# Supplementary material for: Decoding bronze production at Terramara Santa Rosa di Poviglio site (Bronze Age, N Italy): Insights from secondary production waste
Source: Research Square preprint supplement (doi:10.21203/rs.3.rs-6572450/v1), 2025-05-11
Supplement: Supplementary file 1 [file 0ab2b165370eb8c2f3517682.docx]

# Supplementary data

These supplementary materials provide an overview of the raw data collected for each sample, consisting of SEM backscatter images and SEM-EDS measurements. Each table provide the raw analytical data for each sample, with reference to the spectrum and related image.

**­­­**

## **Crucible fragments**

| 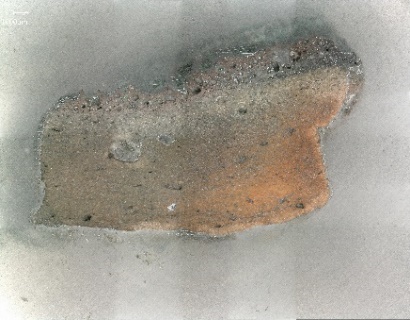 | 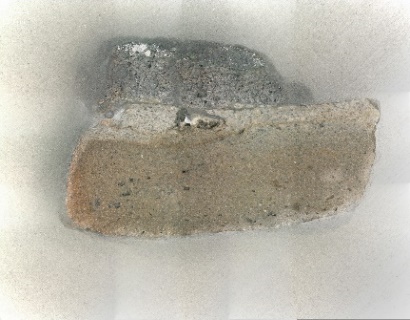 |
| --- | --- |
| a) | b) |
| 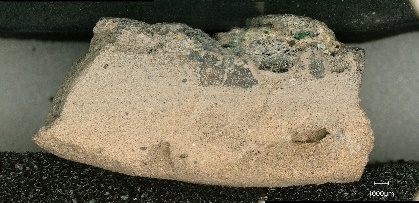 | 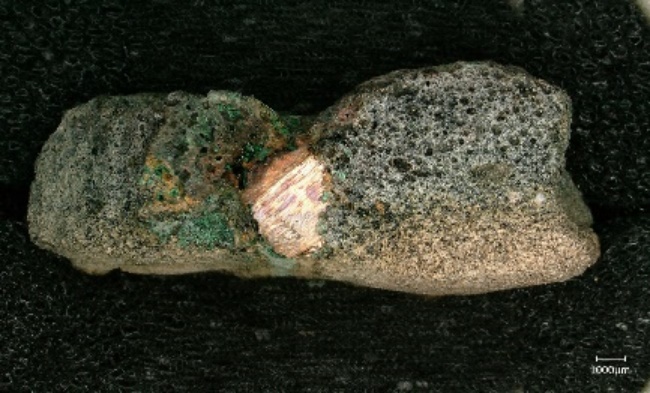 |
| c) | d) |
| 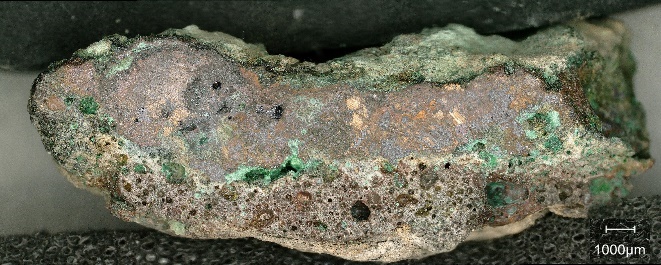 | 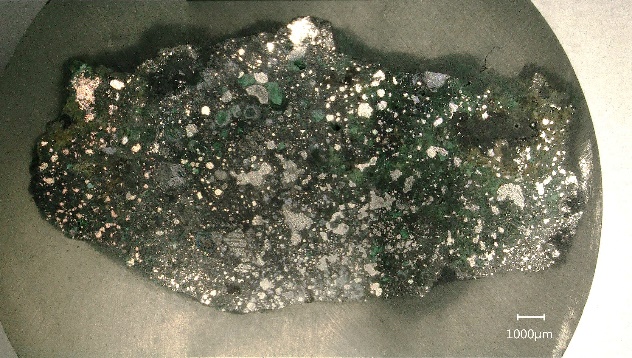 |
| e) | f) |

Fig. 1 Reflected Light images showing the cross-sections of the secondary metallurgical products and by-products investigated: a) TSRP115a; b) TSR115b; c) TSRP91; d) TSRP124; e) TSRP149; f) TSRP91a

#### TSRP91

| Crucible areas | Bloated areas |
| --- | --- |
| 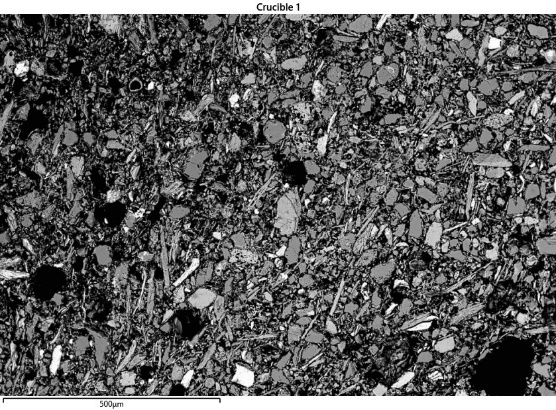 | 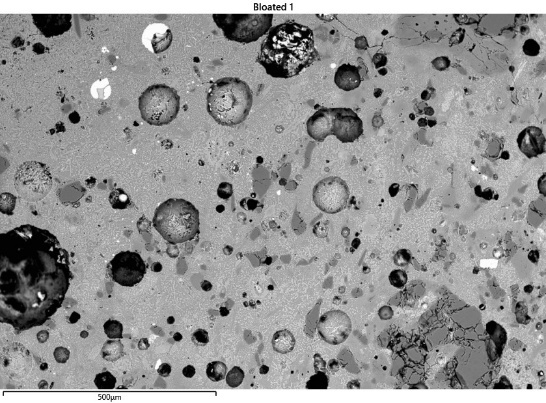 |
| 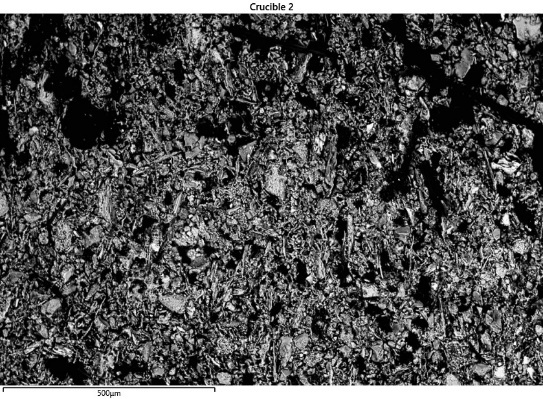 | 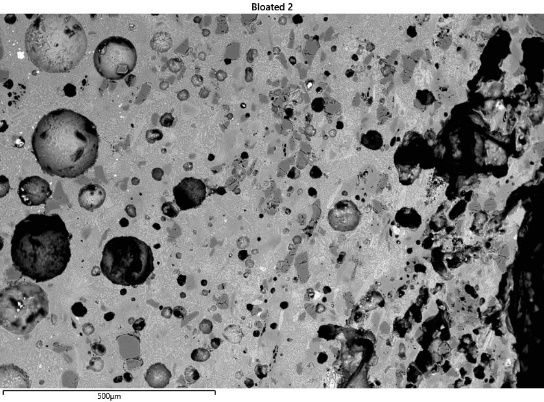 |
| 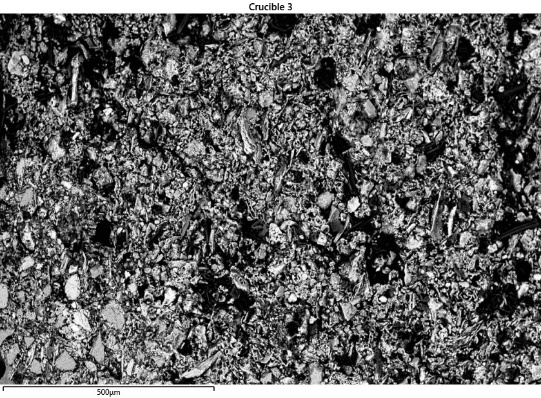 | 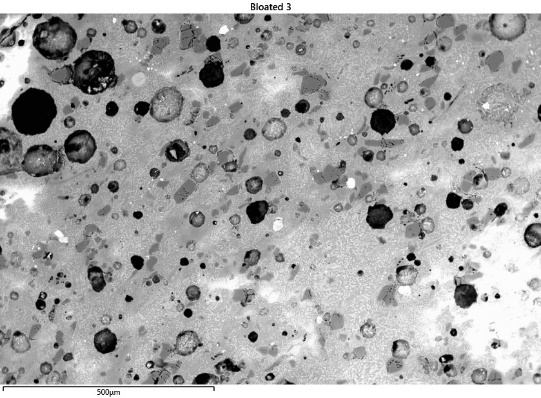 |
| 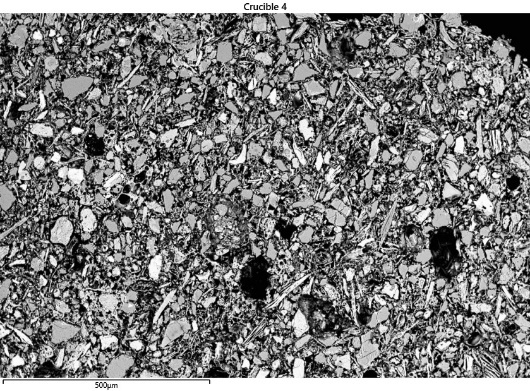 | 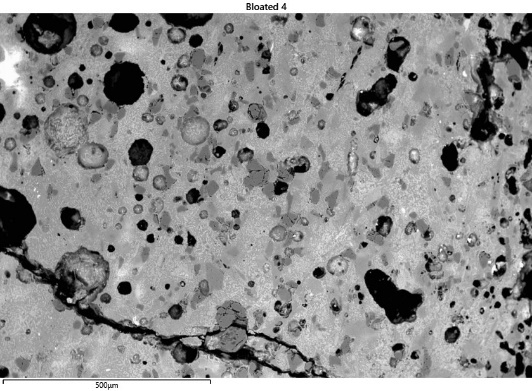 |
| 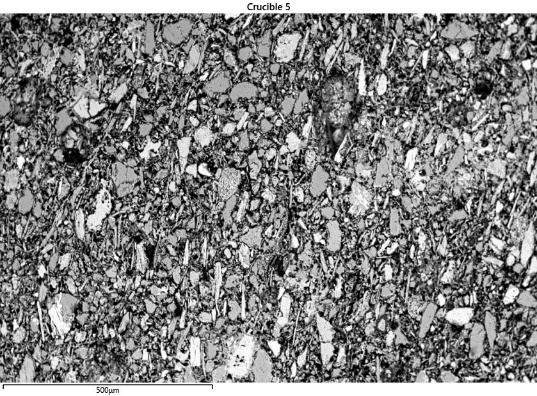 | 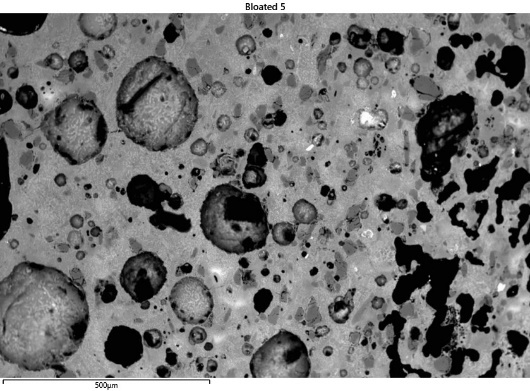 |

Fig. 2 Analysed crucible and bloated areas of sample TSRP91 - area at 100x magnification (c. 1mm2).

Table 2 Analyses carried out on sample TSRP91

| **Description** | **Sp.** | **O** | **Mg** | **Al** | **Si** | **P** | **S** | **Cl** | **K** | **Ca** | **Fe** | **Ni** | **Cu** | **Zn** | **As** | **Ag** | **Sn** | **Sb** | **Pb** |
| --- | --- | --- | --- | --- | --- | --- | --- | --- | --- | --- | --- | --- | --- | --- | --- | --- | --- | --- | --- |
| **Image 1** |  |  |  |  |  |  |  |  |  |  |  |  |  |  |  |  |  |  |  |
| Cu-Sn oxidised | 63 | 27.5 | 0.1 | 0.1 | 3.3 | 0.7 | 0.1 | 0.1 | 0.2 | 1.0 | 0.8 |  | 18.7 | 0.1 | 0.4 |  | 46.0 | 1.0 | 0.1 |
| Cu-Sn oxidised | 64 | 6.4 |  |  | 0.3 |  |  |  | 0.1 |  |  | 0.2 | 59.3 |  | 0.2 |  | 32.2 | 0.9 | 0.2 |
| High-Sn prill | 65 |  |  |  |  |  |  |  |  |  | 0.1 | 0.1 | 55.3 |  | 0.4 |  | 42.2 | 0.9 | 0.9 |
| High-Sn prill | 66 |  |  |  |  |  |  |  |  |  | 0.2 | 0.0 | 48.7 |  | 0.9 |  | 44.9 | 1.2 | 4.1 |
| Sn | 67 |  |  |  |  |  |  |  |  |  | 1.4 | 0.9 | 0.3 |  | 0.1 |  | 94.2 | 3.0 | 0.1 |
| **Image 2** |  |  |  |  |  |  |  |  |  |  |  |  |  |  |  |  |  |  |  |
| High-Sn prill | 68 |  |  |  |  |  |  |  |  |  |  | 0.1 | 54.6 |  | 0.2 |  | 43.5 | 1.3 | 0.4 |
| High-Sn prill | 69 |  |  |  |  |  |  |  |  |  |  | 0.1 | 77.6 |  | 0.2 |  | 21.1 | 0.6 | 0.5 |
| Cu-Sn prill | 70 |  |  |  |  |  |  | 0.2 |  |  | 0.3 |  | 83.5 | 0.3 | 0.3 |  | 14.7 | 0.5 |  |
| High-Sn prill | 71 |  |  |  |  |  |  |  |  |  |  | 0.1 | 71.5 |  | 0.2 |  | 27.2 | 0.8 | 0.1 |
| Cu-Sn prill | 72 |  |  |  | 0.1 |  |  | 0.1 |  | 0.1 | 0.2 | 0.1 | 82.2 |  | 0.2 |  | 16.4 | 0.6 |  |
| High-Sn prill | 73 |  |  |  |  |  |  |  |  |  | 0.2 | 0.1 | 73.2 |  | 0.3 |  | 25.2 | 0.8 | 0.2 |
| **Image 3** |  |  |  |  |  |  |  |  |  |  |  |  |  |  |  |  |  |  |  |
| Cu-Sn prill | 74 | 6.9 |  | 0.1 | 0.4 | 0.2 | 0.1 | 0.1 | 0.1 |  | 0.1 | 0.1 | 54.1 | 0.2 | 0.3 |  | 35.8 | 0.8 | 0.8 |
| Malayaite | 75 | 29.6 | 0.7 | 2.7 | 7.2 |  |  | 0.1 | 0.2 | 17.9 | 8.6 | 0.1 | 0.3 | 0.2 |  |  | 31.3 | 1.3 |  |
| **Image 4** |  |  |  |  |  |  |  |  |  |  |  |  |  |  |  |  |  |  |  |
| High-Sn prill | 76 |  |  |  |  |  |  |  |  |  | 0.3 | 0.2 | 64.2 |  | 0.2 |  | 33.3 | 0.9 | 1.0 |
| Cu-Sn prill | 77 | 10.9 | 0.1 |  | 0.2 | 0.1 | 0.1 | 0.1 | 0.1 | 0.2 | 0.2 | 0.2 | 45.5 | 0.1 | 0.1 |  | 40.4 | 1.4 | 0.6 |
| High-Sn prill | 78 |  |  |  |  |  |  |  |  |  | 0.3 | 0.2 | 69.3 |  | 0.2 |  | 29.1 | 0.9 | 0.2 |
| Malayaite | 79 | 29.2 | 0.6 | 4.2 | 5.4 |  |  | 0.1 | 0.2 | 17.3 | 5.1 |  | 0.3 | 0.3 |  |  | 35.9 | 1.5 |  |
| Malayaite | 80 | 29.1 | 0.6 | 4.4 | 5.8 |  |  | 0.1 | 0.3 | 17.6 | 5.6 | 0.1 | 0.3 | 0.2 |  |  | 34.3 | 1.5 |  |
| **Image 5** |  |  |  |  |  |  |  |  |  |  |  |  |  |  |  |  |  |  |  |
| High-Sn prill | 81 |  |  |  |  |  |  |  |  |  | 0.4 | 0.2 | 72.4 |  | 0.1 |  | 25.6 | 0.5 | 1.0 |
| Cu-Sn prill | 82 |  |  |  |  |  |  | 0.1 | 0.2 |  | 0.3 | 0.3 | 78.8 | 0.3 |  |  | 18.7 | 0.6 | 0.4 |
| Cu-Sn prill | 83 |  |  |  |  |  |  | 0.1 |  |  | 0.4 | 0.1 | 82.1 | 0.1 |  |  | 16.6 | 0.4 | 0.1 |
| High-Sn prill | 84 |  |  |  |  |  |  |  |  |  | 0.3 | 0.2 | 73.5 |  | 0.1 |  | 24.5 | 0.6 | 0.9 |
| Cu-Sn prill | 85 | 7.1 |  |  | 0.3 | 0.2 |  | 0.1 | 0.2 | 0.2 | 0.2 | 0.1 | 55.3 |  | 0.5 |  | 34.6 | 0.8 | 0.7 |
| Cu oxide | 86 | 32.0 |  |  | 0.2 | 0.4 | 0.2 | 0.1 |  | 0.6 | 0.2 |  | 65.8 | 0.1 |  | 0.1 |  | 0.1 | 0.2 |
| **Image 6** |  |  |  |  |  |  |  |  |  |  |  |  |  |  |  |  |  |  |  |
| Cu oxide | 87 | 31.4 | 0.1 | 0.1 | 0.2 |  |  |  |  | 1 | 0.3 |  | 66.4 | 0.1 |  |  |  | 0.1 |  |
| Matrix (area) | 88 | 43.0 | 2.4 | 7.5 | 28.2 | 0.6 |  |  | 5.6 | 8.1 | 3.7 |  | 0.4 |  |  |  | 0.4 |  | 0.1 |
| **Image 7** |  |  |  |  |  |  |  |  |  |  |  |  |  |  |  |  |  |  |  |
| Cu-Sn oxidised | 90 | 16.0 |  |  | 0.4 | 0.2 | 0.1 | 0.1 | 0.2 |  | 0.1 | 0.2 | 11.3 |  | 0.5 |  | 68.6 | 1.4 | 1.0 |
| Cu-Sn oxidised | 91 | 23.9 |  | 0.3 | 1.4 | 0.6 |  |  | 0.3 | 0.5 | 0.4 | 0.1 | 20.2 | 0.1 | 0.3 | 0.2 | 50.4 | 1.0 | 0.3 |
| **Image 8** |  |  |  |  |  |  |  |  |  |  |  |  |  |  |  |  |  |  |  |
| Cu oxide | 163 | 27.5 |  |  | 0.9 | 0.3 | 0.2 | 0.1 |  | 0.9 | 0.3 |  | 69.4 | 0.3 |  |  |  |  |  |
| Cu oxide | 164 | 23.4 |  |  | 1.2 |  |  |  |  | 0.8 | 0.7 |  | 73.6 | 0.1 |  | 0.1 |  |  | 0.4 |
| Cu oxide | 168 | 33.8 |  |  | 0.4 |  | 0.3 | 0.1 |  | 0.2 | 0.7 |  | 64.1 | 0.1 | 0.1 |  |  |  | 0.2 |
| Inclusion | 169 | 43.5 |  | 0.6 | 30.9 | 20.2 |  |  | 0.2 | 1.0 | 1.6 |  |  |  | 0.1 | 0.8 |  | 0.3 | 0.7 |
| Cu oxide | 170 | 31.3 |  |  | 3.1 |  |  |  |  | 0.6 | 0.5 | 0.2 | 63.1 | 0.8 |  |  |  |  | 0.4 |
| **Image 9** |  |  |  |  |  |  |  |  |  |  |  |  |  |  |  |  |  |  |  |
| Cu oxide | 171 | 26.9 |  |  | 0.9 | 0.2 | 0.1 | 0.2 |  | 0.9 | 0.5 |  | 69.9 | 0.2 | 0.1 |  |  | 0.1 | 0.2 |
| Cu oxide | 172 | 13.5 |  |  | 0.6 |  |  | 0.8 |  | 0.2 | 0.9 |  | 83.8 | 0.2 |  |  |  |  |  |
| **Image 10** |  |  |  |  |  |  |  |  |  |  |  |  |  |  |  |  |  |  |  |
| Cu oxide | 179 | 16.7 |  |  | 0.3 | 0.3 | 0.3 | 0.2 |  | 0.6 | 0.9 |  | 80.2 |  |  | 0.4 |  |  | 0.2 |
| Inclusion | 180 | 42.7 |  |  | 31.9 | 22.9 |  |  |  | 0.3 | 0.9 |  |  |  | 0.1 | 0.4 |  | 0.1 | 0.9 |
| **Image 11** |  |  |  |  |  |  |  |  |  |  |  |  |  |  |  |  |  |  |  |
| Cu oxide | 185 | 31.0 | 0.1 |  | 2.4 | 0.3 | 0.1 | 0.2 |  | 0.8 | 0.2 | 0.1 | 64.2 | 0.3 |  |  | 0.1 | 0.1 | 0.1 |
| Cu oxide | 186 | 20 | 0.2 |  | 1.4 | 0.4 | 0.1 | 0.1 |  | 0.9 | 0.3 |  | 76.0 | 0.3 |  |  | 0.1 | 0.1 |  |
| Cu oxide | 188 | 27.0 |  |  | 1.2 |  | 0.1 | 0.1 | 0.1 | 0.3 | 0.3 |  | 70.9 | 0.1 | 0.1 |  |  |  |  |
| Cu oxide | 189 | 24.6 |  |  | 0.3 |  | 0.2 |  |  | 0.8 | 0.6 |  | 73.0 | 0.4 | 0.1 |  |  |  |  |
| Malayaite | 190 | 28.6 |  | 0.2 | 8.0 |  |  | 0.1 | 0.3 | 10.8 | 0.4 |  | 1.0 |  |  |  | 49.7 | 0.8 |  |
| Cu oxide | 191 | 11.4 |  |  | 0.3 |  |  | 0.9 |  |  | 0.4 |  | 86.6 |  |  |  | 0.2 |  |  |
| Cu sulphide | 192 |  |  |  | 0.2 |  | 32.1 |  |  | 0.1 | 0.2 |  | 65.3 |  |  | 1.3 |  |  | 0.8 |

| **Description** | **Sp.** | **O** | **Si** | **P** | **Ca** | **La** | **Ce** | **Pr** | **Nd** | **Sm** | **Gd** | **Os** | **Th** |
| --- | --- | --- | --- | --- | --- | --- | --- | --- | --- | --- | --- | --- | --- |
| **Image 12** |  |  |  |  |  |  |  |  |  |  |  |  |  |
| Inclusion (monazite) | 89 | 25.2 | 0.8 | 13.3 | 1.2 | 11.8 | 24.1 | 2.7 | 8.8 | 1.4 | 1.0 | 0.1 | 9.8 |

| **Description** | **Sp.** | **O** | **Mg** | **Al** | **Si** | **Cl** | **K** | **Ca** | **Ti** | **Cr** | **Fe** | **Cu** | **Sm** | **Eu** |
| --- | --- | --- | --- | --- | --- | --- | --- | --- | --- | --- | --- | --- | --- | --- |
| **Image 13** |  |  |  |  |  |  |  |  |  |  |  |  |  |  |
| Inclusion | 181 | 28.8 | 4.2 | 1.2 | 1.0 | 0.1 | 0.1 | 0.3 | 0.5 | 27.4 | 33.4 | 0.9 | 0.9 | 1.3 |

| 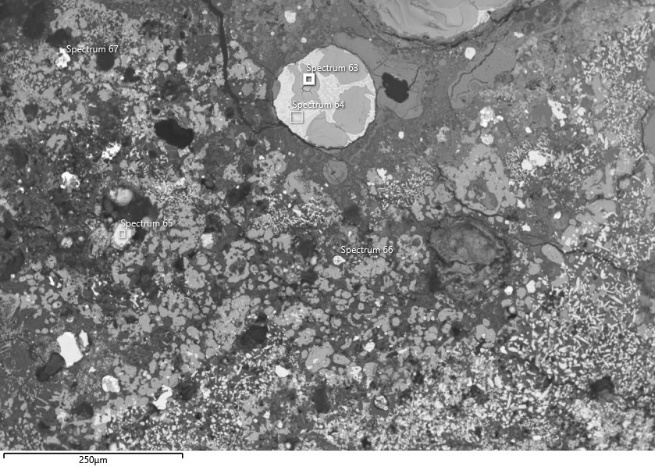 | 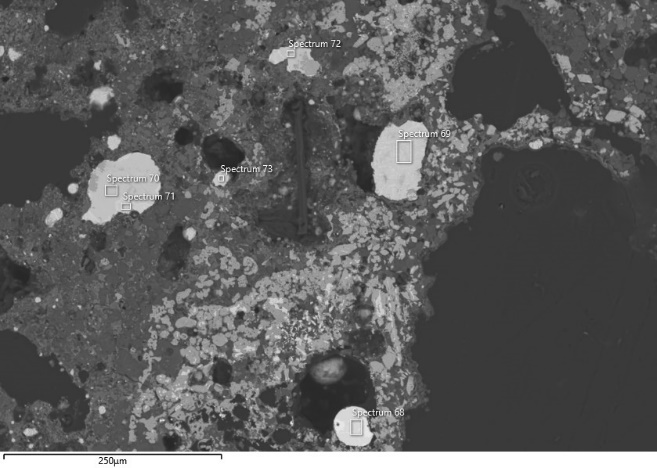 |
| --- | --- |
| Image 1 | Image 2 |
| 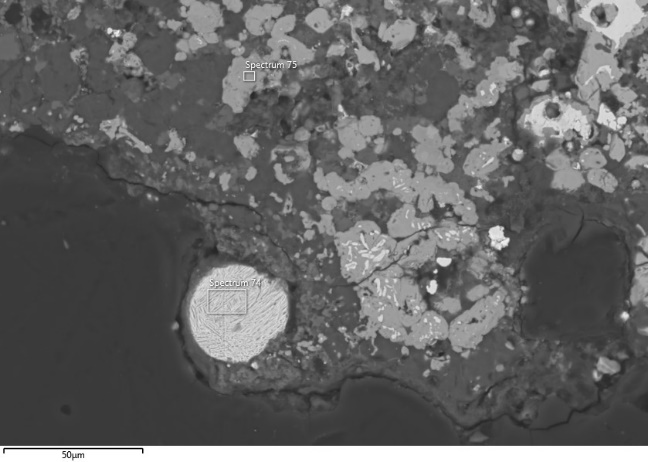 | 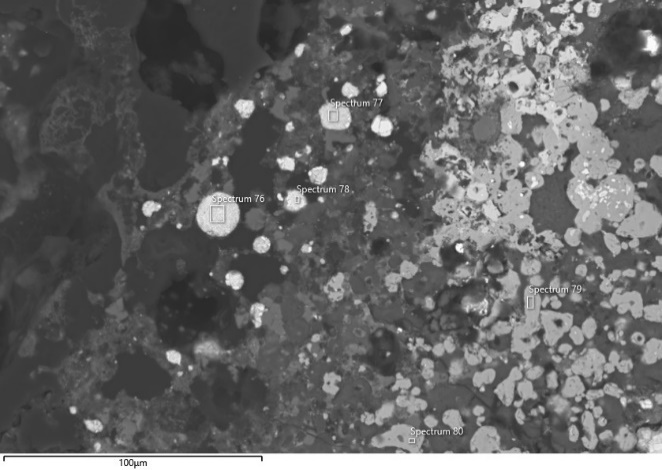 |
| Image 3 | Image 4 |
| 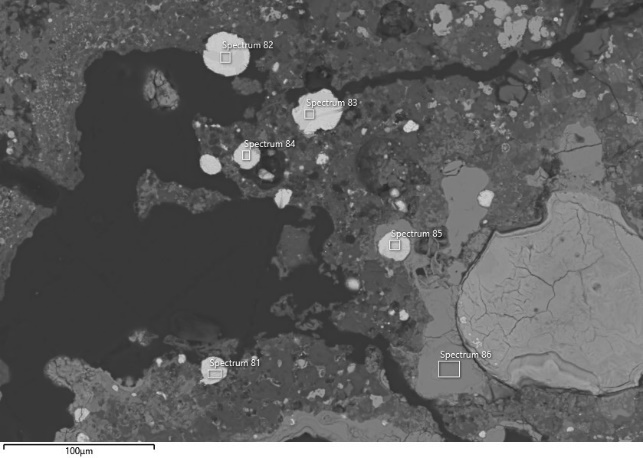 | 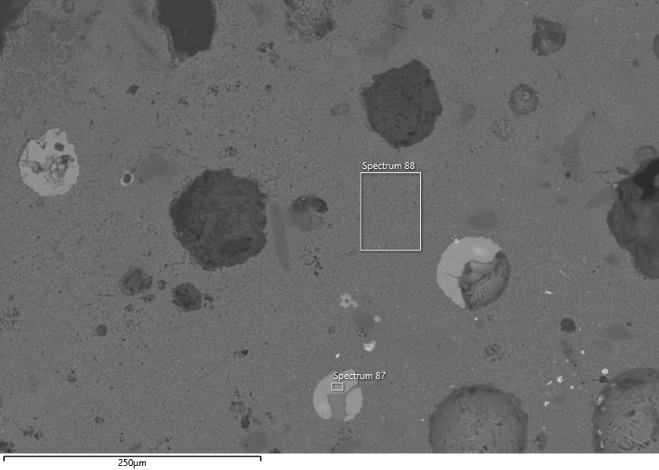 |
| Image 5 | Image 6 |
| 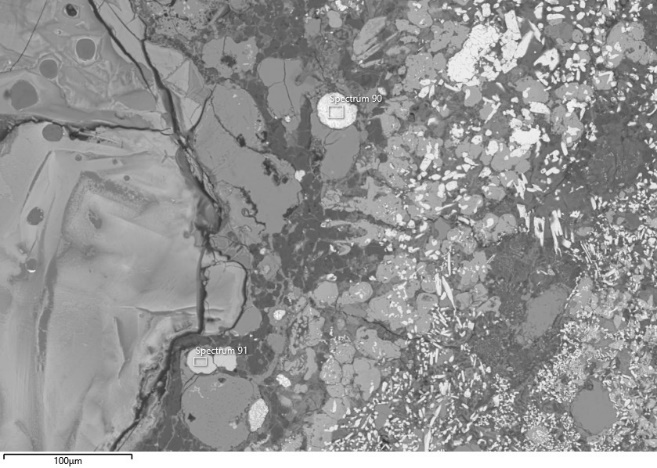 | 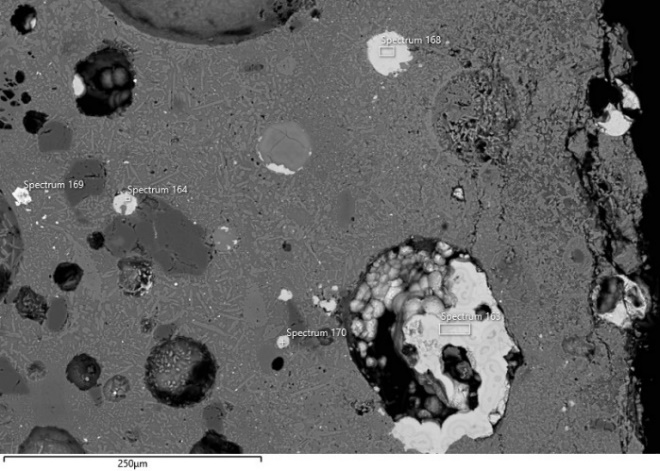 |
| Image 7 | Image 8 |
| 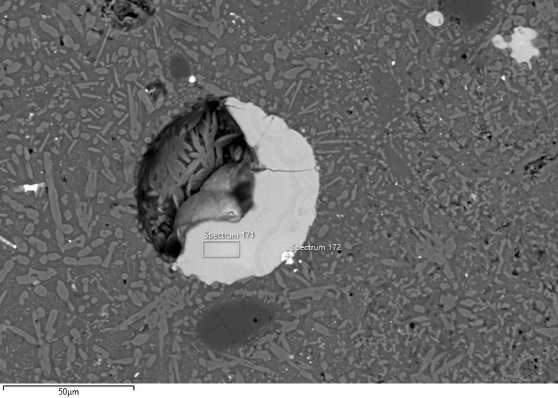 | 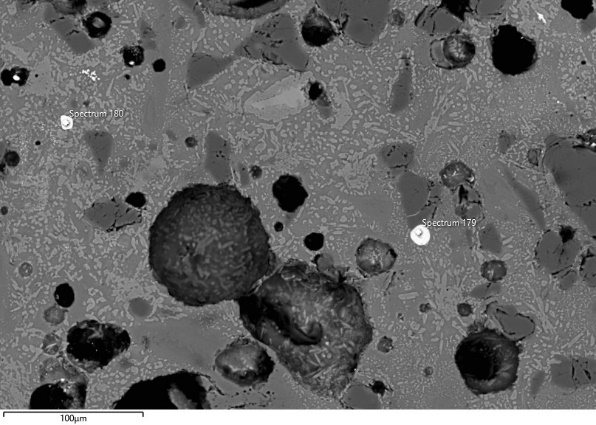 |
| Image 9 | Image 10 |
| 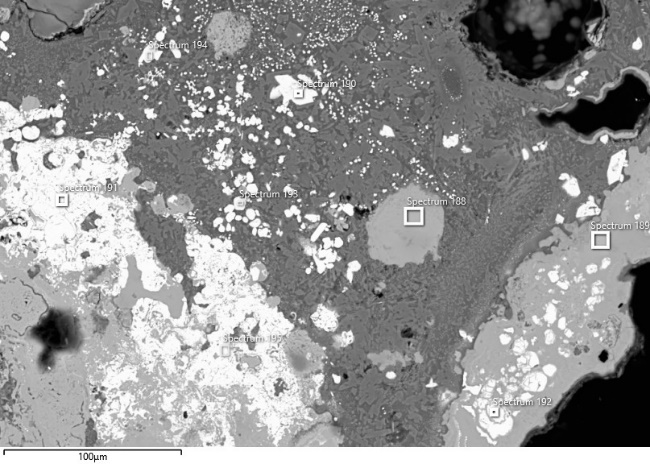 | 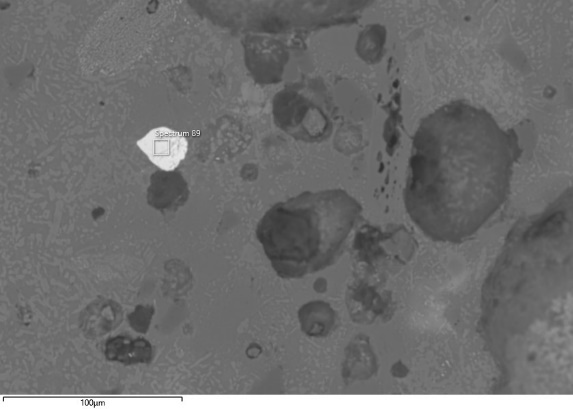 |
| Image 11 | Image 12 |
| 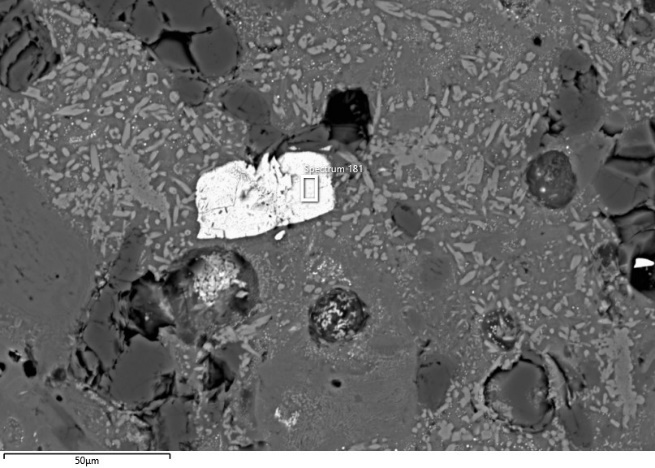 |  |
| Image 13 |

Fig. 3 Locations of the analyses performed on specimen TSRP91. The corresponding analytical results are reported in the table above.

#### TSRP124

| Crucible areas | Bloated areas |
| --- | --- |
| 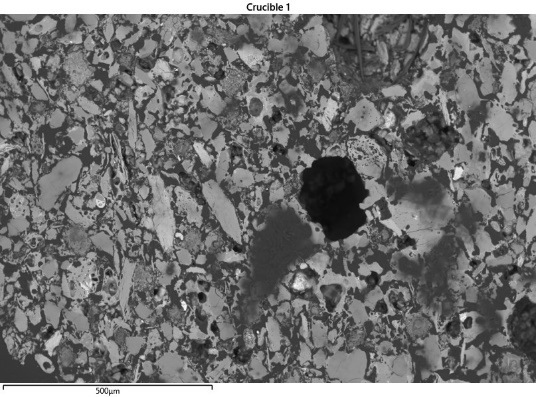 | 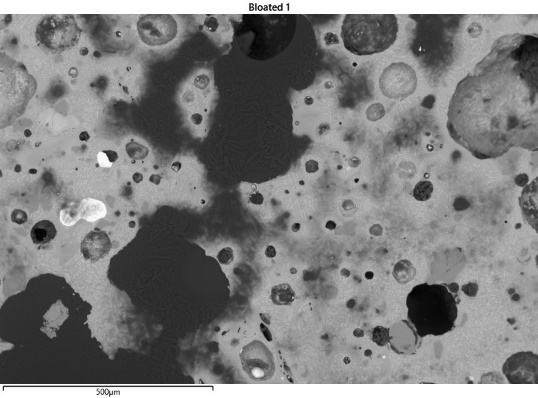 |
|  | 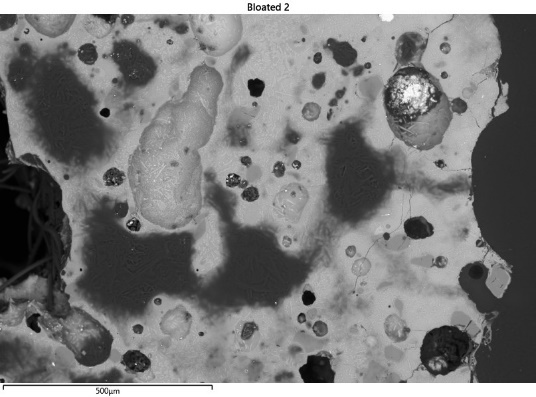 |
|  | 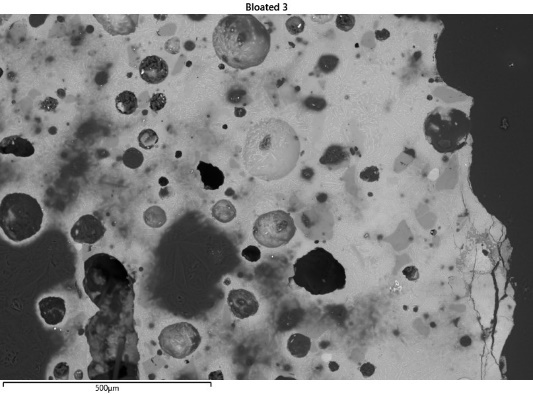 |
|  | 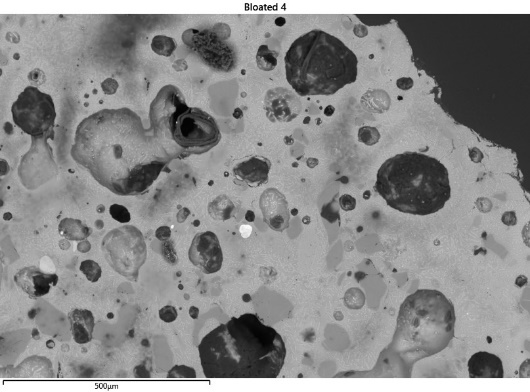 |
|  | 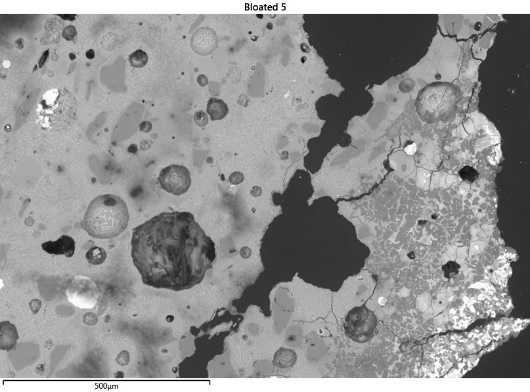 |

Fig. 4 Analysed crucible and bloated areas of sample TSRP124 - area at 100x magnification (c. 1mm2).

Table 3 Analyses carried out on sample TSRP124

| **Description** | **Sp.** | **O** | **Mg** | **Al** | **Si** | **P** | **S** | **Cl** | **K** | **Ca** | **Fe** | **Ni** | **Cu** | **Zn** | **As** | **Ag** | **Sn** | **Sb** | **Pb** |
| --- | --- | --- | --- | --- | --- | --- | --- | --- | --- | --- | --- | --- | --- | --- | --- | --- | --- | --- | --- |
| **Image 1** |  |  |  |  |  |  |  |  |  |  |  |  |  |  |  |  |  |  |  |
| Cu prill | 70 |  |  |  |  |  |  | 0.3 |  |  |  | 0.2 | 98.4 |  | 0.4 | 0.1 |  | 0.6 |  |
| Cu prill oxidised | 71 | 11.8 |  |  |  |  |  | 0.2 |  |  |  |  | 87.6 |  | 0.2 |  |  |  | 0.1 |
| Sn oxide | 72 | 21.6 |  |  |  |  |  | 0.1 | 0.3 |  | 0.3 |  | 2.9 |  |  |  | 73.6 | 1.1 |  |
| **Image 2** |  |  |  |  |  |  |  |  |  |  |  |  |  |  |  |  |  |  |  |
| Cu prill | 74 |  |  |  |  |  |  | 0.2 |  |  | 0.1 |  | 98.4 |  | 0.3 | 0.3 | 0.7 |  |  |
| Sn oxide | 75 | 21.9 |  |  |  |  |  | 0.1 | 0.3 |  | 0.3 |  | 0.8 | 0.1 |  |  | 75.4 | 1.0 |  |
| **Image 3** |  |  |  |  |  |  |  |  |  |  |  |  |  |  |  |  |  |  |  |
| Cu prill phase | 77 |  |  |  |  |  |  | 0.2 |  |  | 0.3 |  | 98.8 |  | 0.4 | 0.1 |  |  | 0.1 |
| Cu prill phase | 78 | 9.2 |  |  |  |  |  | 0.4 |  |  | 0.2 |  | 89.8 | 0.1 |  |  |  |  |  |
| **Image 4** |  |  |  |  |  |  |  |  |  |  |  |  |  |  |  |  |  |  |  |
| Cu prill phase | 80 |  |  |  |  |  |  | 0.1 |  |  | 0.1 |  | 98.7 | 0.2 | 0.3 | 0.1 |  | 0.3 | 0.1 |
| Cu prill oxidised phase | 81 | 9.1 |  | 0.2 |  |  |  | 0.1 |  |  | 0.1 |  | 90.1 | 0.1 | 0.1 |  |  |  | 0.1 |
| Cu oxide | 82 | 31.0 |  | 0.3 |  | 0.1 | 0.1 | 0.1 |  | 0.1 | 0.4 |  | 67.7 |  |  |  |  |  | 0.1 |
| **Image 5** |  |  |  |  |  |  |  |  |  |  |  |  |  |  |  |  |  |  |  |
| Cu prill | 83 |  |  |  |  |  |  | 0.2 |  |  | 0.2 |  | 98.5 | 0.1 | 0.3 | 0.1 | 0.1 | 0.3 |  |
| Cu prill | 84 |  |  |  |  |  | 0.1 | 0.1 |  |  | 0.3 | 0.1 | 98.5 | 0.1 | 0.3 | 0.1 |  | 0.2 |  |
| Cu prill phase | 85 |  |  |  |  |  |  | 0.2 |  |  | 0.5 |  | 98.1 | 0.1 | 0.5 |  | 0.2 | 0.2 | 0.1 |
| Cu prill | 86 |  |  |  |  |  |  | 0.2 |  | 0.1 | 0.4 |  | 98.4 | 0.1 | 0.2 | 0.1 |  | 0.2 |  |
| **Image 6** |  |  |  |  |  |  |  |  |  |  |  |  |  |  |  |  |  |  |  |
| Cu prill phase | 87 | 1.6 |  |  |  |  | 0.1 | 0.1 |  |  |  |  | 95.3 |  | 0.2 |  | 2.3 | 0.1 | 0.2 |
| Cu prill oxidised phase | 88 | 9.5 |  |  |  |  |  | 0.1 |  |  | 0.1 |  | 89.9 |  |  | 0.3 |  | 0.1 |  |
| Cu oxide | 89 | 28.5 |  | 0.4 | 0.3 | 0.4 | 0.2 | 0.1 |  | 0.3 | 0.3 |  | 68.9 | 0.1 | 0.1 |  |  |  | 0.5 |
| **Image 7** |  |  |  |  |  |  |  |  |  |  |  |  |  |  |  |  |  |  |  |
| Cu prill | 90 |  |  |  |  |  |  | 0.1 |  | 0.1 | 0.6 |  | 98.6 | 0.1 |  | 0.4 |  |  |  |
| Cu prill | 91 |  |  |  |  |  |  | 0.3 |  |  | 0.7 |  | 98.9 | 0.1 |  |  |  |  |  |
| **Image 8** |  |  |  |  |  |  |  |  |  |  |  |  |  |  |  |  |  |  |  |
| Cu prill | 93 |  |  |  |  |  |  | 0.1 | 0.1 |  | 0.3 |  | 94.9 | 0.2 | 0.4 |  | 2.3 | 1.7 |  |

| Description | Sp. | O | Al | Si | P | Ca | La | Ce | Pr | Nd | Sm | Th |
| --- | --- | --- | --- | --- | --- | --- | --- | --- | --- | --- | --- | --- |
| **Image 9** |  |  |  |  |  |  |  |  |  |  |  |  |
| Inclusion (monazite) | 92 | 25.23 | 0.12 | 0.18 | 13.41 | 0.34 | 17.51 | 29.42 | 2.75 | 9 | 0.99 | 1.03 |

| 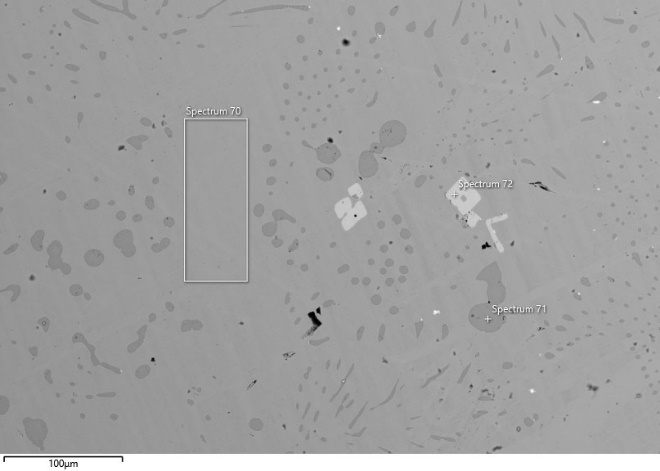 | 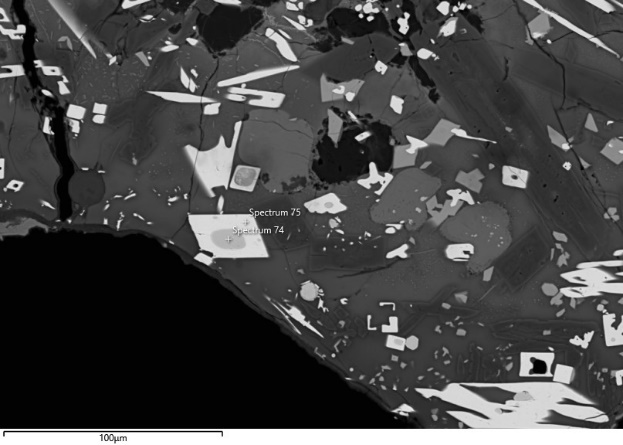 |
| --- | --- |
| Image 1 | Image 2 |
| 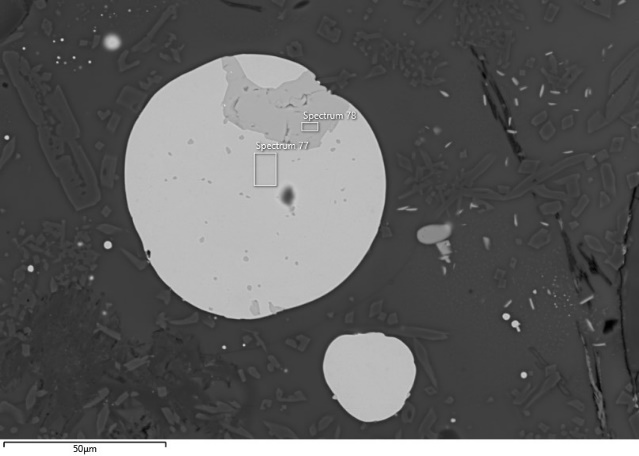 | 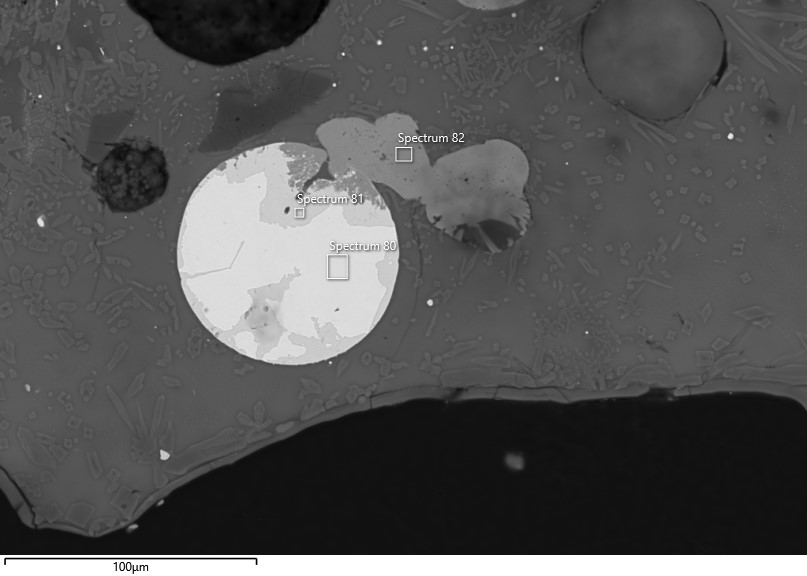 |
| Image 3 | Image 4 |
| 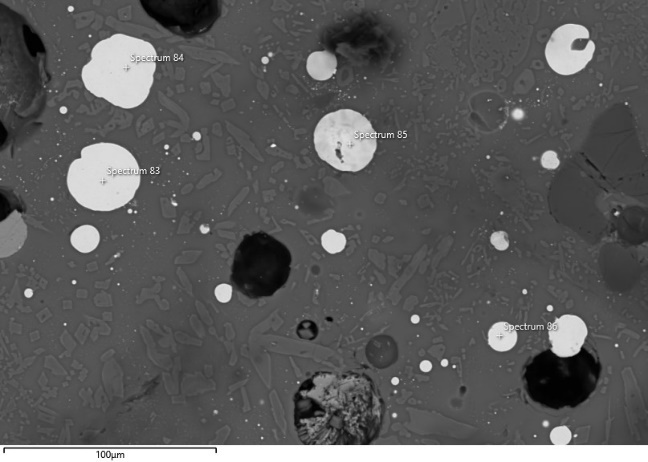 | 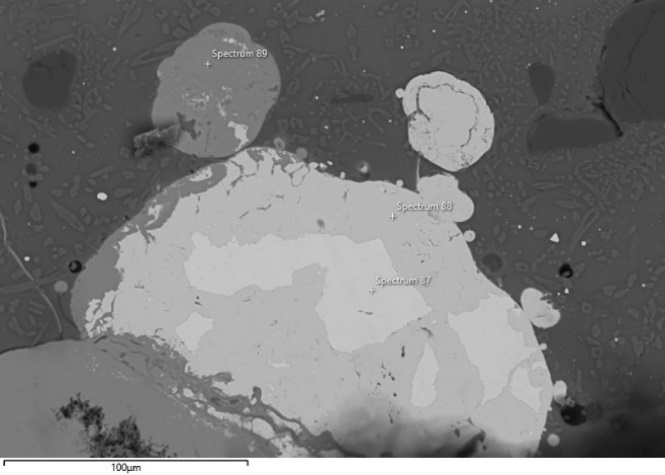 |
| Image 5 | Image 6 |
| 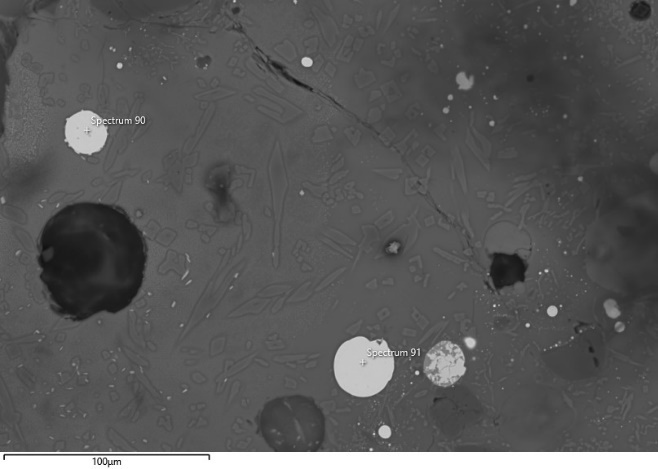 | 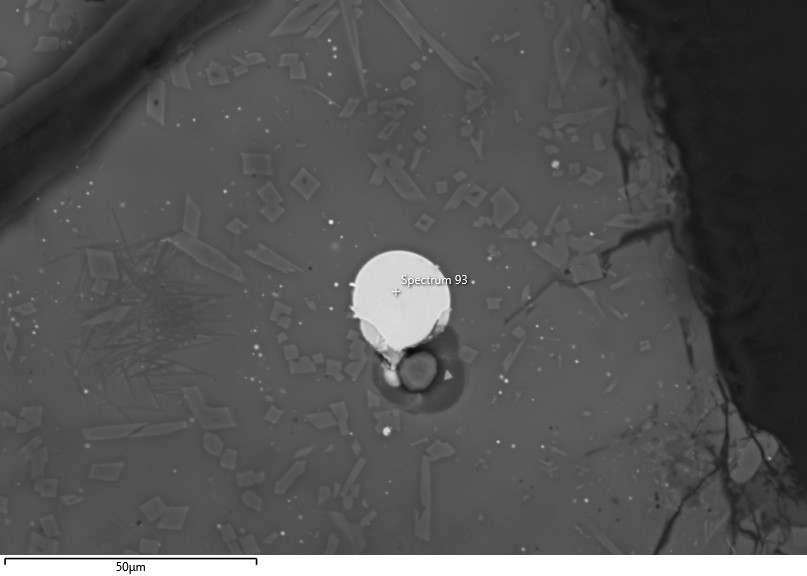 |
| Image 7 | Image 8 |
| 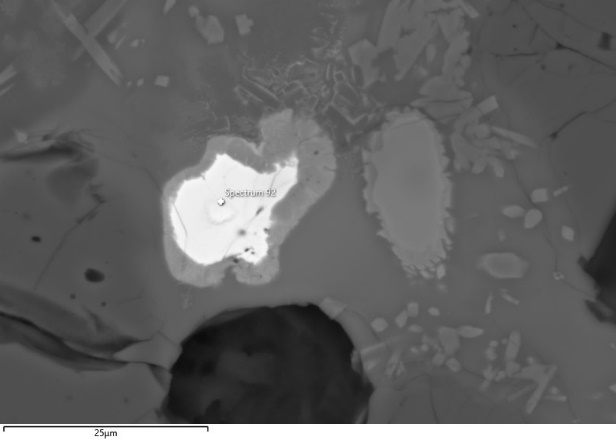 |  |
| Image 9 |

Fig. 5 Locations of the analyses performed on specimen TSRP124. The corresponding analytical results are reported in the table above.

#### TSRP115a

| Crucible areas | Bloated areas |
| --- | --- |
| 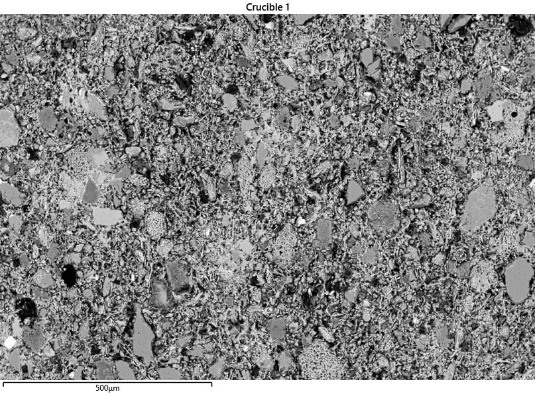 | 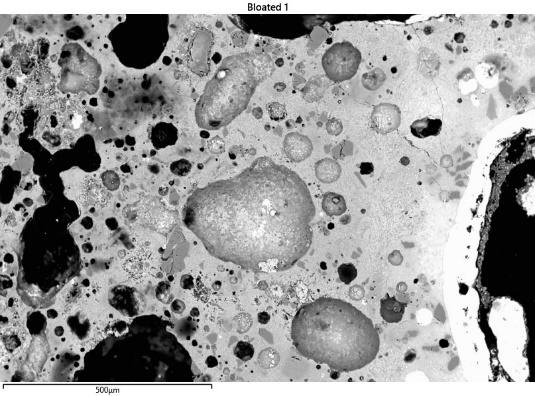 |
| 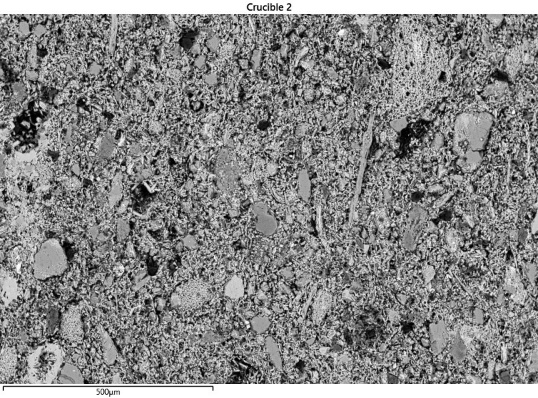 | 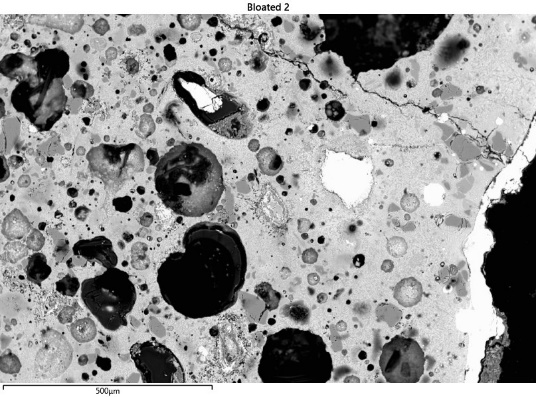 |
| 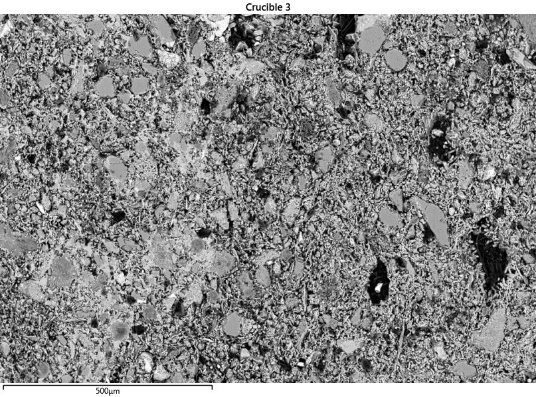 | 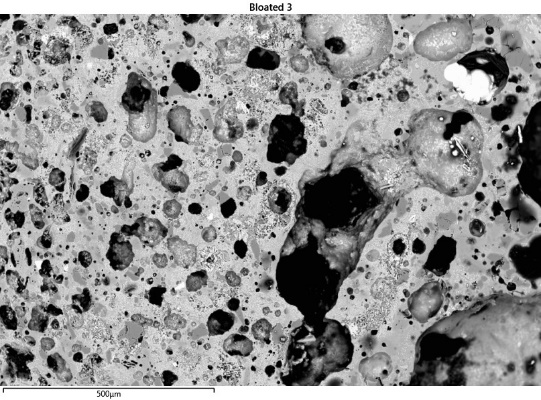 |
| 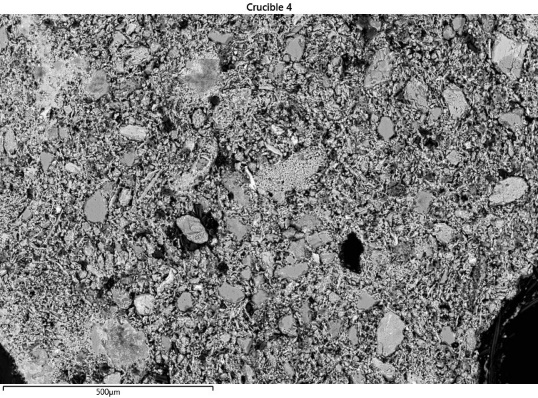 | 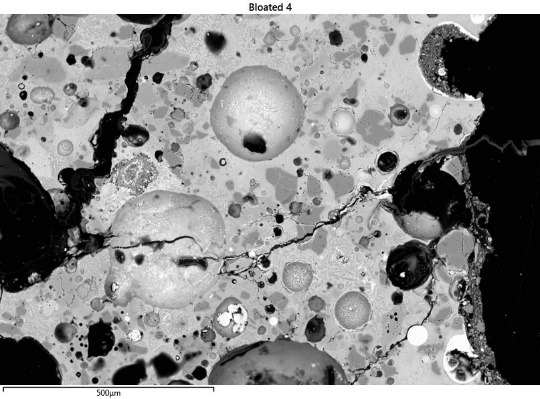 |
| 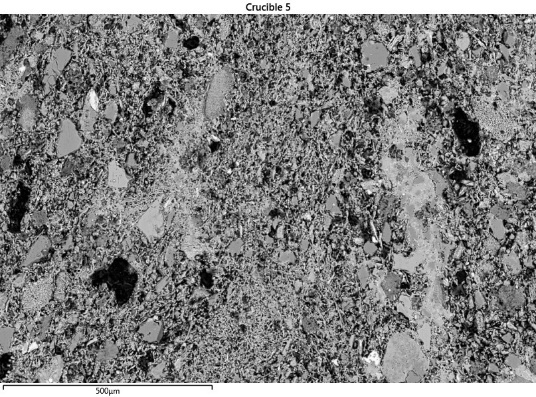 | 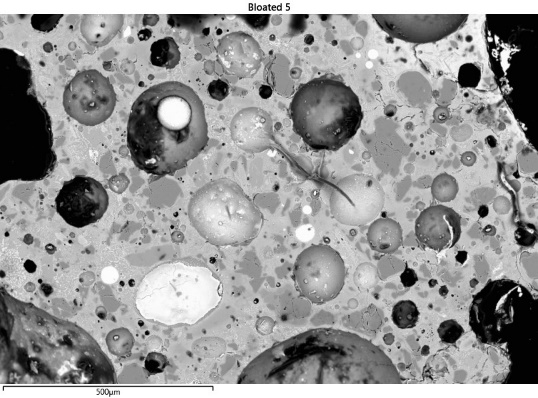 |

Fig. 6 Analysed crucible and bloated areas of sample TSRP115a - area at 100x magnification (c. 1mm2).

Table 4 Analyses carried out on sample TSRP115a

| **Description** | **Sp.** | **O** | **Mg** | **Al** | **Si** | **P** | **S** | **Cl** | **K** | **Ca** | **Fe** | **Ni** | **Cu** | **Zn** | **As** | **Ag** | **Sn** | **Sb** | **Pb** |
| --- | --- | --- | --- | --- | --- | --- | --- | --- | --- | --- | --- | --- | --- | --- | --- | --- | --- | --- | --- |
| **Image 1** |  |  |  |  |  |  |  |  |  |  |  |  |  |  |  |  |  |  |  |
| Cu prill | 136 | 2.0 |  | 0.2 | 0.4 |  | 0.3 |  | 0.3 | 0.4 | 1.2 |  | 94.8 | 0.1 | 0.2 | 0.1 | 0.1 | 0.1 |  |
| Cu prill | 137 | 3.2 |  | 0.5 | 1.7 |  | 0.1 | 0.2 | 0.6 | 0.9 | 1.4 | 0.1 | 90.8 | 0.1 | 0.1 | 0.1 | 0.1 | 0.1 | 0.1 |
| Cu oxide | 138 | 17.6 | 0.2 | 4.2 | 13.1 | 0.3 |  | 0.1 | 2.2 | 5.1 | 2.9 |  | 53.1 | 0.2 |  | 0.1 | 0.3 | 0.1 | 0.5 |
| **Image 2** |  |  |  |  |  |  |  |  |  |  |  |  |  |  |  |  |  |  |  |
| Cu oxide | 139 | 34.1 |  | 0.1 | 0.2 | 0.1 | 0.2 | 0.1 |  | 0.3 | 1.3 | 0.3 | 61.3 | 1.5 | 0.1 |  |  |  | 0.4 |
| **Image 3** |  |  |  |  |  |  |  |  |  |  |  |  |  |  |  |  |  |  |  |
| Cu prill | 140 |  |  |  |  |  |  | 0.1 |  |  | 0.5 |  | 98.1 | 0.3 |  | 0.2 | 0.4 | 0.3 |  |
| Sn oxide | 141 | 21.3 |  |  |  |  |  |  | 0.4 |  | 0.2 |  | 0.9 | 0.2 | 0.1 |  | 76.2 | 0.9 |  |
| Image 4 |  |  |  |  |  |  |  |  |  |  |  |  |  |  |  |  |  |  |  |
| Cu oxide phase | 142 | 34.1 |  |  |  |  |  | 0.1 |  | 0.2 | 0.5 | 0.1 | 63.9 | 0.7 |  | 0.1 |  |  | 0.3 |
| Cu oxide phase | 143 | 11.1 |  |  | 0.1 |  |  | 0.2 |  | 0.1 | 0.5 |  | 87.8 | 0.1 |  |  |  |  |  |
| **Image 5** |  |  |  |  |  |  |  |  |  |  |  |  |  |  |  |  |  |  |  |
| Cu prill | 144 |  |  |  |  |  |  |  |  |  | 0.2 |  | 98.1 | 0.1 | 0.2 | 0.4 | 0.2 | 0.3 | 0.6 |
| Cu prill | 145 |  |  |  |  |  |  | 0.1 |  |  | 0.3 |  | 98.9 | 0.3 | 0.2 | 0.2 |  | 0.1 |  |
| Cu prill | 146 |  |  |  |  |  | 0.1 | 0.2 |  |  | 0.7 |  | 98.6 | 0.1 | 0.1 | 0.1 | 0.1 | 0.3 |  |
| **Image 6** |  |  |  |  |  |  |  |  |  |  |  |  |  |  |  |  |  |  |  |
| Cu prill | 147 |  |  |  |  |  |  |  |  |  | 0.2 | 0.1 | 98.2 | 0.1 | 0.5 | 0.2 | 0.1 | 0.3 | 0.3 |
| Cu prill | 148 | 1.7 |  |  |  |  |  |  |  |  | 0.5 |  | 97.4 | 0.2 | 0.1 | 0.1 | 0.1 | 0.1 |  |
| Cu prill | 149 |  |  |  |  |  |  |  |  | 0.1 | 0.7 |  | 98.2 | 0.2 |  |  | 0.3 | 0.5 |  |
| **Image 7** |  |  |  |  |  |  |  |  |  |  |  |  |  |  |  |  |  |  |  |
| Cu oxide | 150 | 30.6 |  |  |  |  |  |  |  | 0.2 | 0.9 |  | 66.5 | 0.3 | 0.1 |  |  |  | 1.5 |
| Cu oxide phase | 151 | 32.7 |  |  |  |  |  |  |  | 0.1 | 0.6 |  | 65.7 | 0.3 |  |  |  |  | 0.6 |
| Cu prill | 152 |  |  |  |  |  | 0.1 | 0.1 |  | 0.1 | 0.8 |  | 98.2 | 0.1 |  | 0.1 | 0.1 | 0.3 |  |
| **Image 8** |  |  |  |  |  |  |  |  |  |  |  |  |  |  |  |  |  |  |  |
| Cu prill | 153 |  |  |  |  |  |  |  |  | 0.1 | 0.9 |  | 97.9 | 0.1 | 0.7 | 0.2 |  |  | 0.1 |
| Cu prill | 154 | 1.7 |  | 0.1 | 0.2 |  |  | 0.1 |  | 0.1 | 0.9 |  | 96.1 | 0.1 | 0.4 | 0.1 | 0.1 |  | 0.1 |
| Cu prill | 155 |  |  |  |  |  | 0.1 | 0.1 | 0.1 | 0.1 | 1.0 |  | 97.0 |  | 0.7 |  | 0.2 |  | 0.6 |
| **Image 9** |  |  |  |  |  |  |  |  |  |  |  |  |  |  |  |  |  |  |  |
| Cu prill | 156 | 1.8 |  |  |  |  |  | 0.1 |  |  | 0.9 |  | 97.1 | 0.1 |  | 0.1 |  |  |  |
| Cu prill | 157 |  |  |  |  |  |  | 0.1 | 0.1 |  | 0.7 |  | 98.6 | 0.2 |  |  | 0.2 |  | 0.1 |
| **Image 10** |  |  |  |  |  |  |  |  |  |  |  |  |  |  |  |  |  |  |  |
| Cu sulphide | 158 | 7.0 |  | 0.1 | 0.1 | 0.1 | 28.1 |  | 0.1 | 0.1 | 22.8 |  | 40.2 |  | 0.2 | 0.6 |  | 0.1 | 0.7 |
| **Image 11** |  |  |  |  |  |  |  |  |  |  |  |  |  |  |  |  |  |  |  |
| Cu prill | 159 |  |  |  | 0.2 |  |  |  |  | 0.1 | 0.8 |  | 98.3 | 0.2 |  | 0.2 |  |  | 0.1 |
| Cu prill | 160 |  |  |  |  |  |  |  |  | 0.1 | 1.0 |  | 98.7 |  | 0.1 |  |  |  | 0.1 |
| Cu prill | 161 | 4.4 |  | 0.1 | 0.2 | 0.1 |  | 0.1 | 0.1 | 0.1 | 0.8 |  | 93.8 | 0.1 | 0.1 |  |  |  | 0.1 |
| **Image 12** |  |  |  |  |  |  |  |  |  |  |  |  |  |  |  |  |  |  |  |
| Cu-Sn oxide | 162 | 27.3 | 2.2 | 1.1 | 0.5 | 0.1 |  | 0.1 | 0.3 | 0.1 | 55.8 | 1.6 | 1.1 | 0.7 |  |  | 9.2 |  |  |
| Sn oxide | 163 | 21.2 |  |  | 0.1 |  |  | 0.1 | 0.4 |  | 0.6 |  | 0.8 |  |  |  | 75.9 | 0.9 | 0.1 |
| Cu prill | 164 |  |  |  |  |  |  | 0.2 |  |  | 0.5 |  | 97.9 |  |  | 0.4 | 0.6 | 0.5 |  |

| 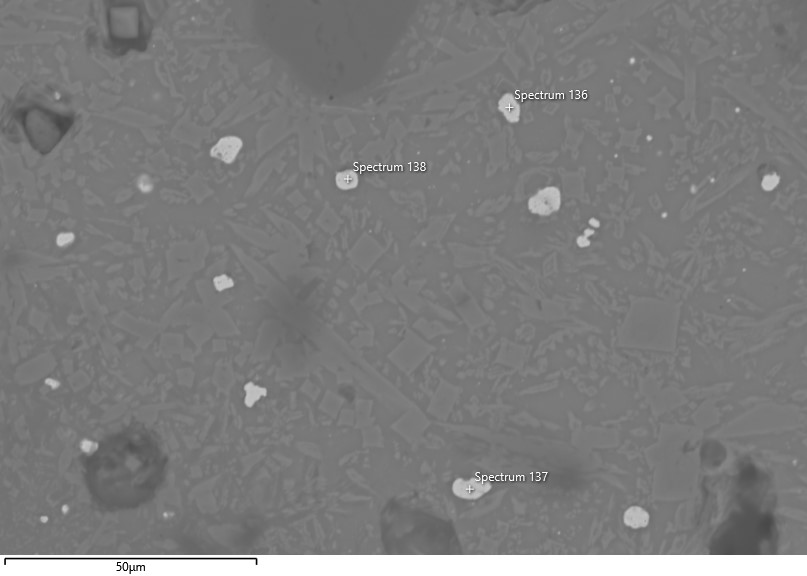 | 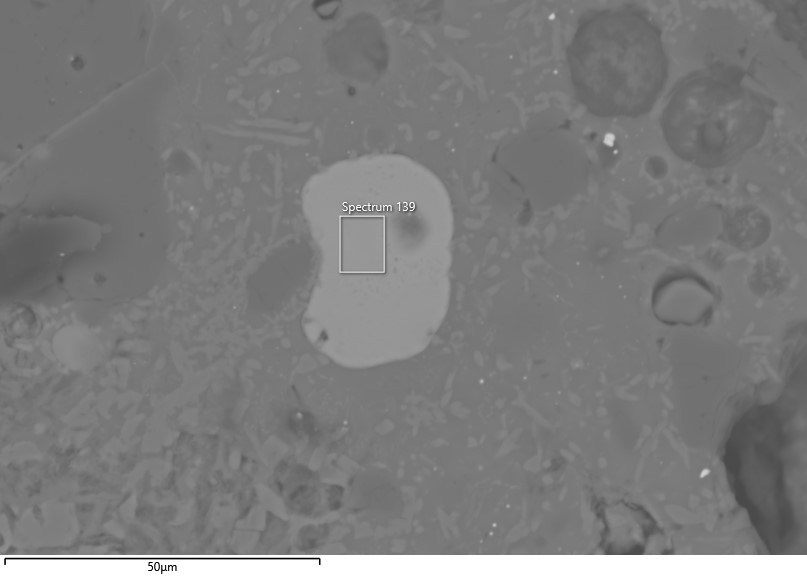 |
| --- | --- |
| Image 1 | Image 2 |
| 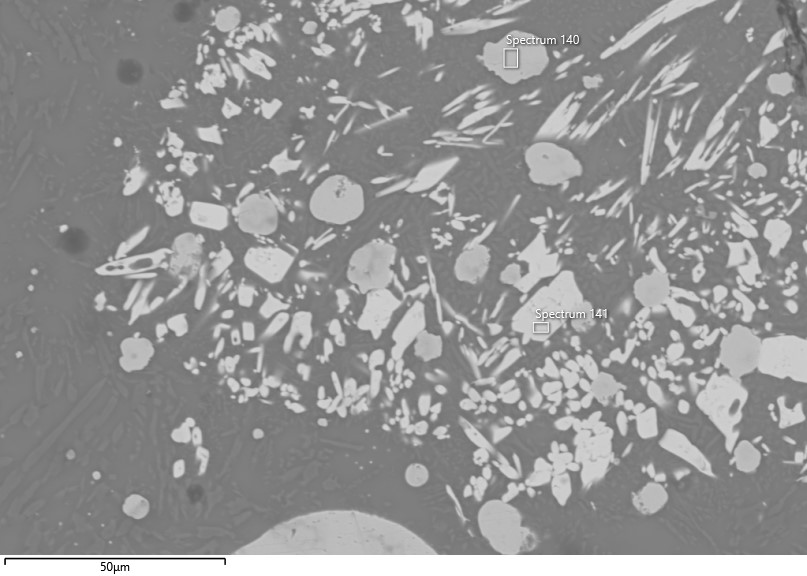 | 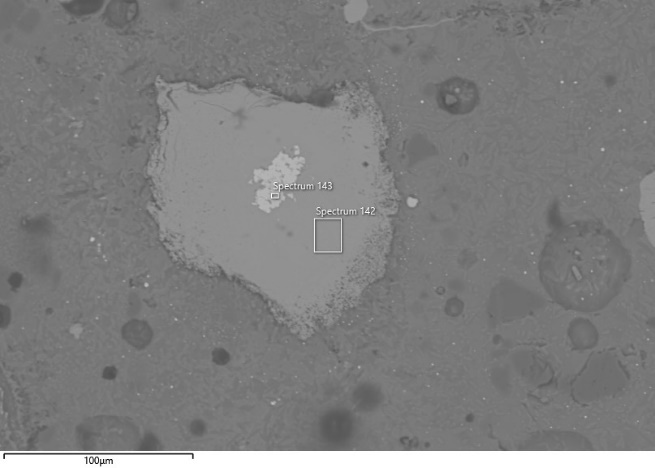 |
| Image 3 | Image 4 |
| 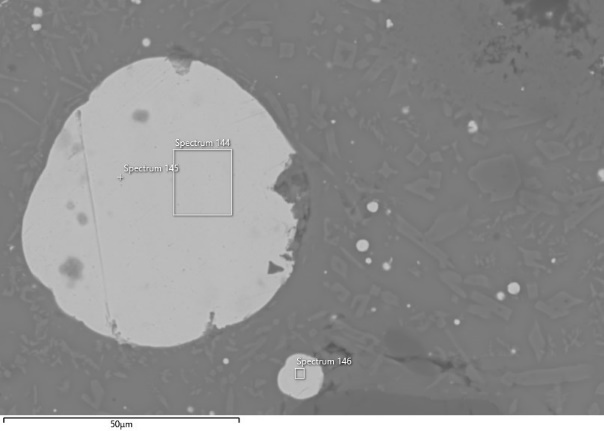 | 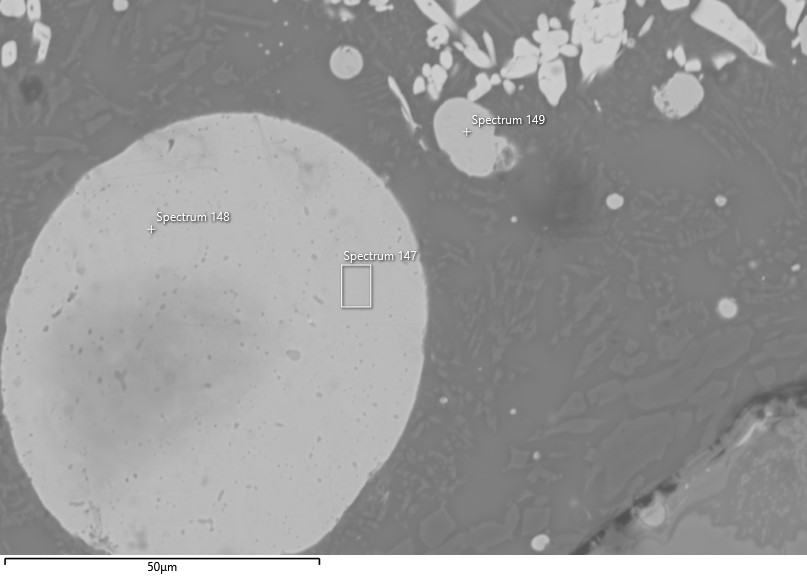 |
| Image 5 | Image 6 |
| 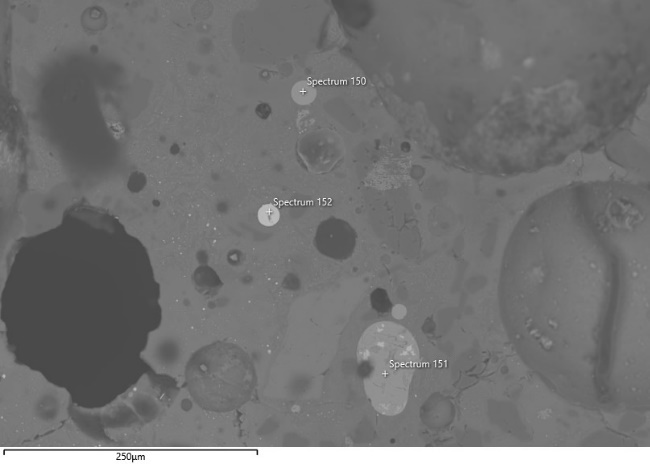 | 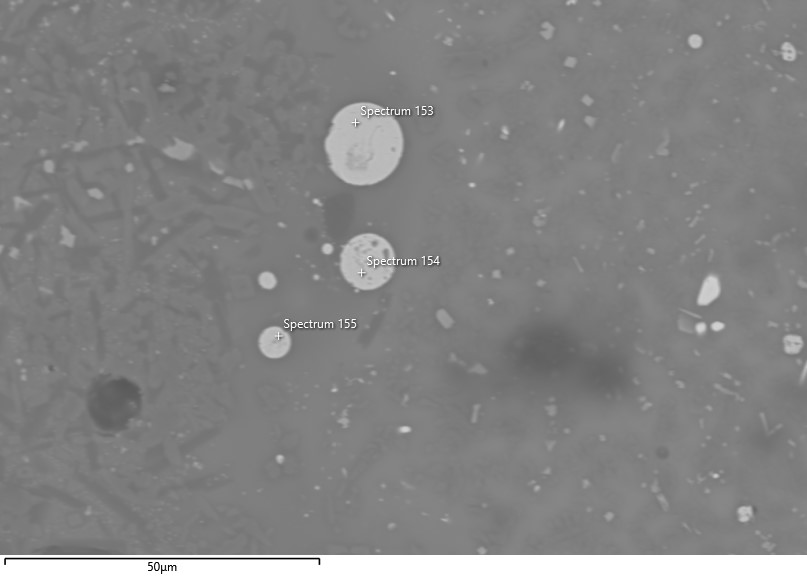 |
| Image 7 | Image 8 |
| 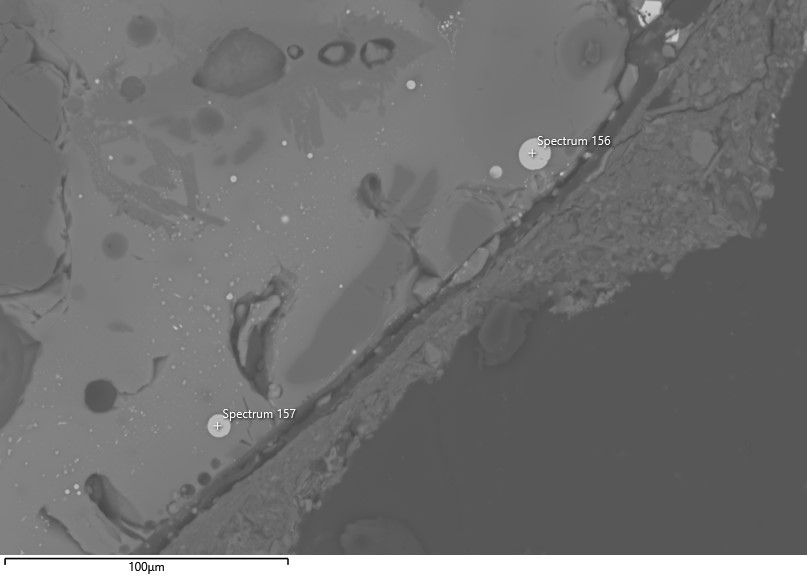 | 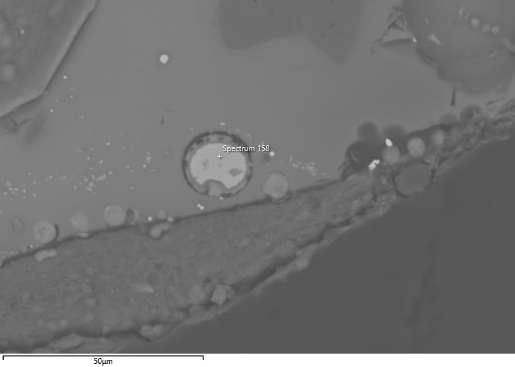 |
| Image 9 | Image 10 |
| 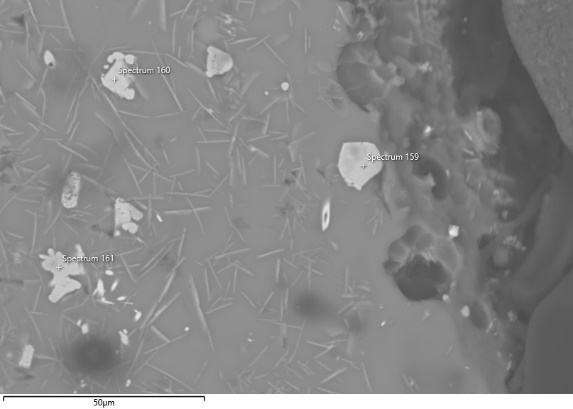 | 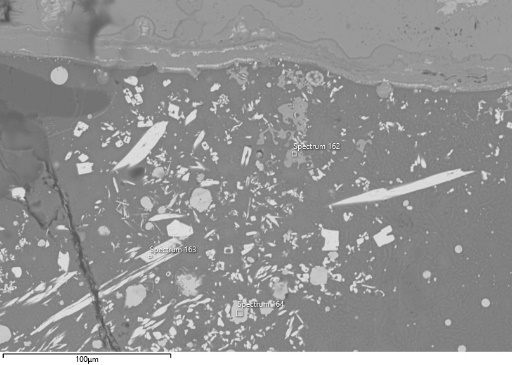 |
| Image 11 | Image 12 |

Fig. 7 Locations of the analyses performed on specimen TSRP115a. The corresponding analytical results are reported in the table above.

#### TSRP115b

| Crucible areas | Bloated areas |
| --- | --- |
| 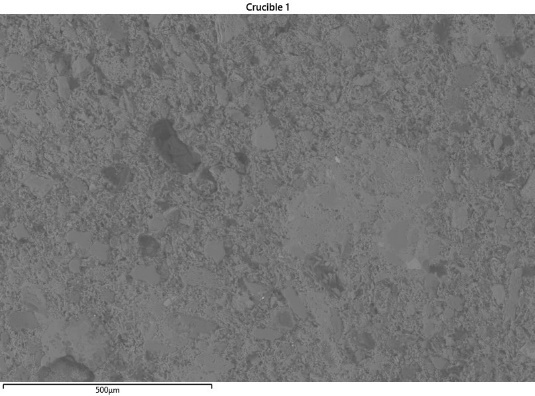 | 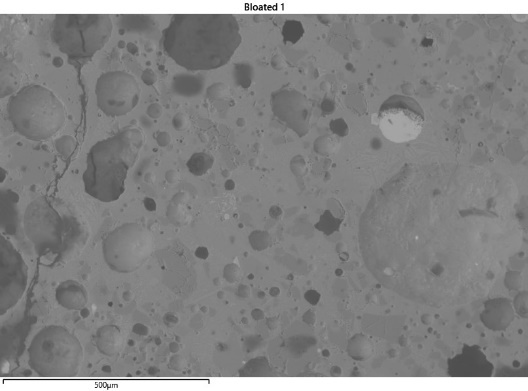 |
| 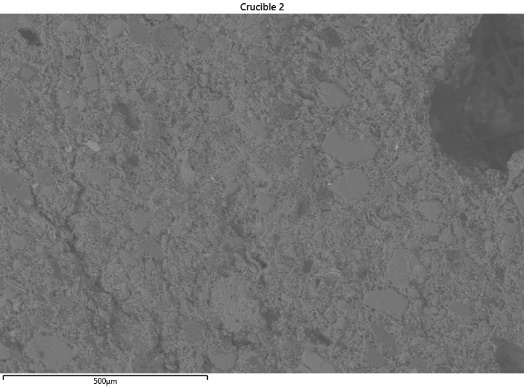 | 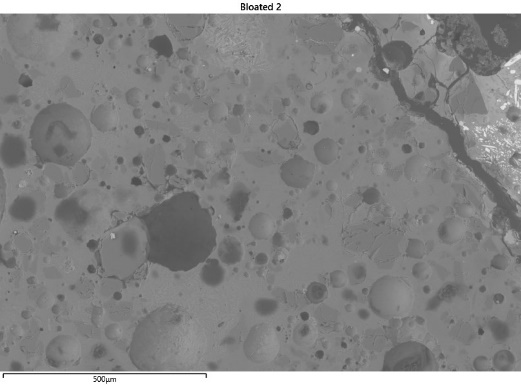 |
| 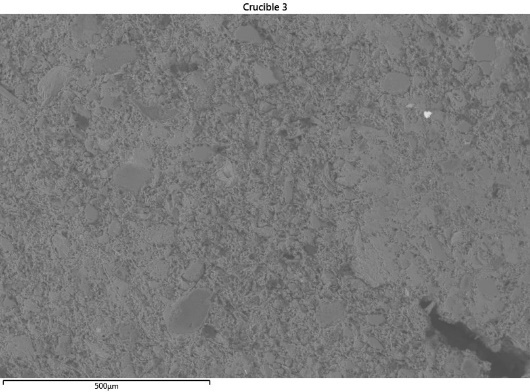 | 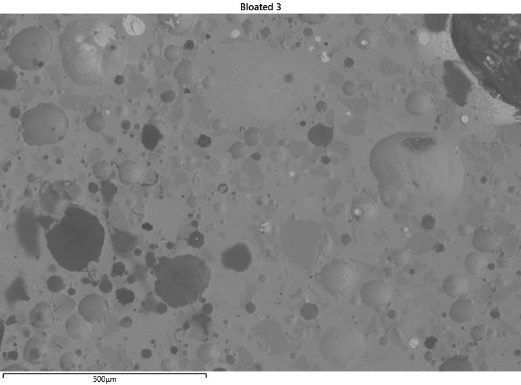 |
| 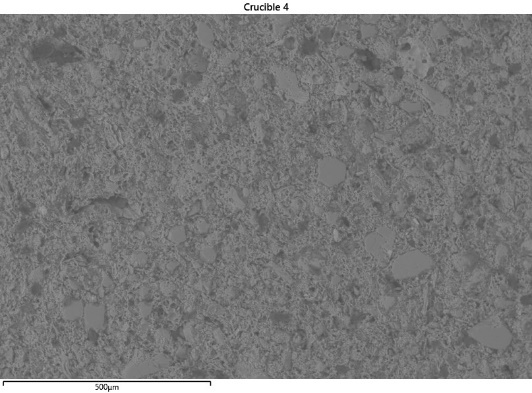 | 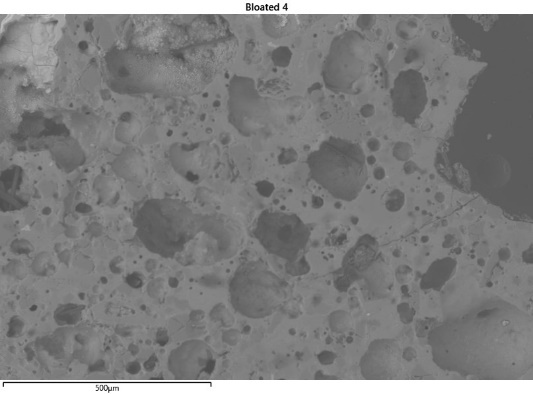 |
| 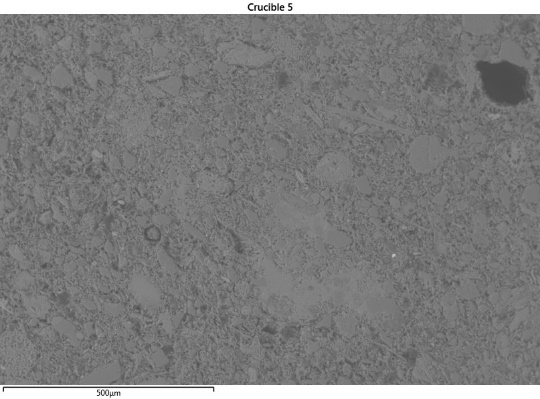 | 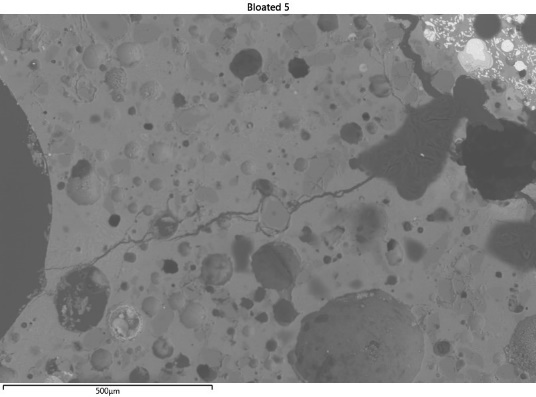 |

Fig. 8 Analysed crucible and bloated areas of sample TSRP115b - area at 100x magnification (c. 1mm2).

Table 5 Analyses carried out in sample TSRP115b

| **Description** | **Sp.** | **O** | **Mg** | **Al** | **Si** | **P** | **S** | **Cl** | **K** | **Ca** | **Fe** | **Ni** | **Cu** | **Zn** | **As** | **Ag** | **Sn** | **Sb** | **Pb** |
| --- | --- | --- | --- | --- | --- | --- | --- | --- | --- | --- | --- | --- | --- | --- | --- | --- | --- | --- | --- |
| **Image 1** |  |  |  |  |  |  |  |  |  |  |  |  |  |  |  |  |  |  |  |
| High-Sn prill | 213 |  |  |  |  |  |  |  |  |  | 0.1 | 0.1 | 64.7 |  |  |  | 33.1 | 0.9 | 1.2 |
| High-Sn prill | 214 |  |  |  |  |  |  |  |  |  |  | 0.2 | 64.0 |  | 0.1 |  | 33.4 | 1.0 | 1.4 |
| High-Sn prill | 215 |  |  |  |  |  |  |  |  |  |  | 0.3 | 70.0 |  | 0.3 |  | 26.3 | 1.2 | 1.9 |
| High-Sn prill | 216 |  |  |  |  |  |  |  |  |  |  | 0.2 | 55.5 |  |  |  | 43.1 | 1.1 | 0.1 |
| High-Sn prill | 217 |  |  |  |  |  |  |  |  |  |  | 0.1 | 51.5 |  | 0.2 |  | 42.0 | 1.5 | 4.5 |
| High-Sn prill | 218 |  |  |  |  |  |  |  |  |  |  | 0.2 | 56.3 |  | 0.1 |  | 40.5 | 1.2 | 1.4 |
| High-Sn prill | 219 |  |  |  |  |  |  |  |  |  |  |  | 40.5 |  | 0.1 |  | 52.4 | 1.7 | 5.3 |
| High-Sn prill | 220 |  |  |  |  |  |  |  |  |  |  | 0.2 | 53.7 |  | 0.2 |  | 42.6 | 1.9 | 1.5 |
| High-Sn prill | 221 |  |  |  |  |  |  |  |  |  |  | 0.3 | 60.6 |  | 0.2 |  | 36.8 | 1.4 | 0.8 |
| **Image 2** |  |  |  |  |  |  |  |  |  |  |  |  |  |  |  |  |  |  |  |
| High-Sn prill | 222 |  |  |  |  |  |  |  |  |  |  | 0.3 | 57.2 |  | 0.1 |  | 39.6 | 1.4 | 1.5 |
| High-Sn prill | 223 |  |  |  |  |  |  |  |  |  |  |  | 73.9 |  |  |  | 22.8 | 0.5 | 2.8 |
| Cu-Sn prill | 224 |  |  |  |  |  |  | 0.2 | 0.2 |  | 0.2 | 0.3 | 83.9 | 0.1 |  | 0.1 | 12.8 | 0.4 | 1.8 |
| Cu-Sn prill | 225 | 1.4 |  |  |  |  | 0.1 | 0.3 | 0.2 |  | 0.1 | 0.1 | 81.5 | 0.1 | 0.1 | 0.1 | 13.6 | 0.7 | 2.0 |
| **Image 3** |  |  |  |  |  |  |  |  |  |  |  |  |  |  |  |  |  |  |  |
| Cu-Sn prill | 226 | 1.9 |  |  |  |  |  | 0.2 | 0.1 |  | 0.2 | 0.1 | 74.1 | 0.1 | 0.1 |  | 18.1 | 0.6 | 4.7 |
| High-Sn prill | 227 |  |  |  |  |  |  |  |  |  |  | 0.4 | 63.7 |  | 0.1 |  | 33.4 | 0.9 | 1.4 |
| **Image 4** |  |  |  |  |  |  |  |  |  |  |  |  |  |  |  |  |  |  |  |
| Cu-Sn prill | 228 | 2.0 |  |  |  |  | 0.1 | 0.1 | 0.1 |  | 0.3 | 0.1 | 80.4 | 0.1 | 0.2 |  | 10.8 | 0.6 | 5.3 |
| High-Sn prill | 229 |  |  |  |  |  |  |  |  |  |  | 0.3 | 57.7 |  | 0.2 |  | 38.6 | 1.2 | 2.1 |
| High-Sn prill | 230 |  |  |  |  |  |  |  |  |  |  | 0.2 | 63.5 |  | 0.2 |  | 33.9 | 1.0 | 1.2 |
| High-Sn prill | 231 |  |  |  |  |  |  |  |  |  |  | 0.1 | 64.3 |  | 0.1 |  | 33.4 | 1.0 | 1.2 |
| Cu-Sn prill | 232 |  |  |  |  |  |  | 0.1 | 0.1 |  | 0.1 | 0.1 | 85.7 | 0.3 | 0.2 | 0.1 | 9.4 | 0.5 | 3.4 |
| High-Sn prill | 233 |  |  |  |  |  |  |  |  |  |  | 0.2 | 53.6 |  | 0.1 |  | 43.3 | 1.1 | 1.7 |
| Sn oxide | 234 | 20.4 |  | 0.1 | 0.1 |  |  | 0.1 | 0.3 |  | 0.2 | 0.1 | 14.2 |  |  |  | 63.7 | 0.7 | 0.2 |
| **Image 5** |  |  |  |  |  |  |  |  |  |  |  |  |  |  |  |  |  |  |  |
| Cu-Sn prill | 235 | 5.2 |  | 0.1 | 0.1 |  | 0.1 | 0.1 | 0.1 |  | 0.1 | 0.1 | 65.1 | 0.2 | 0.2 |  | 19.1 | 0.6 | 9.0 |
| High-Sn prill | 236 |  |  |  |  |  |  |  |  |  | 0.2 | 0.2 | 60.0 |  | 0.1 |  | 37.6 | 0.9 | 0.9 |
| High-Sn prill | 237 |  |  |  |  |  |  |  |  |  | 0.2 | 0.0 | 59.3 |  | 0.1 |  | 37.4 | 0.8 | 2.2 |
| High-Sn prill | 238 |  |  |  |  |  |  |  |  |  |  | 0.2 | 63.3 |  | 0.2 |  | 33.5 | 0.9 | 1.9 |
| High-Sn prill | 239 |  |  |  |  |  |  |  |  |  | 0.2 | 0.1 | 55.6 |  | 0.1 |  | 43.0 | 0.8 | 0.3 |
| High-Sn prill | 240 |  |  |  |  |  |  |  |  |  | 0.5 | 0.4 | 62.1 |  | 0.1 |  | 34.5 | 0.9 | 1.5 |
| Cu oxide | 241 | 34.9 | 0.1 | 0.2 | 0.2 | 0.1 | 0.1 | 0.1 |  | 0.1 | 0.7 |  | 62.8 |  | 0.2 |  |  |  | 0.5 |
| High-Sn prill | 242 |  |  |  |  |  |  |  |  |  | 0.3 | 0.3 | **61.5** |  | 0.1 |  | **35.3** | 1.0 | 1.6 |
| High-Sn prill | 243 |  |  |  |  |  |  |  |  |  | 0.4 | 0.1 | **54.7** |  | 0.2 |  | **42.1** | 1.0 | 1.6 |
| **Image 6** |  |  |  |  |  |  |  |  |  |  |  |  |  |  |  |  |  |  |  |
| Cu-Sn prill | 244 | 33.9 | 0.3 | 0.2 | 4.2 | 4.0 |  | 0.1 | 0.1 | 3.6 | 0.2 | 0.1 | 14.9 |  | 0.1 | 0.3 | 26.6 | 0.9 | 10.6 |
| Cu oxide | 245 | 31.9 |  |  | 0.3 | 0.2 | 3.0 |  |  | 0.3 | 0.7 |  | 59.8 | 0.2 | 0.1 | 0.1 | 0.6 | 0.1 | 2.6 |
| Cu oxide | 246 | 34.4 |  |  | 0.1 | 0.2 | 0.2 |  |  | 0.1 | 0.5 |  | 62.8 | 0.1 | 0.1 |  | 0.1 | 0.1 | 1.4 |
| **Image 7** |  |  |  |  |  |  |  |  |  |  |  |  |  |  |  |  |  |  |  |
| Cu oxide | 247 | 35.1 |  | 0.2 | 0.1 | 0.4 | 0.3 | 0.1 |  | 0.3 | 0.5 |  | 61.5 | 0.2 | 0.1 |  |  |  | 1.2 |
| Cu oxide | 248 | 33.6 | 0.1 | 0.3 | 0.5 | 0.2 | 0.1 | 0.1 |  | 0.3 | 1.2 |  | 60.5 | 1.2 | 0.1 |  |  | 0.1 | 1.4 |
| Cu oxide | 249 | 35.4 |  | 0.1 | 0.2 | 0.1 | 0.3 | 0.1 | 0.1 | 0.2 | 0.7 |  | 61.3 |  |  |  |  |  | 1.4 |

| 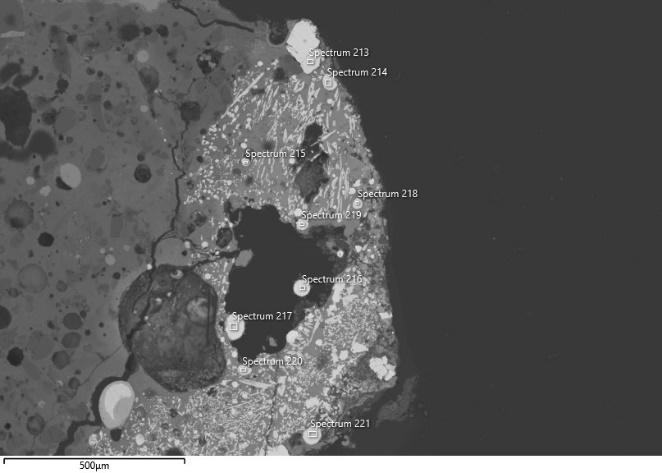 | 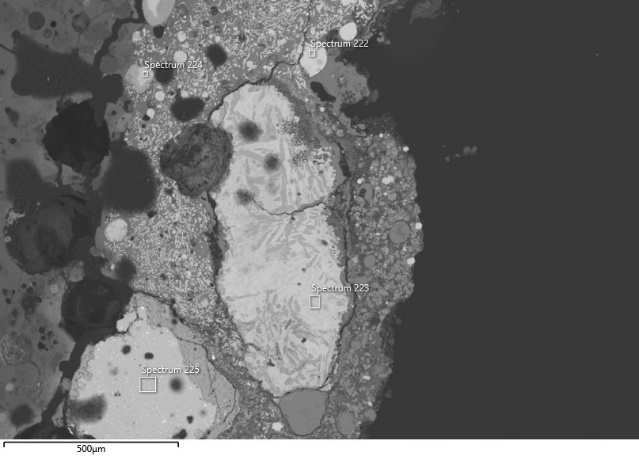 |
| --- | --- |
| Image 1 | Image 2 |
| 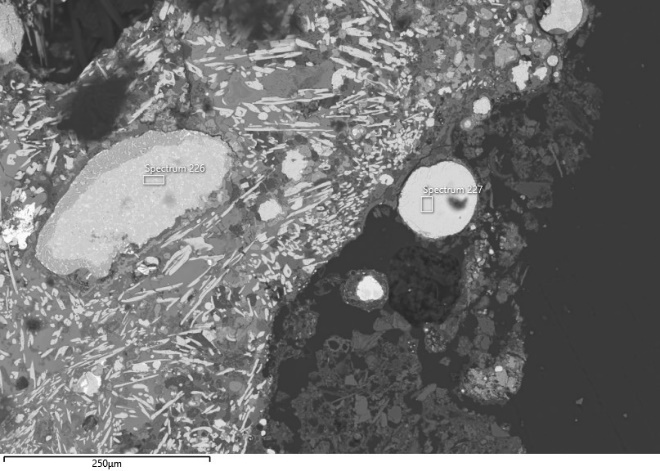 | 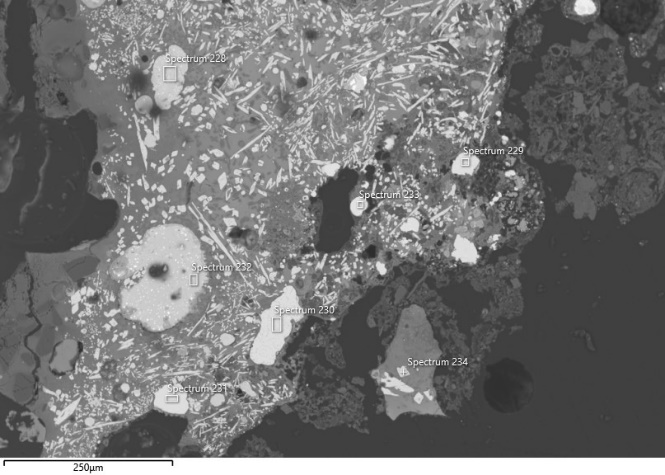 |
| Image 3 | Image 4 |
| 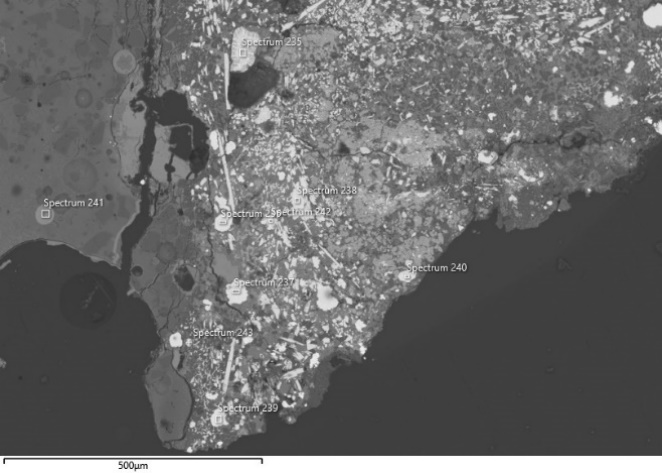 | 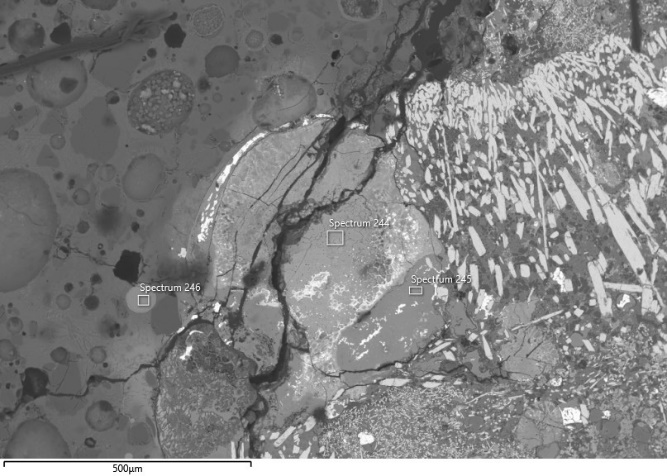 |
| Image 5 | Image 6 |
| 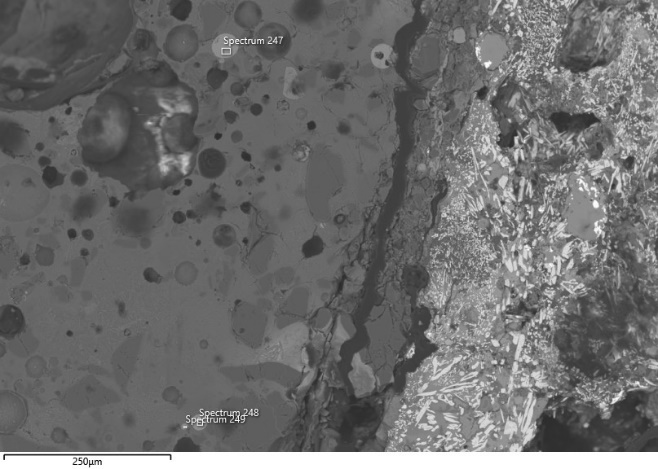 |  |
| Image 7 |  |

Fig. 9 Locations of the analyses performed on specimen TSRP115b. The corresponding analytical results are reported in the table above.

#### TSRP149

| Bloated areas | Metal-rich areas |
| --- | --- |
| 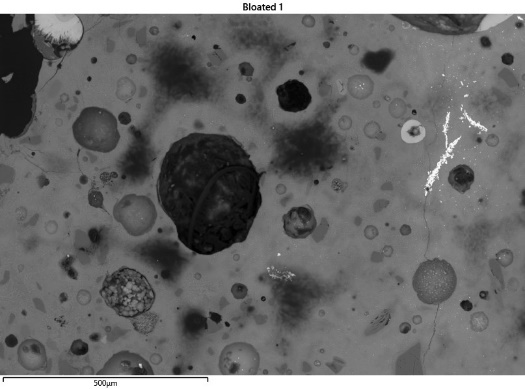 | 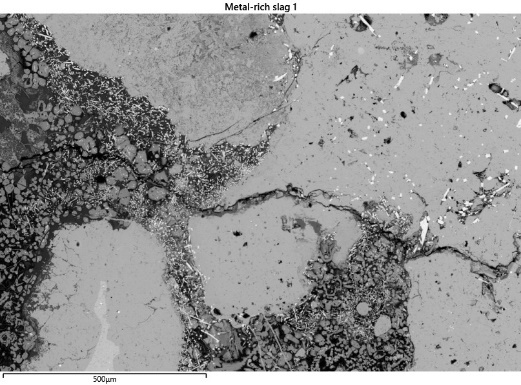 |
| 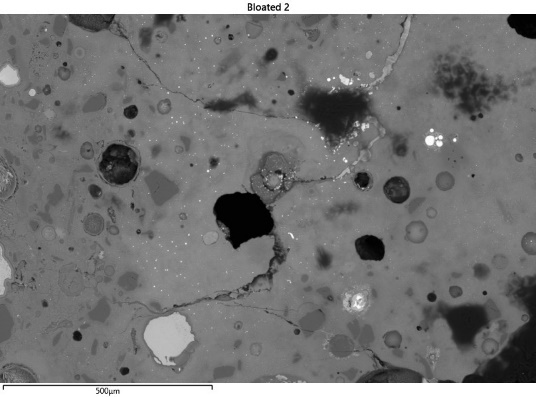 | 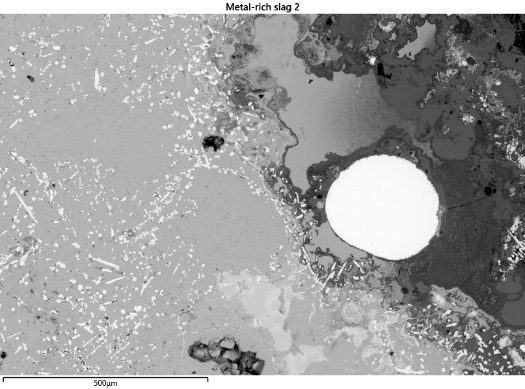 |
| 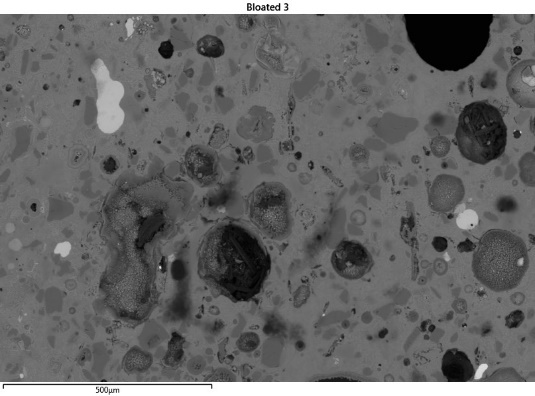 | 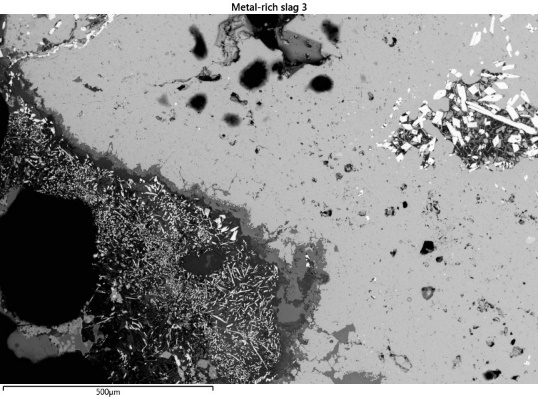 |
| 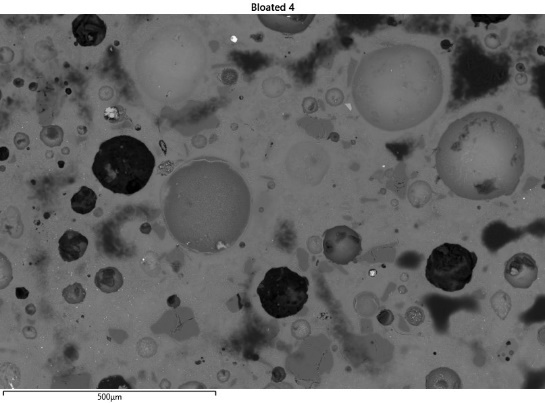 | 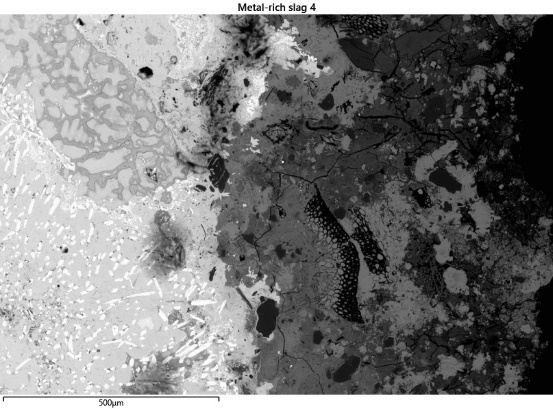 |
| 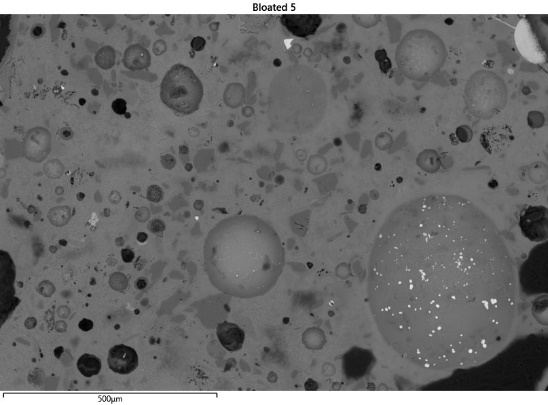 | 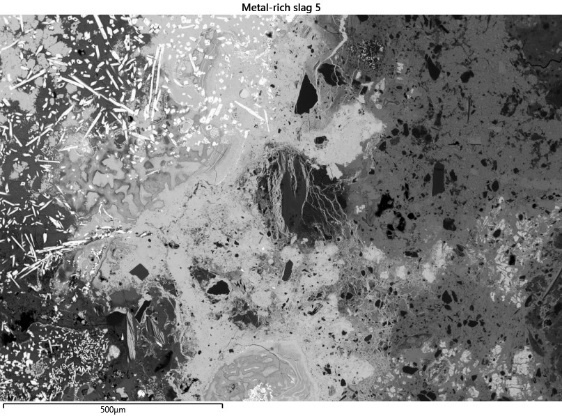 |

Fig. 10 Analysed crucible and bloated areas of sample TSRP149 - area at 100x magnification (c. 1mm2).

Table 6 Analyses carried out on sample TSRP149

| **Description** | **Sp.** | **O** | **Mg** | **Al** | **Si** | **P** | **S** | **Cl** | **K** | **Ca** | **Fe** | **Ni** | **Cu** | **Zn** | **As** | **Ag** | **Sn** | **Sb** | **Pb** |
| --- | --- | --- | --- | --- | --- | --- | --- | --- | --- | --- | --- | --- | --- | --- | --- | --- | --- | --- | --- |
| **Image 1** |  |  |  |  |  |  |  |  |  |  |  |  |  |  |  |  |  |  |  |
| Cu-Sn prill phase | 94 |  |  |  |  |  |  |  |  |  |  |  | 97.2 | 0.1 |  |  | 2.3 | 0.1 |  |
| Cu-Sn oxidised phase | 95 | 17.8 |  | 0.2 | 1.4 |  | 0.1 | 0.2 | 0.1 |  | 0.8 |  | 61.7 |  |  |  | 17.3 | 0.3 | 0.2 |
| Cu-Sn prill phase | 96 | 1.5 | 0.1 |  | 0.1 |  |  | 0.1 | 0.1 |  |  | 0.1 | 68.4 | 0.1 |  |  | 28.7 | 0.6 | 0.3 |
| **Image 2** |  |  |  |  |  |  |  |  |  |  |  |  |  |  |  |  |  |  |  |
| Cu-Sn prill phase | 97 | 1.6 |  | 0.1 | 0.1 |  |  | 0.1 | 0.1 |  |  | 0.2 | 60.5 | 0.1 |  |  | 36.7 | 0.5 | 0.1 |
| Cu-Sn oxidised phase | 98 | 26.3 |  |  | 0.6 |  | 0.2 | 0.1 | 0.2 |  | 0.1 | 0.3 | 13.3 | 0.1 | 0.1 |  | 57.3 | 0.6 | 0.9 |
| **Image 3** |  |  |  |  |  |  |  |  |  |  |  |  |  |  |  |  |  |  |  |
| High-Sn prill phase | 99 |  |  |  |  |  |  |  |  |  |  | 0.1 | 56.2 |  | 0.1 | 0.0 | 43.0 | 0.5 | 0.1 |
| High-Sn prill phase | 100 |  |  |  |  |  |  |  |  |  |  | 0.0 | 37.3 |  | 0.1 | 0.0 | 61.7 | 1.0 | 0.0 |
| **Image 4** |  |  |  |  |  |  |  |  |  |  |  |  |  |  |  |  |  |  |  |
| Cu prill phase | 101 | 1.5 | 0.1 |  | 0.1 |  | 0.3 | 0.1 |  |  |  |  | 95.9 |  | 0.1 |  | 1.7 | 0.1 | 0.1 |
| **Image 5** |  |  |  |  |  |  |  |  |  |  |  |  |  |  |  |  |  |  |  |
| Cu-Sn oxidised phase | 102 | 12.1 |  | 0.2 | 0.4 | 0.3 | 0.7 | 0.5 |  |  | 0.1 |  | 82.0 |  |  |  | 3.4 | 0.2 | 0.1 |
| Fe oxide | 103 | 27.6 | 2.5 | 1.0 | 0.1 |  |  | 0.1 | 0.1 | 0.2 | 59.9 | 0.1 | 1.8 | 1.4 |  |  | 5.3 |  |  |
| Fe oxide | 104 | 25.5 | 2.8 | 1.2 | 0.2 | 0.1 |  | 0.1 | 0.2 | 0.4 | 58.3 | 0.3 | 1.9 | 1.8 |  |  | 7.2 | 0.1 |  |
| Fe oxide | 105 | 27.2 | 2.5 | 0.9 | 0.1 |  |  | 0.1 |  | 0.2 | 57.6 | 0.3 | 2.1 | 1.5 |  |  | 7.5 |  |  |
| Fe oxide | 106 | 1.8 | 0.1 |  | 0.1 |  | 0.2 | 0.2 |  | 0.1 | 5.4 |  | 91.4 | 0.2 |  | 0.1 | 0.1 |  | 0.2 |
| Fe oxide | 107 | 26.3 | 2.3 | 0.4 | 0.1 |  |  | 0.1 | 0.1 | 0.2 | 62.3 | 0.5 | 2.6 | 1.2 |  |  | 3.8 |  | 0.1 |
| **Image 6** |  |  |  |  |  |  |  |  |  |  |  |  |  |  |  |  |  |  |  |
| Fe oxide | 108 | 26.8 | 2.8 | 1.1 |  |  |  | 0.1 |  | 0.1 | 62.6 | 0.6 | 2.3 | 0.9 |  |  | 2.7 | 0.1 |  |
| Sn oxide | 109 | 21.7 |  |  | 0.1 |  |  | 0.1 | 0.3 |  | 1.0 |  | 0.9 | 0.1 |  |  | 75.2 | 0.7 |  |
| ??? | 110 | 28.7 | 3.1 | 1.3 | 0.1 |  |  | 0.1 | 0.1 | 0.1 | 54.4 | 0.2 | 2.2 | 1.1 |  | 0.1 | 8.8 |  |  |
| **Image 7** |  |  |  |  |  |  |  |  |  |  |  |  |  |  |  |  |  |  |  |
| Malayaite | 111 | 31.9 | 0.8 | 2.1 | 7.9 |  |  |  | 0.1 | 17.5 | 1 |  |  |  |  |  | 28.8 | 0.7 |  |
| Malayaite | 112 | 38.3 | 2.5 | 4.5 | 18.2 | 1.9 |  | 0.1 | 5.9 | 11.8 | 10.5 |  | 0.3 | 0.4 |  | 0.1 | 5.4 | 0.2 | 0.1 |
| Malayaite | 113 | 34.7 | 1.5 | 1.6 | 13.4 | 0.3 |  | 0.1 | 0.1 | 19.0 | 11.2 |  | 0.2 |  |  |  | 17.1 | 0.7 |  |
| **Image 8** |  |  |  |  |  |  |  |  |  |  |  |  |  |  |  |  |  |  |  |
| Malayaite | 114 | 31.4 | 0.8 | 2.2 | 7.8 | 0.1 |  | 0.1 | 0.2 | 17.6 | 9.5 |  | 0.1 |  |  |  | 29.1 | 1.1 |  |
| Malayaite | 115 | 33.2 | 1.3 | 1.5 | 10.4 | 0.1 |  | 0.1 | 0.1 | 18.5 | 9.9 | 0.1 | 0.2 | 0.1 |  |  | 23.7 | 1.0 |  |
| Malayaite | 116 | 35.9 | 2.0 | 1.8 | 13.4 | 0.4 |  | 0.1 | 0.2 | 19.4 | 9.7 |  | 0.4 |  |  |  | 16.1 | 0.6 | 0.1 |
| Cu prill oxidised | 117 | 10.6 |  |  | 0.1 |  |  | 0.3 |  | 0.1 | 0.3 |  | 88.3 | 0.1 |  |  | 0.1 | 0.1 |  |
| **Image 9** |  |  |  |  |  |  |  |  |  |  |  |  |  |  |  |  |  |  |  |
| Malayaite | 118 | 29.7 | 0.6 | 2.4 | 7.3 |  |  | 0.1 | 0.1 | 17.7 | 10.2 |  | 0.5 | 0.1 |  |  | 30.4 | 0.9 |  |
| Malayaite | 119 | 29.6 |  | 0.1 | 10.1 | 0.2 |  | 0.1 | 0.2 | 13.9 | 0.4 | 0.1 | 0.6 |  |  |  | 43.5 | 1.1 |  |
| Cu prill oxidised | 120 | 9.2 |  | 0.1 |  |  |  | 0.3 |  | 0.1 | 0.5 |  | 89.3 | 0.2 |  |  | 0.2 | 0.1 |  |
| Sn oxide | 121 | 21.9 |  |  | 0.1 |  |  | 0.1 | 0.3 |  | 0.1 | 0.1 | 0.3 |  | 0.1 |  | 76.3 | 0.7 |  |
| **Image 10** |  |  |  |  |  |  |  |  |  |  |  |  |  |  |  |  |  |  |  |
| Malayaite | 122 | 29.7 | 0.6 | 2.1 | 6.6 |  |  | 0.1 | 0.2 | 17.2 | 11.0 | 0.1 | 0.6 |  |  |  | 30.6 | 1.3 |  |
| Cu prill oxidised | 123 | 9.3 |  |  | 0.1 |  |  | 0.2 | 0.1 | 0.2 | 1.0 |  | 88.8 |  | 0.1 |  | 0.2 |  |  |
| Malayaite | 124 | 36.8 | 2.9 | 4.1 | 18.6 | 1.8 | 0.3 | 0.1 | 6.0 | 14.8 | 6.6 | 0.2 | 5.9 | 0.2 |  | 0.1 | 0.5 | 0.4 | 1.0 |
| **Image 11** |  |  |  |  |  |  |  |  |  |  |  |  |  |  |  |  |  |  |  |
| Malayaite | 135 | 37.4 | 4.1 | 2.8 | 19.3 | 0.5 |  | 0.1 |  | 16.3 | 14.2 |  | 0.9 | 0.1 |  |  | 3.8 | 0.3 | 0.2 |
| Inclusion | 136 | 29.4 |  | 9.9 | 0.3 | 7.6 | 2.6 |  |  | 1.1 | 4.1 |  | 7.3 | 0.1 | 0.2 |  | 4.8 | 0.2 | 32.6 |
| Malayaite | 137 | 38.7 | 4.8 | 2.6 | 18.6 | 0.9 |  |  | 0.1 | 15.7 | 12.9 |  | 0.7 | 0.1 |  |  | 4.5 | 0.3 |  |
| ???? | 138 | 36.2 | 0.2 | 6.7 | 25.6 | 0.8 | 0.2 | 0.2 | 0.1 | 2.3 | 2.5 |  | 22.3 | 0.1 |  |  | 2.5 | 0.1 | 0.2 |
| ???? | 139 | 25.6 | 0.2 | 6.0 | 24.9 | 0.5 | 0.1 | 0.2 | 0.1 | 2.4 | 3.3 | 0.1 | 34.6 | 0.1 |  |  | 1.7 |  | 0.1 |
| **Image 12** |  |  |  |  |  |  |  |  |  |  |  |  |  |  |  |  |  |  |  |
| Malayaite | 140 | 37.6 | 2.2 | 3.0 | 16.9 | 1.6 |  | 0.1 | 1.8 | 13.7 | 16.0 |  | 0.7 | 0.2 |  |  | 5.9 | 0.3 | 0.2 |
| Malayaite | 141 | 29.0 | 0.6 | 2.7 | 7.3 |  |  | 0.1 | 0.2 | 18.1 | 9.3 |  |  |  |  |  | 31.5 | 1.2 |  |

| 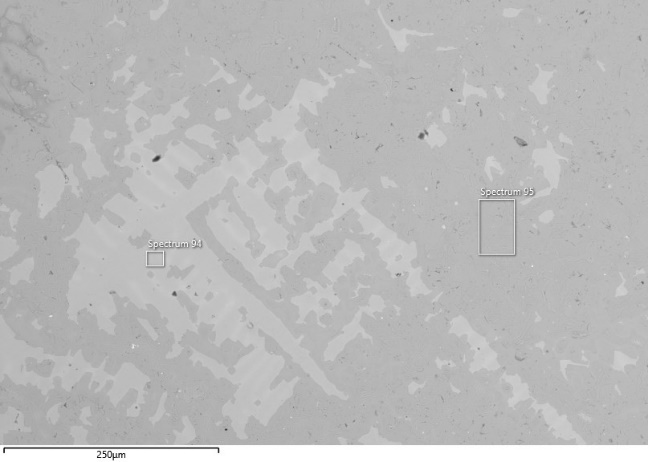 | 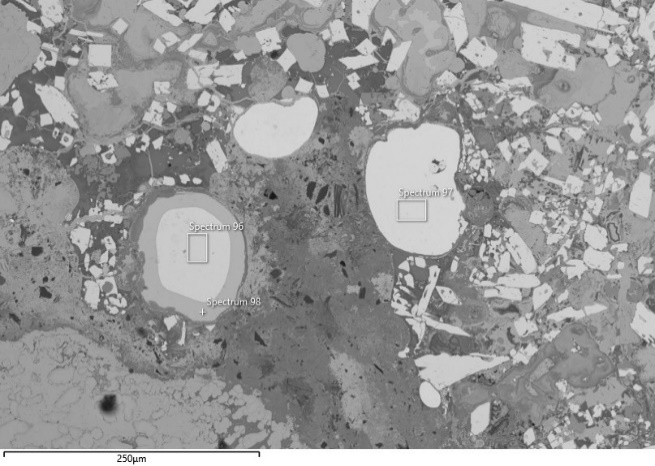 |
| --- | --- |
| Image 1 | Image 2 |
| 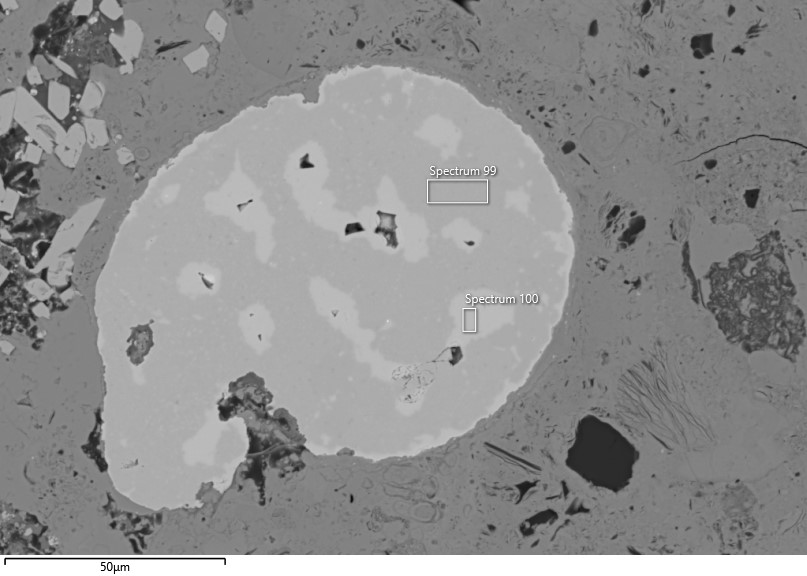 | 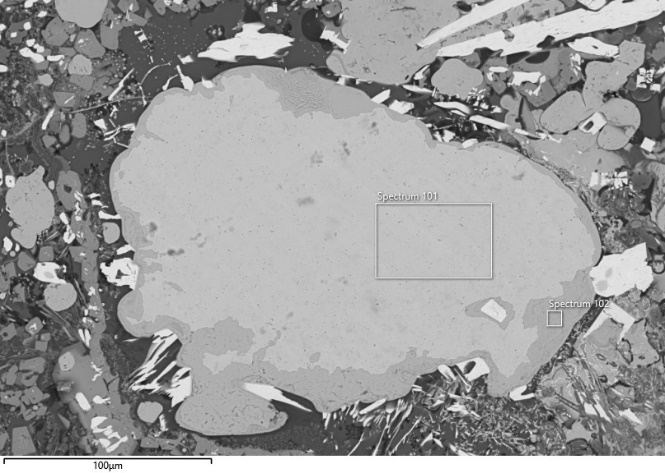 |
| Image 3 | Image 4 |
| 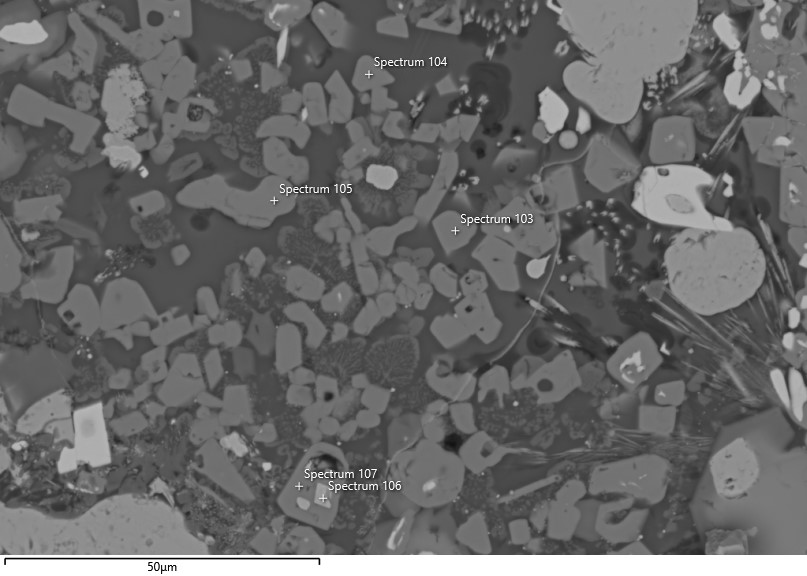 | 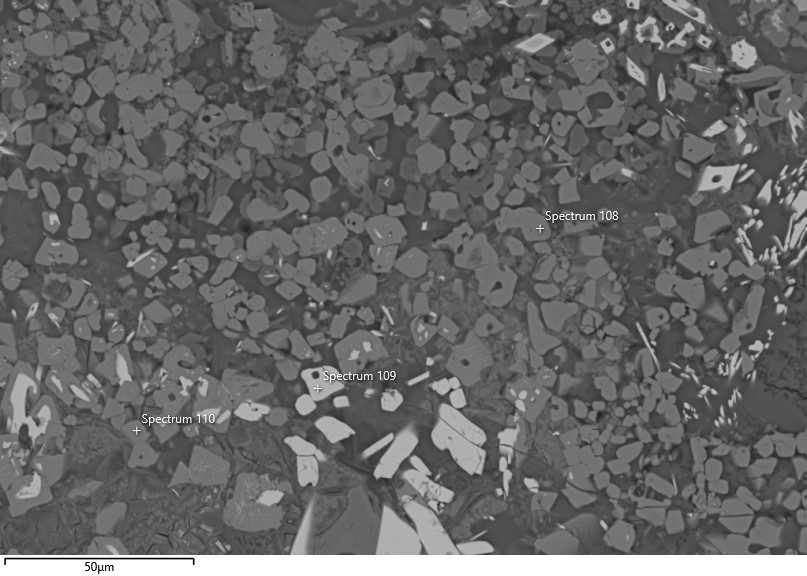 |
| Image 5 | Image 6 |
| 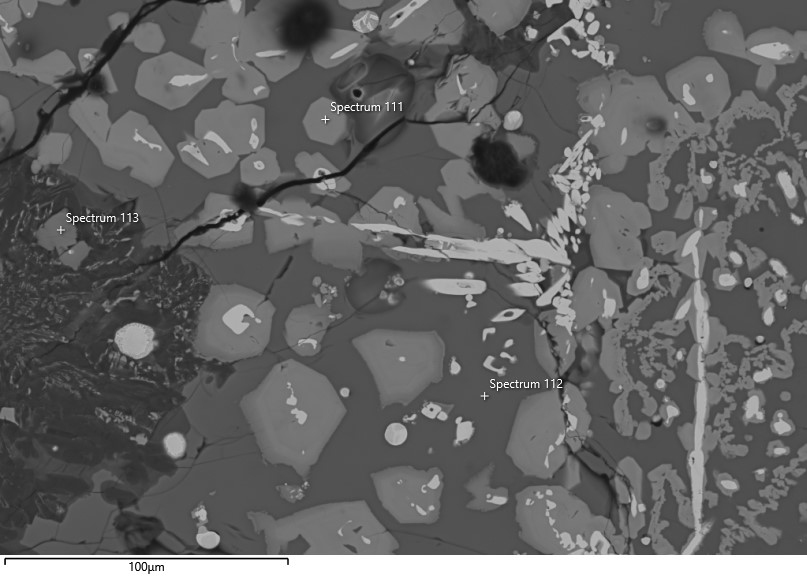 |  |
| Image 7 | Image 8 |
|  |  |
| Image 9 | Image 10 |
|  |  |
| Image 11 | Image 12 |

Fig. 11 Locations of the analyses performed on specimen TSRP149. The corresponding analytical results are reported in the table above.

#### TSRP91a

| Crucible/bloated areas | Metal-rich areas |
| --- | --- |
|  |  |
|  |  |
|  |  |
|  |  |
|  |  |

Fig. 12 Analysed crucible and bloated areas of sample TSRP91a - area at 100x magnification (c. 1mm2).

Table 7 Analyses carried out on sample TSRP91a

| Description | Sp. | O | Na | Mg | Al | Si | P | S | Cl | K | Ca | Fe | Co | Ni | Cu | As | Ag | Sn | Sb | Pb |
| --- | --- | --- | --- | --- | --- | --- | --- | --- | --- | --- | --- | --- | --- | --- | --- | --- | --- | --- | --- | --- |
| **Image 1** |  |  |  |  |  |  |  |  |  |  |  |  |  |  |  |  |  |  |  |  |
| High-Sn prill | 6 |  |  |  |  |  |  |  |  |  |  | 0.3 |  | 0.2 | 59.0 | 0.3 |  | 38.5 | 1.5 | 0.2 |
| High-Sn prill | 7 |  |  |  |  |  |  |  |  |  |  | 0.3 |  | 0.3 | 59.6 | 0.1 | 0.1 | 38.4 | 1.1 | 0.2 |
| High-Sn prill | 8 |  |  |  |  |  |  |  |  |  |  | 0.7 |  | 0.2 | 56.8 | 0.2 |  | 40.7 | 1.2 | 0.2 |
| **Image 2** |  |  |  |  |  |  |  |  |  |  |  |  |  |  |  |  |  |  |  |  |
| High-Sn prill | 9 |  |  |  |  |  |  |  |  |  |  | 0.2 |  | 0.3 | 61.2 | 0.3 |  | 36.8 | 1.1 | 0.2 |
| High-Sn prill | 10 |  |  |  |  |  |  |  |  |  |  | 0.6 |  | 0.2 | 59.5 | 0.3 |  | 38.4 | 0.9 | 0.1 |
| High-Sn prill | 11 |  |  |  |  |  |  |  |  |  |  | 0.7 |  | 0.2 | 62.3 | 0.3 |  | 35.3 | 1.0 | 0.3 |
| High-Sn prill | 12 |  |  |  |  |  |  |  |  |  |  | 0.2 |  | 0.1 | 61.8 | 0.4 |  | 36.3 | 1.0 | 0.1 |
| **Image 3** |  |  |  |  |  |  |  |  |  |  |  |  |  |  |  |  |  |  |  |  |
| Malayaite | 13 | 26.1 | 4.4 |  | 0.1 |  |  |  | 0.2 |  | 16.4 | 1.6 |  |  | 0.7 |  |  | 46.0 | 4.5 |  |
| Malayaite | 14 | 31.3 | 7.7 | 0.2 | 2.6 | 4.2 |  |  | 0.1 |  | 14.9 | 8.5 |  |  | 0.5 |  |  | 30.1 |  |  |
| Malayaite | 15 | 29.9 | 0.6 | 0.4 | 4.3 | 4.3 |  |  | 0.1 |  | 16.5 | 6.2 |  |  | 0.7 |  |  | 37.1 |  |  |
| Cu-Sn oxide | 16 | 24.1 |  |  | 1.5 | 7.4 | 0.6 |  | 0.1 | 0.3 | 3.9 | 2.6 | 0.2 | 0.2 | 35.5 |  |  | 22.5 | 1.1 |  |
| **Image 4** |  |  |  |  |  |  |  |  |  |  |  |  |  |  |  |  |  |  |  |  |
| Malayaite | 17 | 28.0 |  | 0.5 | 4.1 | 4.2 |  |  | 0.1 |  | 16.7 | 6.9 |  |  | 0.3 |  |  | 37.2 | 2.0 |  |
| Malayaite | 18 | 43.1 |  | 3.6 | 2.3 | 17.3 | 4.8 |  |  | 0.9 | 7.0 | 4.5 |  |  | 16.8 |  |  |  |  |  |
| **Image 5** |  |  |  |  |  |  |  |  |  |  |  |  |  |  |  |  |  |  |  |  |
| High-Sn prill | 19 |  |  |  |  |  |  |  |  |  |  | 1.3 | 0.7 | 0.6 | 55.5 | 0.1 |  | 40.4 | 1.3 | 0.3 |
| High-Sn prill | 20 |  |  |  |  |  |  |  |  |  |  | 1.7 |  | 0.5 | 54.9 | 0.1 |  | 41.3 | 1.4 | 0.1 |
| High-Sn prill | 21 |  |  |  |  |  |  |  |  |  |  | 0.2 | 0.5 | 1.0 | 56.1 | 0.2 |  | 40.2 | 1.5 | 0.3 |
| High-Sn prill | 22 |  |  |  |  |  |  |  |  |  |  | 0.6 | 0.5 | 0.7 | 55.5 | 0.2 |  | 41.0 | 1.5 | 0.0 |
| **Image 6** |  |  |  |  |  |  |  |  |  |  |  |  |  |  |  |  |  |  |  |  |
| Cu oxide phase | 23 | 34.4 |  |  |  |  | 0.2 |  |  |  |  | 0.1 |  | 0.1 | 65.1 | 0.1 | 0.1 |  | 0.0 | 0.0 |
| High-Sn prill phase | 24 |  |  |  |  |  |  |  |  |  |  |  |  | 0.2 | 67.4 | 0.2 |  | 30.5 | 1.4 | 0.3 |
| **Image 7** |  |  |  |  |  |  |  |  |  |  |  |  |  |  |  |  |  |  |  |  |
| Cu oxide phase | 25 | 34.0 |  |  |  | 0.1 | 0.3 |  | 0.1 |  | 0.2 | 0.3 |  | 0.1 | 64.8 | 0.1 |  |  |  |  |
| Cu oxide phase | 26 | 29.5 |  |  |  | 15.3 | 0.7 |  |  |  | 1.4 | 2.5 |  | 0.1 | 49.9 | 0.4 |  |  |  | 0.2 |
| High-Sn prill phase | 27 |  |  |  |  |  |  |  | 0.1 |  |  | 0.2 | 0.6 | 0.6 | 63.7 | 0.9 |  | 32.1 | 1.7 | 0.2 |
| **Image 8** |  |  |  |  |  |  |  |  |  |  |  |  |  |  |  |  |  |  |  |  |
| Cu oxide phase | 28 | 34.5 |  |  |  | 0.3 | 0.6 |  |  |  | 0.4 | 0.4 |  | 0.1 | 63.4 | 0.0 |  |  | 0.0 | 0.2 |
| **Image 9** |  |  |  |  |  |  |  |  |  |  |  |  |  |  |  |  |  |  |  |  |
| Cu Sn phase | 1 | 6.7 |  |  |  | 0.7 |  |  |  |  |  | 0.3 |  |  | 57.0 |  |  | 33.8 | 1.5 |  |
| Cu Sn phase | 2 | 31.2 |  |  | 0.8 | 7.0 | 0.8 | 0.1 | 0.1 |  |  | 2.2 |  | 0.0 | 24.4 | 0.2 |  | 32.5 | 0.5 | 0.2 |
| Cu Sn phase | 3 | 2.5 |  |  |  |  |  |  | 0.1 |  |  |  |  | 0.4 | 61.8 | 0.2 |  | 33.8 | 1.3 | 0.1 |
| **Image 10** |  |  |  |  |  |  |  |  |  |  |  |  |  |  |  |  |  |  |  |  |
| Cu oxide phase | 4 | 30.7 |  |  |  |  | 0.3 |  |  |  | 0.2 | 0.2 |  | 0.1 | 68.4 |  |  |  |  |  |
| Cu Sn phase | 5 |  |  |  |  | 0.1 |  |  | 0.1 |  |  |  |  | 0.2 | 85.3 | 0.2 | 0.1 | 13.5 | 0.5 |  |
| Cu Sn phase | 6 | 2.3 |  |  |  |  |  |  | 0.1 |  |  |  |  | 0.2 | 66.9 | 0.2 | 0.1 | 28.8 | 1.2 | 0.3 |
| **Image 11** |  |  |  |  |  |  |  |  |  |  |  |  |  |  |  |  |  |  |  |  |
| High-Sn prill | 7 |  |  |  |  |  |  |  |  |  |  | 0.3 |  | 0.0 | 72.9 | 0.2 |  | 25.8 | 0.6 | 0.1 |
| High-Sn prill | 8 |  |  |  |  |  |  |  |  |  |  | 0.4 |  | 0.1 | 70.2 | 0.5 |  | 27.8 | 0.8 | 0.2 |
| High-Sn prill | 9 |  |  |  |  |  |  |  |  |  |  | 0.6 |  | 0.0 | 70.8 | 0.3 |  | 27.5 | 0.6 | 0.1 |
| High-Sn prill | 10 |  |  |  |  |  |  |  |  |  |  | 0.5 |  | 0.1 | 65.1 | 0.2 |  | 33.2 | 0.7 | 0.2 |
| Cu-Sn prill | 11 | 5.0 |  |  |  |  |  |  |  |  |  | 1.7 |  | 0.0 | 77.1 | 0.4 |  | 15.5 | 0.2 | 0.1 |
| High-Sn prill | 12 |  |  |  |  |  |  |  |  |  |  | 0.8 |  | 0.1 | 64.3 | 0.4 |  | 33.5 | 0.7 | 0.2 |
| **Image 12** |  |  |  |  |  |  |  |  |  |  |  |  |  |  |  |  |  |  |  |  |
| Cu oxide | 13 | 31.4 |  |  |  | 0.2 | 1.3 |  |  |  | 0.6 | 0.2 |  | 0.0 | 66.1 | 0.1 |  |  |  |  |
| **Image 13** |  |  |  |  |  |  |  |  |  |  |  |  |  |  |  |  |  |  |  |  |
| Cu-Sn prill | 14 |  |  |  |  | 0.1 |  |  | 0.1 |  |  | 0.3 |  | 0.1 | 89.5 | 0.1 | 0.1 | 9.2 | 0.4 | 0.2 |
| Cu-Sn prill | 15 |  |  |  |  | 0.1 |  |  | 0.1 |  |  | 0.4 |  | 0.1 | 90.1 | 0.1 |  | 8.8 | 0.3 | 0.0 |
| Cu-Sn prill | 16 |  |  |  |  |  |  |  | 0.1 |  |  | 0.2 |  | 0.1 | 83.6 | 0.1 |  | 15.2 | 0.5 | 0.2 |
| High-Sn prill | 17 |  |  |  |  |  |  |  |  |  |  |  |  | 0.1 | 72.7 | 0.2 |  | 26.2 | 0.6 | 0.2 |
| Cu-Sn prill | 18 |  |  |  |  |  |  |  |  |  |  | 0.3 |  | 0.1 | 86.7 | 0.1 | 0.1 | 12.0 | 0.3 | 0.5 |
| **Image 14** |  |  |  |  |  |  |  |  |  |  |  |  |  |  |  |  |  |  |  |  |
| High-Sn prill | 19 |  |  |  |  |  |  |  | 0.1 |  |  | 0.2 |  | 0.3 | 57.1 | 0.2 |  | 40.7 | 1.3 | 0.1 |
| High-Sn prill | 20 |  |  |  |  |  |  |  |  |  |  |  |  | 0.4 | 57.5 | 0.2 |  | 40.3 | 1.5 | 0.2 |
| High-Sn prill | 21 |  |  |  |  |  |  |  |  |  |  |  |  | 0.2 | 55.9 | 0.2 |  | 42.2 | 1.3 | 0.2 |
| High-Sn prill | 22 |  |  |  |  |  |  |  |  |  |  |  |  | 0.3 | 57.3 | 0.1 |  | 40.6 | 1.4 | 0.3 |
| Cu-Sn prill | 23 | 1.7 |  |  |  |  |  |  |  |  |  | 0.2 |  | 0.1 | 83.3 | 0.0 | 0.0 | 14.3 | 0.3 | 0.1 |
| Cu-Sn prill | 24 |  |  |  |  |  |  | 0.1 |  |  |  | 0.3 |  | 0.2 | 90.9 | 0.2 | 0.1 | 7.6 | 0.4 | 0.3 |
| High-Sn prill | 25 |  |  |  |  |  |  |  |  |  |  |  |  | 0.2 | 63.5 | 0.1 |  | 34.6 | 0.9 | 0.7 |
| **Image 15** |  |  |  |  |  |  |  |  |  |  |  |  |  |  |  |  |  |  |  |  |
| High-Sn prill | 27 |  |  |  |  |  |  |  |  |  |  |  |  | 0.0 | 73.9 | 0.2 |  | 25.2 | 0.6 | 0.1 |
| High-Sn prill | 28 |  |  |  |  |  |  |  |  |  |  |  |  | 0.2 | 68.1 | 0.2 |  | 30.3 | 1.1 | 0.1 |
| **Image 16** |  |  |  |  |  |  |  |  |  |  |  |  |  |  |  |  |  |  |  |  |
| Cu oxide | 29 | 20.2 |  |  |  |  |  |  |  |  |  | 0.2 |  |  | 0.5 |  |  | 79.2 |  |  |
| Cu | 30 | 1.5 |  |  |  |  |  |  | 0.1 |  |  |  |  | 0.1 | 98.0 | 0.1 | 0.2 |  |  |  |
| Cu oxide | 31 | 31.7 |  |  |  | 0.2 | 0.7 | 0.1 | 0.1 |  | 0.6 | 0.4 |  |  | 66.2 |  |  |  |  |  |
| **Image 17** |  |  |  |  |  |  |  |  |  |  |  |  |  |  |  |  |  |  |  |  |
| High-Sn prill | 32 |  |  |  |  |  |  |  | 0.1 |  |  |  |  | 0.1 | 72.6 | 0.2 |  | 26.1 | 0.8 | 0.1 |
| High-Sn prill | 33 |  |  |  |  |  |  |  |  |  |  | 0.2 | 0.4 | 0.2 | 70.5 | 0.1 | 0.1 | 27.6 | 0.9 | 0.2 |
| High-Sn prill | 34 |  |  |  |  |  |  |  |  |  |  |  |  | 0.1 | 72.3 | 0.2 | 0.1 | 26.3 | 0.9 | 0.1 |
| Cu-Sn prill | 35 |  |  |  |  |  |  | 0.1 |  |  |  | 0.6 |  | 0.8 | 80.0 | 0.2 | 0.1 | 17.4 | 0.8 | 0.0 |
| High-Sn prill | 36 |  |  |  |  |  |  |  |  |  |  | 0.7 |  |  | 71.2 | 0.2 |  | 27.0 | 0.8 | 0.1 |
| **Image 18** |  |  |  |  |  |  |  |  |  |  |  |  |  |  |  |  |  |  |  |  |
| Cu-Sn prill | 37 |  |  |  |  |  |  |  |  |  |  |  |  | 0.2 | 81.5 | 0.1 | 0.1 | 17.2 | 0.8 | 0.2 |
| Malayaite | 38 | 25.2 |  | 0.2 | 2.3 | 5.4 |  |  |  | 0.2 | 18.0 | 11.6 |  |  | 1.0 |  |  | 34.6 | 1.4 | 0.1 |
| Malayaite | 39 | 26.3 |  |  | 2.4 | 4.7 |  |  |  |  | 17.7 | 12.1 |  |  | 0.6 |  |  | 36.3 |  |  |
| **Image 19** |  |  |  |  |  |  |  |  |  |  |  |  |  |  |  |  |  |  |  |  |
| Cu | 55 |  |  |  |  |  |  |  |  |  |  |  |  |  | 99.8 |  | 0.1 | 0.0 |  | 0.1 |
| Cu oxide | 56 | 33.0 |  |  | 0.8 | 0.4 | 0.7 |  | 0.1 |  | 0.5 | 0.6 |  |  | 63.7 |  | 0.1 | 0.1 |  | 0.1 |
| Malayaite | 57 | 32.8 |  |  | 1.6 | 15.6 | 1.3 | 0.4 | 0.1 |  | 10.6 | 0.6 |  |  | 35.8 |  |  | 0.9 | 0.4 |  |
| Malayaite | 58 | 26.9 |  | 0.3 | 4.0 | 4.3 |  |  |  |  | 17.1 | 7.8 |  |  | 1.0 |  |  | 36.2 | 2.3 | 0.0 |
| Malayaite | 59 | 21.7 |  |  |  |  |  |  |  |  | 18.3 | 0.7 |  |  | 0.9 | 0.1 |  | 55.7 | 2.5 | 0.0 |
| Malayaite | 60 | 27.3 |  | 1.1 | 2.5 | 6.3 |  |  |  |  | 17.7 | 7.6 |  |  | 1.0 |  |  | 34.5 | 1.9 | 0.1 |
| **Image 20** |  |  |  |  |  |  |  |  |  |  |  |  |  |  |  |  |  |  |  |  |
| Cu Sn oxide | 61 | 35.8 |  |  |  |  |  |  |  |  |  | 4.2 |  |  | 17.7 | 0.6 |  | 40.5 | 0.9 | 0.3 |
| Cu Sn oxide | 62 | 10.4 |  |  |  |  |  |  |  |  |  | 1.0 |  | 0.2 | 51.5 | 0.2 | 0.1 | 35.0 | 1.1 | 0.5 |
| **Image 21** |  |  |  |  |  |  |  |  |  |  |  |  |  |  |  |  |  |  |  |  |
| Cu Sn prill | 63 |  |  |  |  |  |  |  |  |  |  |  |  |  | 80.5 | 0.1 |  | 18.7 | 0.5 | 0.2 |
| High-Sn prill | 64 |  |  |  |  |  |  |  |  |  |  |  |  | 0.2 | 72.5 | 0.3 |  | 26.0 | 0.7 | 0.2 |
| High-Sn prill | 65 |  |  |  |  |  |  |  |  |  |  |  |  | 0.1 | 72.8 | 0.1 | 0.1 | 26.0 | 0.8 | 0.2 |
| High-Sn prill | 66 |  |  |  |  |  |  |  | 0.1 |  |  |  |  | 0.1 | 78.6 | 0.2 | 0.1 | 20.3 | 0.5 | 0.1 |
| High-Sn prill | 67 |  |  |  |  |  |  |  |  |  |  | 0.1 |  | 0.1 | 70.9 | 0.1 | 0.0 | 27.5 | 1.0 | 0.3 |
| High-Sn prill | 68 |  |  |  |  |  |  |  |  |  |  | 0.2 | 0.5 | 0.1 | 69.4 | 0.1 | 0.0 | 28.7 | 0.8 | 0.2 |

|  |  | |
| --- | --- | --- |
| Image 1 | Image 2 | |
|  |  | |
| Image 3 | Image 4 | |
|  |  | |
| Image 5 | Image 6 | |
|  |  | |
| Image 7 | Image 8 | |
|  | |  |
| Image 9 | | Image 10 |
|  | |  |
| Image 11 | | Image 12 |
|  | |  |
| Image 13 | | Image 14 |
|  | |  |
| Image 15 | | Image 16 |
|  | |  |
| Image 17 | | Image 18 |
|  | |  |
| Image 19 | | Image 20 |
|  | |  |
| Image 21 | |  |

Fig. 13 Locations of the analyses performed on specimen TSRP91a. The corresponding analytical results are reported in the table above.

### **Bulk composition**

This section provides the bulk composition of both the ceramic areas (Table 7) and the bloated areas (Table…8) of the crucibles. Additionally, the bulk composition of the slagged-bronze areas analysed in crucible TSRP149 is presented (Table 9). Furthermore, the ratios of elements to Al2O3 for ceramic areas (Table 10), bloated areas (Table 11), metal-rich areas (Table 12) are detailed. Table 13 highlights the changes in elemental ratios between these distinct zones.

The investigation followed the established methodology developed by Rademaker (2015 and references therein). The study focused on comparing the outer ceramic zone, which is less affected by thermal processes, with the inner bloated zone, which undergoes significant morphological and chemical changes due to exposure to high temperatures. This comparison allows for a deeper understanding of the thermal degradation and transformation within the material. The methodology involved analyzing five disSnct areas from each zone, with each area corresponding to the visible field at 100x magnification (±1mm²).

Table 8 Average bulk composition of the crucible ceramic areas in the crucibles investigated. All results in wt%, normalised to 100%

| **Sample** | **Na2O** | **MgO** | **Al2O₃** | **SiO2** | **P2O5** | **SO₃** | **K2O** | **CaO** | **TiO2** | **MnO** | **FeO** | **CuO** | **ZnO** | **As3O** | **Ag2O** | **SnO** | **Sb₂O₃** | **PbO** |
| --- | --- | --- | --- | --- | --- | --- | --- | --- | --- | --- | --- | --- | --- | --- | --- | --- | --- | --- |
| **TSRP91** | **1.5** | **3.5** | **14.2** | **58.6** | **0.7** | **0.6** | **2.5** | **11.9** | **0.7** | **0.1** | **5.0** | **0.3** |  |  | **0.1** | **0.3** | **0.2** | **0.1** |
| σ (5ms) | 0.1 |  | 0.3 | 3.1 | 0.2 | 0.2 | 0.2 | 2.0 | 0.1 |  | 0.4 | 0.1 | 0.1 |  | 0.1 | 0.1 | 0.1 | 0.1 |
| Min | 1.3 | 3.4 | 13.7 | 55.0 | 0.5 | 0.4 | 2.2 | 9.4 | 0.5 | 0.1 | 4.6 | 0.2 |  |  |  | 0.2 | 0.1 |  |
| Max | 1.6 | 3.5 | 14.5 | 61.9 | 0.9 | 0.9 | 2.6 | 14.0 | 0.9 | 0.2 | 5.7 | 0.5 | 0.1 |  | 0.2 | 0.4 | 0.3 | 0.2 |
| **TSRP124** | **1.8** | **3.5** | **13.0** | **62.5** | **0.4** | **0.7** | **3.1** | **8.9** | **0.7** | **0.1** | **4.2** | **0.3** | **0.1** |  | **0.1** | **0.3** | **0.4** | **0.1** |
| σ (1ms) |  |  |  |  |  |  |  |  |  |  |  |  |  |  |  |  |  |  |
| Min |  |  |  |  |  |  |  |  |  |  |  |  |  |  |  |  |  |  |
| Max |  |  |  |  |  |  |  |  |  |  |  |  |  |  |  |  |  |  |
| **TSRP115b** | **1.2** | **2.5** | **13.9** | **56.9** | **0.8** | **0.3** | **2.4** | **15.1** | **0.7** | **0.2** | **5.1** | **0.4** |  |  |  | **0.1** | **0.3** | **0.2** |
| σ (5ms) | 0.2 | 0.3 | 0.6 | 1.3 | 0.1 | 0.1 | 0.1 | 1.3 | 0.1 | 0.1 | 0.3 | 0.1 | 0.1 | 0.1 |  | 0.1 | 0.1 | 0.1 |
| Min | 1.0 | 2.2 | 13.4 | 55.6 | 0.7 | 0.3 | 2.3 | 13.7 | 0.5 | 0.1 | 4.8 | 0.2 |  |  |  | 0.1 | 0.2 |  |
| Max | 1.4 | 2.7 | 14.9 | 58.9 | 0.9 | 0.5 | 2.4 | 17.0 | 0.9 | 0.3 | 5.5 | 0.6 | 0.1 | 0.1 | 0.1 | 0.2 | 0.4 | 0.3 |
| **TSRP115a** | **1.2** | **2.6** | **14.1** | **55.9** | **1.0** | **0.8** | **2.5** | **15.2** | **0.7** | **0.1** | **4.9** | **0.4** |  |  |  | **0.3** | **0.4** | **0.1** |
| σ (5ms) | 0.1 | 0.3 | 0.4 | 0.6 | 0.2 | 0.1 | 0.1 | 0.6 | 0.1 |  | 0.3 | 0.1 |  |  |  | 0.1 | 0.1 | 0.1 |
| Min | 1.1 | 2.2 | 13.6 | 55.0 | 0.6 | 0.7 | 2.2 | 14.5 | 0.6 | 0.1 | 4.5 | 0.3 |  |  |  | 0.3 | 0.2 |  |
| Max | 1.4 | 2.9 | 14.6 | 56.4 | 1.2 | 1.0 | 2.6 | 15.9 | 0.7 | 0.2 | 5.1 | 0.5 |  |  | 0.1 | 0.4 | 0.5 | 0.2 |

Table 9 Average bulk composition of the crucible bloated areas in the 4 crucibles investigated. All results in wt%, normalised to 100%

| Sample | Na2O | MgO | Al2O₃ | SiO2 | P2O5 | SO₃ | K2O | CaO | TiO2 | MnO | FeO | CuO | ZnO | As3O | Ag2O | SnO | Sb₂O₃ | PbO |
| --- | --- | --- | --- | --- | --- | --- | --- | --- | --- | --- | --- | --- | --- | --- | --- | --- | --- | --- |
| **TSRP91** | **1.7** | **3.6** | **13.6** | **61.1** | **0.2** | **0.1** | **3.0** | **9.6** | **0.7** | **0.1** | **5.0** | **0.8** | **0.1** |  |  | **0.2** |  | **0.1** |
| σ (5ms) | 0.2 | 0.1 | 0.3 | 0.3 | 0.1 | 0.1 | 0.2 | 0.4 | 0.1 |  | 0.2 | 0.5 | 0.1 |  |  |  |  | 0.1 |
| Min | 1.5 | 3.5 | 13.3 | 60.7 | 0.1 |  | 2.8 | 9.1 | 0.6 | 0.1 | 4.7 | 0.3 |  |  |  | 0.2 |  |  |
| Max | 1.9 | 3.8 | 13.9 | 61.4 | 0.2 | 0.2 | 3.3 | 10.3 | 0.8 | 0.2 | 5.3 | 1.6 | 0.1 |  | 0.1 | 0.3 | 0.1 | 0.1 |
| **TSRP124** | **1.6** | **3.0** | **12.4** | **62.2** | **0.2** | **0.3** | **3.5** | **9.2** | **0.7** | **0.1** | **4.3** | **1.7** |  |  | **0.1** | **0.6** | **0.1** | **0.2** |
| σ (5ms) | 0.4 | 0.2 | 0.4 | 1.1 | 0.1 | 0.1 | 0.5 | 0.6 | 0.1 |  | 0.2 | 0.7 | 0.1 |  |  | 0.7 | 0.1 | 0.1 |
| Min | 1.3 | 2.7 | 11.8 | 60.5 | 0.1 | 0.2 | 2.7 | 8.4 | 0.6 | 0.1 | 4.1 | 0.9 |  |  |  | 0.2 |  | 0.1 |
| Max | 2.2 | 3.3 | 12.9 | 63.6 | 0.3 | 0.4 | 4.0 | 9.8 | 0.7 | 0.1 | 4.6 | 2.8 | 0.1 |  | 0.1 | 1.8 | 0.2 | 0.4 |
| **TSRP115b** | **1.9** | **3.4** | **12.9** | **65.2** | **0.4** | **0.3** | **2.8** | **3.7** | **0.7** | **0.1** | **5.8** | **1.5** | **0.2** |  |  | **0.6** |  | **0.5** |
| σ (5ms) | 0.1 | 0.4 | 0.4 | 0.9 | 0.2 | 0.2 | 0.3 | 0.3 | 0.1 | 0.1 | 1.5 | 0.8 | 0.1 |  |  | 0.5 |  | 0.3 |
| Min | 1.7 | 3.0 | 12.3 | 63.8 | 0.2 | 0.1 | 2.4 | 3.3 | 0.6 | 0.1 | 4.8 | 0.7 | 0.1 |  |  | 0.2 |  | 0.2 |
| Max | 2.0 | 4.0 | 13.3 | 66.0 | 0.7 | 0.7 | 3.2 | 4.1 | 0.8 | 0.2 | 8.5 | 2.7 | 0.3 |  | 0.1 | 1.5 | 0.1 | 0.7 |
| **TSRP115a** | **1.6** | **3.1** | **13.8** | **58.7** | **0.4** | **0.3** | **2.4** | **8.7** | **0.7** | **0.1** | **5.8** | **3.5** | **0.1** |  |  | **0.3** | **0.1** | **0.4** |
| σ (5ms) | 0.3 | 0.4 | 0.4 | 3.8 | 0.1 | 0.1 | 0.1 | 4.2 | 0.1 |  | 0.7 | 2.2 | 0.1 |  |  | 0.2 | 0.1 | 0.1 |
| Min | 1.3 | 2.6 | 13.3 | 54.3 | 0.3 | 0.2 | 2.3 | 3.2 | 0.6 | 0.1 | 5.1 | 0.9 | 0.1 |  |  | 0.1 |  | 0.2 |
| Max | 2.0 | 3.6 | 14.4 | 63.1 | 0.6 | 0.5 | 2.5 | 12.2 | 0.8 | 0.2 | 6.8 | 6.8 | 0.2 |  | 0.1 | 0.6 | 0.3 | 0.5 |
| **TSRP149** | **1.7** | **3.3** | **12.5** | **59.4** | **0.5** | **0.1** | **3.3** | **8.7** | **0.6** | **0.1** | **5.4** | **3.0** | **0.1** |  |  | **1.0** | **0.2** | **0.1** |
| σ (5ms) | 0.1 | 0.2 | 0.9 | 2.9 | 0.3 |  | 0.7 | 1.1 | 0.1 | 0.1 | 0.5 | 1.3 | 0.1 |  | 0.1 | 0.8 | 0.1 | 0.1 |
| Min | 1.6 | 3.1 | 11.6 | 54.9 | 0.2 | 0.1 | 2.6 | 7.2 | 0.5 | 0.1 | 4.9 | 1.9 |  |  |  | 0.3 |  |  |
| Max | 1.9 | 3.6 | 13.7 | 61.5 | 0.8 | 0.2 | 4.4 | 10.1 | 0.8 | 0.2 | 6.0 | 5.0 | 0.2 |  | 0.1 | 2.1 | 0.4 | 0.3 |

Table 10 Average bulk composition of the slagged-bronze areas in crucible TSRP149 and TSRP91a. All results in wt%, normalised to 100%

| Sample | Na2O | MgO | Al2O₃ | SiO2 | P2O5 | SO₃ | K2O | CaO | TiO2 | MnO | FeO | CuO | ZnO | As3O | Ag2O | SnO | Sb₂O₃ | PbO |
| --- | --- | --- | --- | --- | --- | --- | --- | --- | --- | --- | --- | --- | --- | --- | --- | --- | --- | --- |
| **TSRP149** |  | **0.6** | **2.7** | **11.6** | **0.8** | **1.0** | **0.2** | **1.3** | **0.1** |  | **1.8** | **68.2** | **0.1** |  |  | **11.0** | **0.4** | **0.3** |
| σ (5ms) |  | 0.3 | 1.5 | 5.4 | 0.5 | 0.9 | 0.1 | 1.2 | 0.1 |  | 0.8 | 7.5 | 0.1 |  | 0.1 | 1.4 | 0.5 | 0.2 |
| Min |  | 0.1 | 0.7 | 2.9 | 0.4 | 0.1 |  | 0.3 |  |  | 0.8 | 80 |  |  |  | 9.0 |  | 0.1 |
| Max |  | 1.0 | 4.9 | 17.6 | 1.6 | 2.3 | 0.3 | 3.2 | 0.1 | 0.1 | 2.9 | 60. | 0.3 |  | 0.1 | 12.3 | 1.1 | 0.6 |
| **TSRP91a** |  | **0.6** | **7.8** | **28.7** | **5.3** | **1.1** | **3.6** | **6.1** | **0.3** | **0.0** | **4.5** | **33.6** | **0.1** |  |  | **7.7** | **0.4** | **0.2** |
| σ (5ms) |  | 0.2 | 2.9 | 5.1 | 0.9 | 1.3 | 2.2 | 2.4 | 0.1 |  | 1.9 | 7.1 |  |  |  | 5.4 | 0.2 | 0.1 |
| Min |  | 0.3 | 4.6 | 23.0 | 4.4 | 0.1 | 1.7 | 3.0 | 0.1 |  | 2.6 | 22.3 | 0.1 |  |  | 3.8 | 0.2 |  |
| Max |  | 2.9 | 39.1 | 143.6 | 26.5 | 5.5 | 17.8 | 30.4 | 1.3 | 0.1 | 22.7 | 167.9 | 0.5 | 0.1 | 0.1 | 38.5 | 2.1 | 0.8 |

Table 11 Ceramic areas. Ratio of oxides to Al2O3, metals removed.

| Sample |  |  |  |  |  |  |  |  |  |
| --- | --- | --- | --- | --- | --- | --- | --- | --- | --- |
| 91 | 0.11 | 0.25 | 4.14 | 0.05 | 0.17 | 0.84 | 0.05 | 0.01 | 0.35 |
| 124 | 0.14 | 0.27 | 4.81 | 0.03 | 0.24 | 0.68 | 0.05 | 0.01 | 0.33 |
| 115b | 0.09 | 0.18 | 4.09 | 0.06 | 0.17 | 1.08 | 0.05 | 0.01 | 0.37 |
| 115a | 0.09 | 0.18 | 3.96 | 0.07 | 0.17 | 1.08 | 0.05 | 0.01 | 0.35 |

Table 12 Bloated areas. Ratio of oxides to Al2O3, metals removed.

| Sample |  |  |  |  |  |  |  |  |  |
| --- | --- | --- | --- | --- | --- | --- | --- | --- | --- |
| 91 | 0.12 | 0.27 | 4.48 | 0.01 | 0.22 | 0.71 | 0.05 | 0.01 | 0.37 |
| 124 | 0.13 | 0.24 | 5.02 | 0.01 | 0.28 | 0.74 | 0.05 | 0.01 | 0.34 |
| 115b | 0.14 | 0.26 | 5.06 | 0.03 | 0.22 | 0.28 | 0.05 | 0.01 | 0.45 |
| 115a | 0.12 | 0.22 | 4.27 | 0.03 | 0.17 | 0.63 | 0.05 | 0.01 | 0.42 |
| 149 | 0.14 | 0.27 | 4.75 | 0.04 | 0.26 | 0.69 | 0.05 | 0.01 | 0.43 |

Table 13 Metal-rich areas. Ratio of oxides to Al2O3, metals removed.

| Sample |  |  |  |  |  |  |  |  |  |
| --- | --- | --- | --- | --- | --- | --- | --- | --- | --- |
| 149 | 0.00 | 0.20 | 4.25 | 0.29 | 0.06 | 0.48 | 0.03 | 0.01 | 0.66 |
| 91a | 0.00 | 0.07 | 3.67 | 0.68 | 0.45 | 0.78 | 0.03 | 0.00 | 0.58 |

Table 14 Change (in %) in ratio of oxides to Al2O3 between ceramic and bloated areas, metals removed.

| Sample |  |  |  |  |  |  |  |  |  |
| --- | --- | --- | --- | --- | --- | --- | --- | --- | --- |
| 91 | 9 | 8 | 8 | -80 | 29 | -15 | 0 | 0 | 6 |
| 124 | -7 | -11 | 4 | -67 | 17 | 9 | 0 | 0 | 3 |
| 115b | 56 | 44 | 24 | -50 | 29 | -74 | 0 | 0 | 22 |
| 115a | 33 | 22 | 8 | -57 | 0 | -42 | 0 | 0 | 20 |

### **Metal prills**

Table 15. A comprehensive list of high-tin prills identified in the in the bloated and slagged layers of the four samples (TSRP91, TSRP115b, TSRP149, TSRP91a), (*wt*%, data normalized to 100%).

| Sample | Type | Sp. | Fe | Co | Ni | **Cu** | As | Ag | **Sn** | Sb | Pb |
| --- | --- | --- | --- | --- | --- | --- | --- | --- | --- | --- | --- |
| 91a | Crucible | 6 | 0.3 |  | 0.2 | **59.0** | 0.3 |  | **38.5** | 1.5 | 0.2 |
| 7 | 0.3 |  | 0.3 | **59.6** | 0.1 | 0.1 | **38.4** | 1.1 | 0.2 |
| 8 | 0.7 |  | 0.2 | **56.8** | 0.2 |  | **40.7** | 1.2 | 0.2 |
| 9 | 0.2 |  | 0.3 | **61.2** | 0.3 |  | **36.8** | 1.1 | 0.2 |
| 10 | 0.6 |  | 0.2 | **59.5** | 0.3 |  | **38.4** | 0.9 | 0.1 |
| 11 | 0.7 |  | 0.2 | **62.3** | 0.3 |  | **35.3** | 1.0 | 0.3 |
| 12 | 0.2 |  | 0.1 | **61.8** | 0.4 |  | **36.3** | 1.0 | 0.1 |
| 19 | 1.3 | 0.7 | 0.6 | **55.5** | 0.1 |  | **40.4** | 1.3 | 0.3 |
| 20 | 1.7 |  | 0.5 | **54.9** | 0.1 |  | **41.3** | 1.4 | 0.1 |
| 21 | 0.2 | 0.5 | 1.0 | **56.1** | 0.2 |  | **40.2** | 1.5 | 0.3 |
| 22 | 0.6 | 0.5 | 0.7 | **55.5** | 0.2 |  | **41.0** | 1.5 | 0.0 |
| 24 |  |  | 0.2 | **67.4** | 0.2 |  | **30.5** | 1.4 | 0.3 |
| 27 | 0.2 | 0.6 | 0.6 | **63.7** | 0.9 |  | **32.1** | 1.7 | 0.2 |
| 7 | 0.3 |  | 0.0 | **72.9** | 0.2 |  | **25.8** | 0.6 | 0.1 |
| 8 | 0.4 |  | 0.1 | **70.2** | 0.5 |  | **27.8** | 0.8 | 0.2 |
| 9 | 0.6 |  |  | **70.8** | 0.3 |  | **27.5** | 0.6 | 0.1 |
| 10 | 0.5 |  | 0.1 | **65.1** | 0.2 |  | **33.2** | 0.7 | 0.2 |
| 12 | 0.8 |  | 0.1 | **64.3** | 0.4 |  | **33.5** | 0.7 | 0.2 |
| 17 |  |  | 0.1 | **72.7** | 0.2 |  | **26.2** | 0.6 | 0.2 |
| 19 | 0.2 |  | 0.3 | **57.1** | 0.2 |  | **40.7** | 1.3 | 0.1 |
| 20 |  |  | 0.4 | **57.5** | 0.2 |  | **40.3** | 1.5 | 0.2 |
| 21 |  |  | 0.2 | **55.9** | 0.2 |  | **42.2** | 1.3 | 0.2 |
| 22 |  |  | 0.3 | **57.3** | 0.1 |  | **40.6** | 1.4 | 0.3 |
| 25 |  |  | 0.2 | **63.5** | 0.1 |  | **34.6** | 0.9 | 0.7 |
| 27 |  |  | 0.0 | **73.9** | 0.2 |  | **25.2** | 0.6 | 0.1 |
| 28 |  |  | 0.2 | **68.1** | 0.2 |  | **30.3** | 1.1 | 0.1 |
| 32 |  |  | 0.1 | **72.6** | 0.2 |  | **26.1** | 0.8 | 0.1 |
| 33 | 0.2 | 0.4 | 0.2 | **70.5** | 0.1 | 0.1 | **27.6** | 0.9 | 0.2 |
| 34 |  |  | 0.1 | **72.3** | 0.2 | 0.1 | **26.3** | 0.9 | 0.1 |
| 36 | 0.7 |  |  | **71.2** | 0.2 |  | **27.0** | 0.8 | 0.1 |
| 64 |  |  | 0.2 | **72.5** | 0.3 |  | **26.0** | 0.7 | 0.2 |
| 65 |  |  | 0.1 | **72.8** | 0.1 | 0.1 | **26.0** | 0.8 | 0.2 |
| 66 |  |  | 0.1 | **78.6** | 0.2 | 0.1 | **20.3** | 0.5 | 0.1 |
| 67 | 0.1 |  | 0.1 | **70.9** | 0.1 |  | **27.5** | 1.0 | 0.3 |
| 68 | 0.2 | 0.5 | 0.1 | **69.4** | 0.1 |  | **28.7** | 0.8 | 0.2 |
| 91 | Crucible | 65 | 0.1 |  | 0.1 | **55.3** | 0.4 |  | **42.2** | 0.9 | 0.9 |
| 66 | 0.2 |  | 0.0 | **48.7** | 0.9 |  | **44.9** | 1.2 | 4.1 |
| 67 |  | 1.4 | 0.9 | **0.3** | 0.1 |  | **94.2** | 3.0 | 0.1 |
| 68 |  |  | 0.1 | **54.6** | 0.2 |  | **43.5** | 1.3 | 0.4 |
| 69 |  |  | 0.1 | **77.6** | 0.2 |  | **21.1** | 0.6 | 0.5 |
| 71 |  |  | 0.1 | **71.5** | 0.2 |  | **27.2** | 0.8 | 0.1 |
| 73 | 0.2 |  | 0.1 | **73.2** | 0.3 |  | **25.2** | 0.8 | 0.2 |
| 76 | 0.3 |  | 0.2 | **64.2** | 0.2 |  | **33.3** | 0.9 | 1.0 |
| 78 | 0.3 |  | 0.2 | **69.3** | 0.2 |  | **29.1** | 0.9 | 0.2 |
| 81 | 0.4 |  | 0.2 | **72.4** | 0.1 |  | **25.6** | 0.5 | 1.0 |
| 84 | 0.3 |  | 0.2 | **73.5** | 0.1 |  | **24.5** | 0.6 | 0.9 |
| 149 | Crucible | 99 |  |  | 0.1 | **56.2** | 0.1 |  | **43.0** | 0.5 | 0.1 |
| 100 |  |  | 0.0 | **37.3** | 0.1 |  | **61.7** | 1.0 |  |
| 115b | Crucible | 213 | 0.1 |  | 0.1 | **64.7** | 0.1 |  | **33.0** | 0.9 | 1.2 |
| 214 |  |  | 0.2 | **64.0** | 0.1 |  | **33.4** | 1.0 | 1.4 |
| 215 |  |  | 0.3 | **70.0** | 0.3 |  | **26.3** | 1.2 | 1.9 |
| 216 |  |  | 0.2 | **55.5** |  |  | **43.1** | 1.1 | 0.1 |
| 217 |  |  | 0.1 | **51.5** | 0.2 |  | **42.0** | 1.5 | 4.5 |
| 218 | 0.4 |  | 0.2 | **56.3** | 0.1 |  | **40.5** | 1.2 | 1.4 |
| 219 |  |  | 0.2 | **40.3** | 0.1 |  | **52.4** | 1.7 | 5.3 |
| 220 |  |  | 0.2 | **53.7** | 0.2 |  | **42.6** | 1.9 | 1.5 |
| 221 |  |  | 0.3 | **60.6** | 0.2 |  | **36.8** | 1.4 | 0.8 |
| 222 |  |  | 0.3 | **57.2** | 0.1 |  | **39.6** | 1.4 | 1.5 |
| 223 |  |  | 0.0 | **73.9** | 0.1 |  | **22.7** | 0.5 | 2.8 |
| 227 |  |  | 0.4 | **63.7** | 0.1 |  | **33.4** | 0.9 | 1.4 |
| 229 |  |  | 0.3 | **57.7** | 0.2 |  | **38.6** | 1.2 | 2.1 |
| 230 |  |  | 0.2 | **63.5** | 0.2 |  | **33.9** | 1.0 | 1.2 |
| 231 |  |  | 0.1 | **64.3** | 0.1 |  | **33.4** | 1.0 | 1.2 |
| 233 |  |  | 0.2 | **53.6** | 0.1 |  | **43.3** | 1.1 | 1.7 |
| 236 | 0.2 |  | 0.2 | **60.0** | 0.1 |  | **37.6** | 0.9 | 0.9 |
| 237 | 0.2 |  | 0.0 | **59.3** | 0.1 |  | **37.4** | 0.8 | 2.2 |
| 238 |  |  | 0.2 | **63.3** | 0.2 |  | **33.5** | 0.9 | 1.9 |
| 239 | 0.2 |  | 0.1 | **55.6** | 0.1 |  | **43.0** | 0.8 | 0.3 |
| 240 | 0.5 |  | 0.4 | **62.1** | 0.1 |  | **34.5** | 0.9 | 1.5 |
| 242 | 0.3 |  | 0.3 | **61.5** | 0.1 |  | **35.3** | 1.0 | 1.6 |
| 243 | 0.4 |  | 0.1 | **54.7** | 0.2 |  | **42.1** | 1.0 | 1.6 |

## **Secondary metal by-products**

#### TSRP19

|  |
| --- |

Fig. 14 Cross-section of sample TSRP19 before undergoing the mounSng and polishing processes.

Table 16 Analyses carried out on sample TSRP19

| **Description** | **Sp.** | **O** | **Mg** | **Al** | **Si** | **P** | **S** | **Cl** | **K** | **Ca** | **Fe** | **Ni** | **Cu** | **Zn** | **As** | **Ag** | **Sn** | **Sb** | **Pb** | **Bi** |
| --- | --- | --- | --- | --- | --- | --- | --- | --- | --- | --- | --- | --- | --- | --- | --- | --- | --- | --- | --- | --- |
| **Image 1** |  |  |  |  |  |  |  |  |  |  |  |  |  |  |  |  |  |  |  |  |
| Cu oxide | 32 | 9.9 |  |  | 0.1 |  | 0.1 | 0.2 |  |  |  |  | 88.7 |  | 0.2 |  | 0.5 | 0.2 |  |  |
| Cu sulphide | 33 |  |  |  |  |  | 19.6 |  |  |  | 0.1 |  | 79.6 |  |  | 0.2 |  | 0.1 | 0.3 |  |
| Inclusion | 34 | 13.9 |  | 0.1 | 0.3 | 0.1 | 0.6 | 1.0 | 0.5 | 0.8 | 0.5 |  | 10.1 |  | 0.3 | 0.2 | 7.2 | 2.2 | 8.0 | 54.1 |
| **Image 2** |  |  |  |  |  |  |  |  |  |  |  |  |  |  |  |  |  |  |  |  |
| Inclusion | 35 | 16.1 |  |  | 0.1 |  |  |  |  |  | 0.1 |  | 2.2 |  |  |  |  |  | 81.5 |  |
| Cu oxide | 36 | 11.1 |  |  | 0.1 |  |  | 0.3 |  |  | 0.1 | 0.1 | 87.2 |  | 0.1 |  | 0.7 | 0.2 |  |  |
| Cu sulphide | 37 |  |  |  |  |  | 20.8 | 0.1 |  |  | 0.1 |  | 76.7 | 0.2 |  | 0.2 | 0.7 | 0.2 | 0.9 |  |
| **Image 3** |  |  |  |  |  |  |  |  |  |  |  |  |  |  |  |  |  |  |  |  |
| Cu | 38 |  |  |  |  |  |  |  |  |  | 0.6 |  | 95.5 | 0.8 | 0.8 |  | 1.1 | 1.8 |  |  |
| Cu oxide | 39 | 11.0 |  |  |  |  |  | 0.2 |  |  |  |  | 88.6 | 0.1 |  |  |  |  | 0.1 |  |
| Cu sulphide | 40 |  |  |  |  |  | 20.9 |  |  |  | 0.3 |  | 77.2 | 0.1 |  | 0.2 | 0.3 | 0.1 | 0.8 |  |
| **Image 4** |  |  |  |  |  |  |  |  |  |  |  |  |  |  |  |  |  |  |  |  |
| Cu sulphide | 41 | 0.9 |  |  |  |  | 21.4 | 0.1 |  |  | 0.2 |  | 75.9 | 0.5 |  | 0.3 | 0.1 |  | 0.5 |  |
| Cu sulphide | 42 | 1.2 |  |  |  |  | 21.6 |  |  |  | 0.9 |  | 75.5 | 0.2 |  | 0.2 |  |  | 0.4 |  |
| Cu oxide | 43 | 10.7 | 0.1 |  |  |  |  | 0.2 |  |  | 0.1 | 0.1 | 88.4 | 0.1 | 0.1 |  | 0.1 | 0.1 | 0.1 |  |
| Cu sulphide | 44 |  |  |  |  |  | 21.1 |  |  |  |  |  | 78.2 |  |  |  |  | 0.1 | 0.6 |  |
| Cu sulphide | 45 | 1.0 |  |  |  |  | 20.7 |  |  |  |  |  | 77.6 |  |  |  | 0.1 | 0.3 | 0.3 |  |
| **Image 5** |  |  |  |  |  |  |  |  |  |  |  |  |  |  |  |  |  |  |  |  |
| Cu sulphide | 46 | 1.9 |  |  |  |  | 20.3 |  |  |  | 0.2 |  | 76.5 |  |  | 0.5 |  |  | 0.5 |  |
| Cu sulphide | 47 | 0.9 |  |  |  |  | 20.5 |  |  |  | 0.3 |  | 77.0 | 0.3 |  | 0.4 |  |  | 0.6 |  |
| Cu oxide | 48 | 10.1 | 0.1 | 0.1 | 0.1 |  |  | 0.2 |  |  |  |  | 89.2 | 0.2 |  |  | 0.1 |  |  |  |
| Cu sulphide | 49 | 1.0 |  |  |  |  | 20.6 |  |  |  | 0.4 |  | 76.7 |  |  | 0.5 |  |  | 0.7 |  |
| Cu sulphide | 50 | 0.8 |  |  |  |  | 20.8 | 0.1 |  |  | 0.4 |  | 76.7 | 0.7 |  |  |  |  | 0.6 |  |
| Cu oxide | 51 | 10.8 |  |  |  |  |  | 0.2 | 0.1 |  | 0.2 |  | 87.9 | 0.1 | 0.1 |  | 0.2 | 0.1 | 0.2 |  |
| **Image 6** |  |  |  |  |  |  |  |  |  |  |  |  |  |  |  |  |  |  |  |  |
| Cu oxide | 52 | 10.7 |  |  |  |  |  | 0.3 |  |  | 0.2 |  | 88.1 | 0.2 |  |  | 0.3 | 0.1 |  |  |
| Cu sulphide | 53 | 1.0 |  |  | 0.1 |  | 20.6 |  |  |  |  |  | 77.5 | 0.1 |  |  |  | 0.1 | 0.7 |  |
| Cu sulphide | 54 | 0.9 |  |  |  |  | 20.4 | 0.1 |  |  |  |  | 77.4 | 0.1 | 0.1 | 0.5 |  |  | 0.4 |  |
| Cu sulphide | 55 | 1.0 |  |  |  |  | 20.7 | 0.2 |  |  |  |  | 77.4 | 0.3 |  | 0.1 |  |  | 0.4 |  |
| Cu sulphide | 56 | 0.9 |  |  |  |  | 20.4 | 0.3 |  |  |  |  | 77.6 |  |  | 0.1 | 0.1 | 0.1 | 0.7 |  |
| **Image 7** |  |  |  |  |  |  |  |  |  |  |  |  |  |  |  |  |  |  |  |  |
| Cu sulphide | 57 | 1.2 |  |  |  |  | 20.9 | 0.1 |  |  | 0.5 |  | 76.3 | 0.6 |  |  |  |  | 0.4 |  |
| Cu sulphide | 58 | 1.1 |  |  |  |  | 20.6 |  |  |  | 0.3 |  | 77.0 | 0.2 |  | 0.3 |  |  | 0.5 |  |
| Cu oxide | 59 | 10.5 |  |  | 0.1 |  |  | 0.3 |  |  | 0.1 |  | 88.8 |  | 0.1 |  | 0.1 | 0.1 |  |  |
| Cu sulphide | 60 | 1.2 |  |  |  |  | 20.3 | 0.1 |  |  |  |  | 77.3 | 0.1 |  | 0.3 |  |  | 0.7 |  |
| Cu sulphide | 61 | 1.2 | 0.1 |  | 0.1 | 0.1 | 17.6 |  |  |  | 4.9 |  | 63.4 | 2.0 |  | 9.5 |  | 0.5 | 0.6 |  |
| Cu oxide | 62 | 10.9 |  |  | 0.1 |  | 0.8 | 0.3 |  |  | 0.2 |  | 87.0 | 0.1 |  |  | 0.3 | 0.2 | 0.1 |  |
| **Image 8** |  |  |  |  |  |  |  |  |  |  |  |  |  |  |  |  |  |  |  |  |
| Cu sulphide | 63 | 0.9 |  |  |  |  | 20.6 |  |  |  | 0.3 |  | 77.3 | 0.2 |  |  |  |  | 0.7 |  |
| Cu sulphide | 64 | 1.0 |  |  |  |  | 20.9 |  |  |  | 0.3 |  | 76.9 |  |  |  |  |  | 0.7 |  |
| Cu sulphide | 65 | 1.0 |  |  |  |  | 20.7 |  |  |  | 0.2 |  | 77.6 |  |  |  |  |  | 0.4 |  |
| Cu oxide | 66 | 11.0 |  |  |  |  | 0.1 |  |  |  | 0.2 |  | 86.8 | 0.3 | 0.1 |  | 0.6 | 0.2 | 0.1 |  |
| **Image 9** |  |  |  |  |  |  |  |  |  |  |  |  |  |  |  |  |  |  |  |  |
| Cu oxide | 67 | 10.7 |  |  |  |  | 0.3 | 0.3 |  |  | 0.1 |  | 87.5 |  | 0.1 |  | 0.4 | 0.2 | 0.3 |  |
| Cu sulphide | 68 | 0.8 |  |  |  |  | 20.5 |  |  |  | 0.1 |  | 77.5 | 0.2 |  | 0.2 |  |  | 0.7 |  |
| Cu sulphide | 69 | 1.0 |  |  |  |  | 20.5 | 0.1 |  |  | 0.2 |  | 76.9 | 0.2 |  | 0.3 |  |  | 0.6 |  |
| Cu sulphide | 70 | 1.3 |  |  |  |  | 20.7 |  |  |  | 0.4 |  | 76.6 | 0.4 |  | 0.2 |  |  | 0.6 |  |
| Cu oxide | 71 | 10.1 |  |  |  |  |  | 0.2 |  |  |  |  | 89.5 |  |  |  |  |  |  |  |

|  |  |
| --- | --- |
| Image 1 | Image 2 |
|  |  |
| Image 3 | Image 4 |
|  |  |
| Image 5 | Image 6 |
|  |  |
| Image 7 | Image 8 |
|  | Fig. 15 Locations of the analyses performed on specimen TSRP19. The corresponding analytical results are reported in the table above. |
| Image 9 |

#### TSRP46

|  |
| --- |

Fig. 16 Cross-section of sample TSRP46 before undergoing the mounting and polishing processes

Table 17 Analyses carried out on sample TSRP46

| **Description** | **Sp.** | **O** | **Mg** | **Al** | **Si** | **P** | **S** | **Cl** | **K** | **Ca** | **Fe** | **Ni** | **Cu** | **Zn** | **As** | **Ag** | **Sn** | **Sb** | **Pb** | **Bi** |
| --- | --- | --- | --- | --- | --- | --- | --- | --- | --- | --- | --- | --- | --- | --- | --- | --- | --- | --- | --- | --- |
| **Image 10** |  |  |  |  |  |  |  |  |  |  |  |  |  |  |  |  |  |  |  |  |
| Cu sulphide | 1 | 4.2 |  |  |  |  | 17.5 |  |  |  | 1.4 |  | 75.9 |  |  | 0.3 |  |  | 0.6 |  |
| Cu sulphide | 2 | 3.3 |  |  |  |  | 19.0 |  |  |  | 1.7 |  | 75.6 |  |  | 0.2 |  |  | 0.6 |  |
| Cu oxide | 3 | 13.6 |  |  |  |  |  | 0.6 |  |  | 0.8 |  | 83.9 | 0.1 | 0.6 | 0.1 |  |  | 0.4 |  |
| Cu oxide | 4 | 12.1 |  |  |  |  | 0.2 | 0.6 |  |  | 0.7 |  | 83.9 |  | 1.2 | 0.1 |  | 0.1 | 1.6 |  |
| **Image 11** |  |  |  |  |  |  |  |  |  |  |  |  |  |  |  |  |  |  |  |  |
| Cu oxide | 5 | 10.7 |  |  |  |  |  | 0.3 |  |  | 0.3 |  | 88.6 |  |  | 0.1 |  |  | 0.1 |  |
| Cu sulphide | 6 | 1.2 |  |  |  |  | 21.1 | 0.1 |  |  | 0.2 |  | 76.3 | 0.1 |  | 0.2 |  | 0.2 | 0.9 |  |
| Cu oxide | 7 | 10.6 |  |  |  |  |  | 0.3 |  |  | 0.2 |  | 88.3 | 0.1 | 0.3 |  | 0.1 |  |  |  |
| **Image 12** |  |  |  |  |  |  |  |  |  |  |  |  |  |  |  |  |  |  |  |  |
| Cu sulphide | 8 | 1.6 |  |  | 0.2 |  | 21.3 | 0.1 |  |  | 0.8 |  | 75.1 | 0.4 |  | 0.3 |  |  | 0.3 |  |
| Cu sulphide | 9 | 0.8 |  |  |  |  | 21.1 | 0.1 |  |  | 0.2 |  | 76.3 | 0.1 |  | 0.3 |  |  | 0.8 |  |
| **Image 13** |  |  |  |  |  |  |  |  |  |  |  |  |  |  |  |  |  |  |  |  |
| Cu sulphide | 10 | 4.1 |  |  | 0.1 |  | 17.6 | 0.1 |  |  | 1.0 |  | 76.0 | 0.2 | 0.2 | 0.3 |  |  | 0.3 |  |
| **Image 14** |  |  |  |  |  |  |  |  |  |  |  |  |  |  |  |  |  |  |  |  |
| Cu sulphide | 11 | 2.7 |  |  |  |  | 20.5 | 0.1 |  |  | 0.9 |  | 75.0 | 0.1 | 0.1 | 0.2 |  |  | 0.6 |  |
| Cu oxide | 12 | 10.9 |  |  |  |  | 0.6 | 0.3 |  |  | 0.1 |  | 87.9 |  |  | 0.3 |  |  |  |  |
| **Image 15** |  |  |  |  |  |  |  |  |  |  |  |  |  |  |  |  |  |  |  |  |
| Cu sulphide | 40 | 2.0 |  |  |  |  | 22.4 |  |  |  | 0.2 |  | 73.7 | 0.5 | 0.1 | 0.3 |  |  | 0.8 |  |
| Cu oxide | 41 | 12.0 |  |  |  |  |  | 0.3 |  |  | 0.1 |  | 86.7 | 0.1 | 0.2 | 0.1 | 0.1 |  | 0.2 |  |
| **Image 16** |  |  |  |  |  |  |  |  |  |  |  |  |  |  |  |  |  |  |  |  |
| Cu sulphide | 42 | 2.1 |  |  |  |  | 22.2 |  |  |  | 0.3 |  | 73.3 | 1.0 | 0.1 | 0.4 | 0.1 |  | 0.8 |  |
| Cu sulphide | 43 | 2.2 |  |  |  |  | 21.8 |  |  |  | 0.1 |  | 74.6 | 0.1 |  | 0.4 |  |  | 0.9 |  |
| Cu oxide | 44 | 10.9 |  |  |  |  | 0.2 | 0.3 |  |  |  |  | 88.0 | 0.2 | 0.2 |  | 0.1 |  |  |  |
| **Image 17** |  |  |  |  |  |  |  |  |  |  |  |  |  |  |  |  |  |  |  |  |
| Cu sulphide | 45 |  |  |  |  |  | 22.5 |  |  |  | 0.3 |  | 76.3 | 0.1 |  |  |  |  | 0.8 |  |
| Cu oxide | 46 | 13.1 |  |  |  |  | 0.2 | 0.6 |  |  | 0.7 |  | 82.9 | 0.1 | 1.4 |  |  | 0.1 | 0.9 |  |
| Cu sulphide (area) | 47 | 3.0 |  |  |  |  | 20.6 | 0.1 |  |  | 1.3 |  | 73.9 | 0.1 |  | 0.2 |  |  | 0.8 |  |
| **Image 18** |  |  |  |  |  |  |  |  |  |  |  |  |  |  |  |  |  |  |  |  |
| Cu sulphide (area) | 48 | 5.1 |  | 0.3 | 0.1 |  | 17.3 | 0.3 |  |  | 1.0 |  | 75.0 | 0.2 |  | 0.2 | 0.1 |  | 0.5 |  |
| **Image 19** |  |  |  |  |  |  |  |  |  |  |  |  |  |  |  |  |  |  |  |  |
| Inclusion | 49 | 8.3 |  | 0.2 | 0.2 | 0.1 | 0.3 | 3.1 |  | 0.1 | 0.1 |  | 11.3 | 0.1 | 0.2 | 0.7 |  |  | 24.4 | 51.1 |
| Cu (area) | 50 | 1.3 |  |  |  |  |  |  |  |  | 0.9 |  | 93.1 | 0.8 | 3.1 | 0.3 | 0.2 | 0.1 | 0.2 |  |
| **Image 20** |  |  |  |  |  |  |  |  |  |  |  |  |  |  |  |  |  |  |  |  |
| Cu sulphide | 51 | 1.3 |  |  |  |  | 22.7 |  |  |  | 0.2 |  | 74.7 | 0.2 |  | 0.3 |  | 0.1 | 0.6 |  |
| Cu sulphide | 52 | 3.2 |  |  |  |  | 21.1 |  |  |  | 4.8 |  | 69.8 | 0.2 |  | 0.2 |  |  | 0.7 |  |

|  |  |
| --- | --- |
| Image 10 | Image 11 |
|  |  |
| Image 12 | Image 13 |
|  |  |
| Image 14 | Image 15 |
|  |  |
|  |  |
| Image 16 | Image 17 |
|  |  |
| Image 18 | Image 19 |
|  | Fig. 17 Locations of the analyses performed on specimen TSRP46. The corresponding analytical results are reported in the table above. |
| Image 20 |

#### TSRP12

|  |
| --- |

Fig. 18 Cross-section of sample TSRP12 before undergoing the mounting and polishing processes.

Table 18 Analyses carried out on sample TSRP12

| **Description** | **Sp.** | **O** | **Mg** | **Al** | **Si** | **P** | **S** | **Cl** | **K** | **Ca** | **Fe** | **Ni** | **Cu** | **Zn** | **As** | **Ag** | **Sn** | **Sb** | **Pb** |
| --- | --- | --- | --- | --- | --- | --- | --- | --- | --- | --- | --- | --- | --- | --- | --- | --- | --- | --- | --- |
| **Image 1** |  |  |  |  |  |  |  |  |  |  |  |  |  |  |  |  |  |  |  |
| Cu (area) | 1 | 1.5 |  |  |  |  |  |  |  |  | 0.9 |  | 96.7 | 0.4 |  | 0.1 | 0.1 | 0.3 | 0.1 |
| Cu sulphide | 4 | 1.3 |  |  |  |  | 20.9 |  |  |  | 0.1 |  | 77.2 | 0.1 |  | 0.2 |  |  | 0.3 |
| Inclusion | 5 | 10.1 |  |  | 0.2 |  |  |  |  |  | 0.1 |  | 6.1 | 0.1 |  | 2.4 |  | 0.2 | 81.0 |
| **Image 2** |  |  |  |  |  |  |  |  |  |  |  |  |  |  |  |  |  |  |  |
| Cu (area) | 6 | 1.2 |  |  |  |  |  |  |  |  | 0.8 | 0.1 | 97.2 | 0.4 |  | 0.1 |  | 0.1 | 0.1 |
| Inclusion | 7 | 16.3 |  |  |  | 0.1 | 9.8 |  |  |  | 0.1 |  | 4.8 | 0.1 |  |  |  |  | 69.1 |
| Cu sulphide | 8 | 1.4 |  |  |  |  | 20.5 |  |  |  | 0.1 |  | 77.6 | 0.1 |  |  |  |  | 0.2 |
| Cu oxide | 9 | 9.7 |  |  |  |  |  | 0.2 |  |  | 0.1 |  | 89.9 |  |  |  | 0.2 |  |  |
| Image 3 |  |  |  |  |  |  |  |  |  |  |  |  |  |  |  |  |  |  |  |
| Cu oxide (area) | 10 | 9.6 |  |  |  |  |  | 0.2 |  |  | 0.2 |  | 89.5 | 0.1 |  |  | 0.1 |  | 0.2 |
| Inclusion | 11 | 16.8 |  |  |  |  | 9.8 |  | 0.1 |  |  |  | 3.2 |  |  |  |  |  | 69.9 |
| Cu (area) | 12 | 1.4 |  |  |  |  |  | 0.1 |  |  | 0.6 |  | 96.5 | 0.4 |  |  | 0.3 | 0.6 | 0.1 |
| Cu | 13 |  |  |  |  |  |  | 0.2 |  |  | 0.1 |  | 90.4 | 0.1 |  |  |  |  | 0.1 |
| Image 4 |  |  |  |  |  |  |  |  |  |  |  |  |  |  |  |  |  |  |  |
| Cu oxide (area) | 18 | 9.6 |  |  |  |  | 0.2 |  |  |  | 0.1 | 0.1 | 88.9 | 0.1 |  |  | 0.1 | 0.1 |  |
| Cu (area) | 19 | 1.4 |  |  |  |  |  |  |  |  | 0.9 |  | 96.8 | 0.3 | 0.1 | 0.1 |  | 0.1 | 0.3 |
| Image 5 |  |  |  |  |  |  |  |  |  |  |  |  |  |  |  |  |  |  |  |
| Inclusion | 21 | 16.5 |  |  |  |  | 9.8 |  |  |  | 0.1 |  | 3.4 |  | 0.1 | 0.2 |  |  | 69.9 |
| Inclusion | 22 | 16.4 |  |  |  |  | 2.4 | 4.2 |  |  | 0.1 | 0.1 | 7.6 |  | 0.2 | 1.3 |  | 3.0 | 64.8 |
| Inclusion | 23 | 16.5 |  |  |  |  | 9.6 |  |  |  | 0.1 |  | 6.0 | 0.1 |  |  |  |  | 67.6 |
| Image 6 |  |  |  |  |  |  |  |  |  |  |  |  |  |  |  |  |  |  |  |
| Cu sulphide | 24 | 4.7 |  |  | 0.1 |  | 13.6 |  |  |  | 0.1 |  | 81.1 | 0.1 |  |  |  |  | 0.3 |
| Cu sulphide | 25 | 2.7 |  |  |  |  | 19.6 |  |  |  | 0.6 |  | 75.6 | 0.5 |  | 0.1 |  | 0.1 | 0.8 |
| Cu sulphide | 26 | 2.6 |  |  |  |  | 19.6 |  |  |  | 0.4 |  | 76.3 | 0.1 |  |  |  |  | 1.0 |
| Cu sulphide | 27 | 2.4 |  |  |  |  | 20.1 |  |  |  | 0.1 |  | 76.6 | 0.2 |  |  |  | 0.1 | 0.5 |
| Image 7 |  |  |  |  |  |  |  |  |  |  |  |  |  |  |  |  |  |  |  |
| Inclusion | 28 | 7.1 |  |  |  |  |  | 9.4 |  |  | 0.2 |  | 20.5 | 0.1 | 0.5 | 0.1 | 0.2 | 11.6 | 50.4 |
| Inclusion | 29 | 16.2 |  |  |  |  | 9.3 |  |  |  | 0.5 |  | 5.7 |  |  |  |  |  | 68.3 |
| Cu sulphide | 30 | 2.5 |  |  |  |  | 19.5 | 0.2 |  |  | 0.2 |  | 76.8 | 0.2 |  |  |  |  | 0.6 |

|  |  |
| --- | --- |
| Image 1 | Image 2 |
|  |  |
| Image 3 | Image 4 |
|  |  |
| Image 5 | Image 6 |
|  |  |
| Image 7 | Image 8 |
|  |  |
| Image 9 | Image 10 |

Fig. 19 Locations of the analyses performed on specimen TSRP12. The corresponding analytical results are reported in the table above.

#### TSRP20

|  |
| --- |

Fig. 20 Cross-section of sample TSRP20 (length = 2.7 cm)

Table 19 Analyses carried out on sample TSRP20

| **Description** | **Sp.** | **O** | **Mg** | **Al** | **Si** | **P** | **S** | **Cl** | **K** | **Ca** | **Fe** | **Ni** | **Cu** | **Zn** | **As** | **Ag** | **Sn** | **Sb** | **Pb** |
| --- | --- | --- | --- | --- | --- | --- | --- | --- | --- | --- | --- | --- | --- | --- | --- | --- | --- | --- | --- |
| **Image 3** |  |  |  |  |  |  |  |  |  |  |  |  |  |  |  |  |  |  |  |
| Cu sulphide | 31 | 3.2 |  |  |  |  | 18.6 |  |  |  | 0.1 |  | 77.3 |  |  |  | 0.1 |  | 0.7 |
| Cu (area) | 32 |  |  |  |  |  |  |  |  |  |  | 0.3 | 97.9 |  | 0.7 | 0.1 | 0.9 |  | 0.2 |
| High-Sn spot | 33 |  |  |  |  |  |  | 0.1 | 0.1 |  | 0.1 | 0.1 | 69.9 | 0.1 | 1.4 | 0.9 | 22.9 | 2.6 | 0.9 |
| Inclusion | 34 | 8.9 |  | 0.2 |  |  |  | 0.4 |  |  |  | 0.1 | 41.1 |  | 0.2 | 0.1 | 4.3 | 0.2 | 44.5 |
| Cu | 35 |  |  |  |  |  |  |  |  |  |  |  | 98.3 | 0.1 | 0.3 |  | 1.1 |  | 0.1 |
| **Image 4** |  |  |  |  |  |  |  |  |  |  |  |  |  |  |  |  |  |  |  |
| Cu-Sn (area) | 36 | 2.8 |  |  |  |  |  |  |  |  |  |  | 89.9 | 0.1 | 0.9 | 0.2 | 4.0 | 0.1 | 2.0 |
| **Image 5** |  |  |  |  |  |  |  |  |  |  |  |  |  |  |  |  |  |  |  |
| Sn oxide | 37 | 18.5 |  |  |  |  |  |  | 0.5 |  | 0.1 | 0.1 | 2.8 |  |  |  | 76.9 | 1.0 |  |
| Sn oxide | 38 | 20 |  |  |  |  |  |  | 0.3 |  | 0.1 |  | 4.9 |  |  |  | 71.0 | 1.0 | 2.7 |
| Cu-Sn | 39 | 3.3 |  |  |  |  |  |  |  |  |  | 0.1 | 66.9 | 0.1 | 2.8 | 0.9 | 20.1 | 2.3 | 3.6 |
| Cu (area) | 40 | 1.8 |  |  |  |  |  |  |  |  |  | 0.1 | 96.9 | 0.2 | 0.1 | 0.1 | 0.8 |  |  |
| **Image 6** |  |  |  |  |  |  |  |  |  |  |  |  |  |  |  |  |  |  |  |
| Cu oxide | 41 | 8.9 |  |  |  |  |  |  |  |  |  |  | 90.9 |  |  |  |  |  |  |
| Inclusion | 42 | 15.8 |  |  |  |  | 10.3 |  |  |  |  |  | 2.0 |  |  |  |  |  | 71.9 |
| Cu | 43 | 1.3 |  |  |  |  |  |  |  |  |  |  | 96.9 | 0.1 | 0.3 | 0.1 | 1.0 | 0.1 |  |
| Sn oxide | 44 | 20.2 |  |  |  |  |  |  | 0.2 |  | 0.1 |  | 4.1 |  |  |  | 74.4 | 0.8 | 0.1 |
| **Image 7** |  |  |  |  |  |  |  |  |  |  |  |  |  |  |  |  |  |  |  |
| Cu oxide | 47 | 33.3 |  |  |  | 0.3 |  |  |  | 0.7 | 0.1 |  | 64.6 | 0.2 |  |  |  | 0.1 | 0.7 |
| Cu-Sn oxidised | 48 | 19.5 |  |  |  |  |  |  | 0.4 |  | 13.7 | 2.7 | 38.1 | 1.2 |  |  | 21.2 | 0.2 | 3.1 |
| Ferrite | 49 | 28.1 |  |  |  |  |  |  | 1.0 |  | 38.9 | 7.7 | 2.9 | 3.0 | 0.1 |  | 17.8 |  | 0.3 |
| **Image 8** |  |  |  |  |  |  |  |  |  |  |  |  |  |  |  |  |  |  |  |
| Cu | 53 | 1.2 |  |  |  |  |  |  |  |  | 0.1 | 0.1 | 98.3 |  | 0.2 | 0.1 | 0.1 |  |  |
| Cu oxide | 54 | 10.2 |  |  |  |  |  |  |  |  |  |  | 89.2 | 0.2 | 0.1 |  |  |  |  |

|  |  |
| --- | --- |
| Image 1 | Image 2 |
|  |  |
| Image 3 | Image 4 |
|  |  |
| Image 5 | Image 6 |
|  |  |
| Image 7 | Image 8 |

Fig. 21 Locations of the analyses performed on specimen TSRP20. The corresponding analytical results are reported in the table above.

#### TSRP104

|  |
| --- |

Fig. 22 Cross-section of sample TSRP104 before undergoing the mounSng and polishing processes.

Table 20. Compositional analysis of the low-oxidized regions in sample TSRP104, with the Cu-Sn alloy values normalized to 100%.

| **Sp.** | **O** | **Fe** | **Ni** | **Cu** | **Zn** | **As** | **Ag** | **Sn** | **Sb** | **Pb** |  | **Cu** | **Sn** |
| --- | --- | --- | --- | --- | --- | --- | --- | --- | --- | --- | --- | --- | --- |
| **Image 1** |  |  |  |  |  |  |  |  |  |  |  |  |  |
| 102 | 0.6 |  | 0.1 | 93.5 |  | 0.1 | 0.1 | 5.3 | 0.3 | 0.1 |  | 94.9 | 5.1 |
| 103 | 0.9 |  | 0.1 | 91.5 |  |  | 0.2 | 6.9 | 0.2 | 0.2 |  | 93.2 | 6.8 |
| **Image 2** |  |  |  |  |  |  |  |  |  |  |  |  |  |
| 106 | 1.0 | 0.1 | 0.2 | 90.7 | 0.1 |  | 0.1 | 7.4 | 0.2 | 0.3 |  | 92.4 | 7.6 |
| **Image 3** |  |  |  |  |  |  |  |  |  |  |  |  |  |
| 108 | 0.9 | 0.1 | 0.1 | 91.0 | 0.1 | 0.5 |  | 7.0 | 0.3 |  |  | 92.8 | 7.2 |
| 109 | 1.0 | 0.1 | 0.1 | 90.6 | 0.1 | 0.2 | 0.1 | 7.5 | 0.4 | 0.1 |  | 92.5 | 7.5 |
| **Image 4** |  |  |  |  |  |  |  |  |  |  |  |  |  |
| 112 | 0.8 |  | 0.1 | 91.3 |  | 0.2 | 0.1 | 7.0 | 0.4 | 0.1 |  | 92.8 | 7.2 |
| 113 | 0.9 | 0.1 | 0.1 | 93.3 |  | 0.2 |  | 5.1 | 0.2 | 0.1 |  | 94.8 | 5.2 |
| 114 | 1.1 | 0.1 | 0.2 | 90.9 |  | 0.1 | 0.1 | 6.9 | 0.7 |  |  | 92.9 | 7.1 |
| 115 | 1.0 | 0.1 |  | 90.9 | 0.2 | 0.1 | 0.1 | 6.8 | 0.2 | 0.4 |  | 93.1 | 6.9 |
| **Image 5** |  |  |  |  |  |  |  |  |  |  |  |  |  |
| 116 | 1.0 |  | 0.1 | 92.7 | 0.1 | 0.2 |  | 5.5 | 0.2 | 0.1 |  | 94.4 | 5.6 |
| 117 | 1.0 |  |  | 93.7 | 0.1 | 0.1 | 0.4 | 4.5 | 0.3 |  |  | 95.4 | 4.6 |
| **Image 6** |  |  |  |  |  |  |  |  |  |  |  |  |  |
| 118 | 1.1 |  |  | 92.8 | 0.1 | 0.2 | 0.1 | 5.5 | 0.2 |  |  | 94.6 | 5.4 |
| **Image 7** |  |  |  |  |  |  |  |  |  |  |  |  |  |
| 119 | 1.4 |  |  | 91.9 | 0.1 | 0.1 | 0.1 | 6.3 | 0.2 |  |  | 93.8 | 6.2 |
| 120 | 0.9 |  | 0.1 | 94.7 | 0.1 | 0.1 | 0.1 | 3.8 | 0.1 |  |  | 96.1 | 3.9 |
| **Image 8** |  |  |  |  |  |  |  |  |  |  |  |  |  |
| 121 | 1.2 |  |  | 94.6 |  | 0.1 | 0.1 | 4.0 | 0.1 |  |  | 96.0 | 4.0 |
| 122 | 1.2 |  | 0.1 | 95.2 | 0.1 | 0.1 | 0.1 | 3.1 | 0.1 |  |  | 96.8 | 3.2 |
| 123 | 1.0 |  |  | 93.5 | 0.1 | 0.1 |  | 5.2 |  | 0.1 |  | 94.8 | 5.2 |
| 124 | 1.6 |  | 0.2 | 92.9 |  |  |  | 4.8 | 0.4 |  |  | 95.1 | 4.9 |
| **Image 9** |  |  |  |  |  |  |  |  |  |  |  |  |  |
| 125 | 0.7 |  | 0.1 | 94.3 | 0.2 | 0.2 | 0.1 | 4.2 | 0.2 |  |  | 95.7 | 4.3 |
| 126 | 0.7 |  | 0.1 | 93.7 | 0.1 | 0.1 |  | 5.0 | 0.2 |  |  | 95.0 | 5.0 |
| **Image 10** |  |  |  |  |  |  |  |  |  |  |  |  |  |
| 127 | 0.8 |  | 0.1 | 92.2 | 0.2 |  | 0.1 | 6.5 | 0.1 | 0.1 |  | 93.4 | 6.6 |
| 128 | 0.9 |  | 0.1 | 91.6 | 0.1 | 0.1 | 0.1 | 6.7 | 0.4 |  |  | 93.2 | 6.8 |
| **Image 11** |  |  |  |  |  |  |  |  |  |  |  |  |  |
| 129 | 1.0 |  |  | 92.3 |  | 0.1 | 0.1 | 6.1 | 0.4 | 0.1 |  | 93.8 | 6.2 |
| 130 | 0.9 |  | 0.1 | 92.8 | 0.1 | 0.1 | 0.1 | 5.6 | 0.3 |  |  | 94.3 | 5.7 |
| 131 | 1.0 |  |  | 93.8 |  | 0.1 | 0.1 | 4.6 | 0.2 | 0.1 |  | 95.3 | 4.7 |
| 132 | 1.3 |  | 0.1 | 93.9 | 0.1 | 0.1 | 0.1 | 3.9 | 0.4 | 0.1 |  | 96.0 | 4.0 |
|  |  |  |  |  |  |  |  |  |  |  |  |  |  |
| Max | 1.6 | 0.1 | 0.2 | 94.9 | 0.2 | 0.3 | 0.2 | 7.4 | 0.4 | 0.4 |  |  |  |
| Min | 0.6 |  |  | 90.3 |  |  |  | 3.1 |  |  |  |  |  |
| **Average** | **1.0** | **0.1** | **0.1** | **92.5** | **0.1** | **0.1** | **0.1** | **5.5** | **0.2** | **0.1** |  | **94.3** | **5.7** |
| σ | 0.2 |  |  | 1.3 |  | 0.1 |  | 1.2 | 0.1 | 0.1 |  |  |  |

Table 21 Analyses carried out on the corroded/oxidised areas and the inclusion.

| **Area** | **Sp** | **O** | **Mg** | **Al** | **Si** | **P** | **S** | **Cl** | **K** | **Ca** | **Fe** | **Ni** | **Cu** | **Zn** | **As** | **Ag** | **Sn** | **Sb** | **Pb** |
| --- | --- | --- | --- | --- | --- | --- | --- | --- | --- | --- | --- | --- | --- | --- | --- | --- | --- | --- | --- |
| **Image 1** |  |  |  |  |  |  |  |  |  |  |  |  |  |  |  |  |  |  |  |
| Corroded/oxidised | 104 | 25.0 | 0.1 |  | 3.8 | 2.5 | 0.1 | 0.1 | 0.1 | 2.3 | 0.5 | 0.1 | 4 | 0.2 | 0.3 |  | 21.1 | 0.6 | 3.2 |
| Corroded/oxidised | 105 | 18.0 |  |  | 0.1 | 0.2 | 4.1 | 0.3 |  |  |  |  | 74.7 | 0.1 | 0.2 | 0.7 | 1.2 |  | 0.4 |
| **Image 2** |  |  |  |  |  |  |  |  |  |  |  |  |  |  |  |  |  |  |  |
| Corroded/oxidised | 107 | 16.4 |  | 0.1 | 0.5 | 0.3 | 0.1 | 1.4 | 0.1 |  | 0.1 | 0.1 | 66.3 | 0.2 | 0.1 | 0.1 | 13.4 | 0.6 | 0.5 |
| **Image 3** |  |  |  |  |  |  |  |  |  |  |  |  |  |  |  |  |  |  |  |
| Corroded/oxidised | 111 | 10 |  | 0.1 |  | 0.1 |  | 0.1 |  |  | 0.1 | 0.1 | 88.1 | 0.1 |  |  | 1.2 | 0.1 | 0.1 |
| Inclusion | 110 | 16.5 |  |  |  |  | 8.2 |  | 0.1 |  | 0.1 |  | 15.5 |  |  |  | 3.4 |  | 56.2 |

|  |  |
| --- | --- |
| Image 1 | Image 2 |
|  |  |
| Image 3 | Image 4 |
|  |  |
| Image 5 | Image 6 |
|  |  |
| Image 7 | Image 8 |
|  |  |
| Image 9 | Image 10 |
|  | Fig. 23 Locations of the analyses performed on specimen TSRP104. The corresponding analytical results are reported in the table above. |
| Image 11 |
